# Supplementary material for: Tissue-Specific Expression and Regulatory Networks of Pig MicroRNAome
Source: PLoS One. 2014 Apr 3;9(4):e89755. doi: 10.1371/journal.pone.0089755 (PMC3974652; doi:10.1371/journal.pone.0089755)
Supplement: Table S2 — Results of triplet-SVM analysis and Microprocessor SVM algorithm. (XLS) [file pone.0089755.s002.xls]

## Sheet: Table A triplet_svm-candidates
Table S2. Results of triplet-SVM analysis.
Chromosome	Hairpin start position	Hairpin end position	Genomic strand position	Hairpin dimension (bp)
1	100385830	100385898	+	68
1	100958282	100958392	+	110
1	100958287	100958386	+	99
1	100958300	100958372	+	72
1	101137632	101137686	+	54
1	101483725	101483850	+	125
1	102795815	102795869	-	54
1	102865395	102865501	+	106
1	102865395	102865502	-	107
1	102898250	102898304	+	54
1	103804062	103804145	+	83
1	103849881	103849999	+	118
1	104637811	104637900	+	89
1	104886595	104886811	+	216
1	104886599	104886807	+	208
1	104886617	104886789	+	172
1	106219040	106219108	-	68
1	108918068	108918147	+	79
1	109231761	109231891	+	130
1	109231772	109231884	+	112
1	109231772	109231884	-	112
1	109458786	109459002	-	216
1	109458833	109458955	-	122
1	109458837	109458951	-	114
1	109598663	109598879	-	216
1	109598688	109598854	-	166
1	109598712	109598826	-	114
1	109857679	109857830	+	151
1	110391731	110391843	-	112
1	110491268	110491380	+	112
1	110611045	110611261	-	216
1	110611050	110611254	-	204
1	110611053	110611252	-	199
1	110611057	110611249	-	192
1	110611064	110611241	-	177
1	110611071	110611234	-	163
1	110617868	110618085	-	217
1	110682737	110682953	-	216
1	110682742	110682946	-	204
1	110682745	110682944	-	199
1	110682749	110682941	-	192
1	110682756	110682933	-	177
1	110682763	110682926	-	163
1	110689641	110689858	-	217
1	110768563	110768730	+	167
1	110771428	110771594	-	166
1	110771443	110771579	+	136
1	110771445	110771579	+	134
1	110771448	110771576	+	128
1	110771452	110771571	+	119
1	110771457	110771567	+	110
1	111010151	111010367	+	216
1	111357538	111357626	+	88
1	113307653	113307789	+	136
1	113307660	113307782	+	122
1	113307664	113307778	+	114
1	113307681	113307762	+	81
1	113677853	113677925	-	72
1	11370482	11370564	+	82
1	113935047	113935172	-	125
1	113935057	113935161	-	104
1	113935061	113935158	-	97
1	11395409	11395557	-	148
1	115689217	115689313	-	96
1	115697030	115697111	+	81
1	115876377	115876473	-	96
1	115884192	115884273	+	81
1	116874610	116874798	+	188
1	117034440	117034653	-	213
1	117034441	117034650	-	209
1	117034445	117034648	-	203
1	117034462	117034630	+	168
1	117034475	117034618	+	143
1	117034484	117034609	+	125
1	11737433	11737648	+	215
1	11737434	11737648	-	214
1	11737440	11737642	-	202
1	11737464	11737619	-	155
1	11737470	11737613	-	143
1	117656944	117657024	-	80
1	117656945	117657024	+	79
1	117888643	117888738	+	95
1	117888649	117888732	+	83
1	11931780	11931876	+	96
1	119447558	119447660	-	102
1	12108684	12108901	-	217
1	121263664	121263856	+	192
1	121263669	121263850	+	181
1	121263695	121263823	+	128
1	122125596	122125740	+	144
1	122125607	122125730	+	123
1	122125619	122125717	-	98
1	122125623	122125713	-	90
1	122710141	122710287	+	146
1	122936347	122936413	+	66
1	123720986	123721203	-	217
1	123720999	123721190	-	191
1	123721024	123721165	-	141
1	123858957	123859061	-	104
1	123974368	123974584	+	216
1	124406977	124407086	+	109
1	124479436	124479512	-	76
1	125738083	125738298	+	215
1	126156797	126156889	+	92
1	126157597	126157725	+	128
1	127917125	127917341	-	216
1	127917126	127917338	-	212
1	127917148	127917323	-	175
1	127917166	127917304	-	138
1	128779909	128780005	-	96
1	129694264	129694323	-	59
1	129699536	129699640	+	104
1	130447860	130447965	+	105
1	130448454	130448546	+	92
1	130568063	130568185	+	122
1	130568672	130568764	+	92
1	132473430	132473571	+	141
1	133530785	133530871	-	86
1	133530788	133530868	-	80
1	133813630	133813767	+	137
1	133879882	133880096	-	214
1	133879900	133880078	-	178
1	134398452	134398576	+	124
1	134543675	134543890	-	215
1	134970708	134970892	+	184
1	135015951	135016043	+	92
1	135112620	135112723	-	103
1	135112625	135112718	-	93
1	135112631	135112711	-	80
1	135242785	135242909	+	124
1	136121555	136121771	-	216
1	136121561	136121768	-	207
1	136121568	136121760	-	192
1	136121576	136121751	-	175
1	136121594	136121735	-	141
1	136410455	136410546	-	91
1	136425177	136425318	-	141
1	136706213	136706297	+	84
1	136792658	136792737	-	79
1	136805352	136805569	+	217
1	136805352	136805569	-	217
1	136805356	136805565	+	209
1	136805356	136805565	-	209
1	136805365	136805557	+	192
1	136805371	136805551	+	180
1	136805376	136805546	+	170
1	136805388	136805534	+	146
1	136849377	136849456	-	79
1	137060970	137061038	+	68
1	137210593	137210810	-	217
1	137210597	137210806	-	209
1	137210602	137210801	-	199
1	137309700	137309915	+	215
1	137309706	137309907	+	201
1	137309708	137309907	+	199
1	137309720	137309893	+	173
1	137309731	137309882	+	151
1	137309733	137309881	-	148
1	137309735	137309878	+	143
1	137309742	137309871	-	129
1	137309751	137309863	+	112
1	137311458	137311522	+	64
1	13943843	13943963	-	120
1	140092122	140092202	+	80
1	142482516	142482573	+	57
1	142560946	142561075	+	129
1	142683242	142683458	+	216
1	142683260	142683440	+	180
1	142878045	142878261	-	216
1	142878063	142878243	-	180
1	14370017	14370141	+	124
1	143777521	143777684	-	163
1	144986470	144986687	-	217
1	144986471	144986685	+	214
1	144986481	144986676	+	195
1	144986486	144986672	-	186
1	144986488	144986669	+	181
1	144986488	144986669	-	181
1	144986510	144986646	+	136
1	144986516	144986641	+	125
1	144986528	144986629	+	101
1	145011200	145011263	-	63
1	14515229	14515360	+	131
1	14515241	14515349	+	108
1	14515248	14515341	+	93
1	145482533	145482664	+	131
1	145482537	145482660	+	123
1	145698542	145698673	-	131
1	145698546	145698669	-	123
1	146333604	146333780	-	176
1	14672409	14672519	-	110
1	14672418	14672511	-	93
1	147052515	147052648	+	133
1	147065605	147065674	+	69
1	147239779	147239879	+	100
1	148691180	148691301	+	121
1	149667547	149667657	+	110
1	149667555	149667651	-	96
1	149667557	149667648	-	91
1	149834690	149834905	-	215
1	149834695	149834900	-	205
1	150367368	150367517	-	149
1	150367381	150367502	-	121
1	150367384	150367500	-	116
1	151020267	151020424	-	157
1	151427727	151427793	+	66
1	15153782	15153931	+	149
1	15153824	15153912	+	88
1	15254269	15254418	+	149
1	15254311	15254399	+	88
1	15323954	15324039	-	85
1	153921434	153921521	-	87
1	15499242	15499327	+	85
1	155557764	155557844	-	80
1	155686633	155686759	+	126
1	155686663	155686728	-	65
1	156034114	156034184	-	70
1	156358448	156358655	+	207
1	156358456	156358647	+	191
1	156358465	156358637	+	172
1	156358465	156358637	-	172
1	156358469	156358632	-	163
1	156358470	156358633	+	163
1	156358489	156358613	+	124
1	156388201	156388296	-	95
1	156388213	156388288	-	75
1	157077858	157077956	-	98
1	157077863	157077950	-	87
1	157077866	157077946	-	80
1	157590993	157591122	-	129
1	15850323	15850534	+	211
1	15869732	15869808	-	76
1	158728532	158728628	+	96
1	159432087	159432232	-	145
1	159432102	159432222	+	120
1	159432102	159432223	-	121
1	159432104	159432222	+	118
1	159432106	159432219	+	113
1	159432106	159432219	-	113
1	159432113	159432212	+	99
1	159432119	159432205	-	86
1	159432132	159432193	+	61
1	159663053	159663270	-	217
1	159663059	159663263	-	204
1	159663068	159663255	-	187
1	159663076	159663246	-	170
1	159663097	159663226	-	129
1	159663102	159663222	-	120
1	159663107	159663215	-	108
1	159786705	159786922	-	217
1	159786726	159786900	-	174
1	16017613	16017813	+	200
1	16017613	16017814	-	201
1	16017649	16017778	+	129
1	16017649	16017778	-	129
1	16017654	16017773	+	119
1	16017661	16017767	+	106
1	160426953	160427077	-	124
1	160716170	160716243	-	73
1	160868812	160868929	-	117
1	160868816	160868924	-	108
1	161112301	161112382	-	81
1	161454206	161454301	-	95
1	16151381	16151470	-	89
1	16151393	16151455	+	62
1	161520960	161521055	-	95
1	162076051	162076169	+	118
1	162553583	162553782	-	199
1	162553589	162553776	-	187
1	162553597	162553768	-	171
1	162553605	162553759	-	154
1	163786189	163786402	+	213
1	163786192	163786399	+	207
1	163786192	163786400	-	208
1	163786202	163786390	-	188
1	163939645	163939858	+	213
1	163939648	163939855	+	207
1	163939648	163939856	-	208
1	163939658	163939846	-	188
1	164354413	164354563	-	150
1	164599832	164599929	+	97
1	165028448	165028516	-	68
1	165187035	165187093	+	58
1	166724804	166724920	-	116
1	168328856	168329073	+	217
1	168328856	168329073	-	217
1	168328889	168329039	+	150
1	168328893	168329036	+	143
1	168613306	168613522	+	216
1	168613312	168613516	+	204
1	168613324	168613503	+	179
1	168613336	168613492	+	156
1	168613345	168613483	+	138
1	168852448	168852664	-	216
1	168852454	168852658	-	204
1	168852467	168852646	-	179
1	168852478	168852634	-	156
1	168852487	168852625	-	138
1	168919925	168920044	+	119
1	169450379	169450459	-	80
1	170436691	170436758	-	67
1	171822352	171822558	+	206
1	171857464	171857618	-	154
1	171964931	171965038	+	107
1	172159178	172159260	-	82
1	172162322	172162476	+	154
1	172162340	172162459	+	119
1	172162363	172162437	+	74
1	172162368	172162431	+	63
1	172402125	172402208	-	83
1	172402734	172402869	-	135
1	172464988	172465182	-	194
1	173196691	173196770	-	79
1	174725559	174725633	+	74
1	174861102	174861194	+	92
1	175714358	175714478	+	120
1	17591009	17591081	+	72
1	176314974	176315031	+	57
1	17667624	17667837	-	213
1	17667624	17667839	-	215
1	17667625	17667838	+	213
1	17667628	17667833	-	205
1	17667634	17667828	-	194
1	177084647	177084862	-	215
1	177084659	177084850	-	191
1	177084679	177084828	-	149
1	177614146	177614307	+	161
1	177614157	177614296	+	139
1	177614160	177614292	+	132
1	177614166	177614286	+	120
1	177614170	177614283	+	113
1	177614174	177614278	+	104
1	177614182	177614271	+	89
1	177614682	177614807	+	125
1	177641767	177641982	-	215
1	177641786	177641962	-	176
1	17818704	17818906	-	202
1	17818709	17818901	-	192
1	17818712	17818897	-	185
1	178195118	178195218	+	100
1	18230189	18230280	-	91
1	182344362	182344537	+	175
1	182344369	182344530	+	161
1	182344373	182344527	+	154
1	182344379	182344519	+	140
1	182344385	182344514	+	129
1	182344539	182344619	+	80
1	183180527	183180742	-	215
1	183180533	183180738	-	205
1	183180547	183180723	-	176
1	183180551	183180719	+	168
1	183180598	183180671	+	73
1	183184926	183185024	+	98
1	183442199	183442320	+	121
1	184272391	184272477	+	86
1	185506694	185506774	+	80
1	187468480	187468564	-	84
1	187468482	187468560	-	78
1	187580716	187580789	+	73
1	187583626	187583713	+	87
1	187697269	187697373	+	104
1	187697280	187697361	+	81
1	187698872	187699087	+	215
1	187835566	187835683	-	117
1	187835568	187835678	-	110
1	187835571	187835675	-	104
1	187974425	187974631	-	206
1	187974451	187974604	+	153
1	187974470	187974586	+	116
1	187974485	187974570	+	85
1	188619192	188619329	+	137
1	188846757	188846944	+	187
1	188846771	188846931	+	160
1	188846783	188846918	+	135
1	188846792	188846910	+	118
1	188846935	188847063	+	128
1	190120952	190121030	+	78
1	190298621	190298837	-	216
1	190476764	190476940	+	176
1	190895260	190895477	-	217
1	190895279	190895458	-	179
1	190895291	190895446	-	155
1	190971082	190971298	-	216
1	190971094	190971286	-	192
1	190971107	190971271	-	164
1	190971107	190971272	+	165
1	190971118	190971262	+	144
1	190971139	190971241	+	102
1	190971943	190972081	+	138
1	190971949	190972076	+	127
1	191004498	191004682	+	184
1	191004505	191004676	+	171
1	191007168	191007245	+	77
1	19106834	19106897	-	63
1	191584408	191584619	+	211
1	191584412	191584615	+	203
1	191662318	191662439	+	121
1	191662325	191662434	+	109
1	191687132	191687242	+	110
1	191689908	191689973	+	65
1	191689911	191689970	+	59
1	19201044	19201115	+	71
1	192470772	192470879	+	107
1	192755915	192756049	-	134
1	192755920	192756041	-	121
1	192755927	192756033	-	106
1	192874841	192874938	+	97
1	192968770	192968907	+	137
1	193196346	193196520	+	174
1	193346528	193346626	-	98
1	193592629	193592724	+	95
1	194162874	194162975	+	101
1	194554877	194554974	-	97
1	195577016	195577083	+	67
1	19642280	19642488	-	208
1	196555684	196555900	+	216
1	196555701	196555881	+	180
1	196555706	196555874	+	168
1	196555708	196555872	+	164
1	196555715	196555863	+	148
1	196555723	196555857	+	134
1	196555727	196555849	+	122
1	196555730	196555846	+	116
1	197619649	197619712	-	63
1	198073480	198073545	+	65
1	199109636	199109761	-	125
1	199166274	199166490	+	216
1	199166281	199166484	+	203
1	199166296	199166470	+	174
1	199166299	199166467	+	168
1	199166321	199166445	+	124
1	199166331	199166437	+	106
1	199336829	199336893	+	64
1	200127813	200127883	+	70
1	200222761	200222821	+	60
1	200222761	200222821	-	60
1	200457280	200457374	-	94
1	20142361	20142462	+	101
1	202536081	202536200	+	119
1	203136106	203136218	+	112
1	203178490	203178695	-	205
1	203178495	203178690	-	195
1	203178498	203178687	-	189
1	203178526	203178660	-	134
1	203287670	203287885	+	215
1	203318928	203319028	+	100
1	203342962	203343062	+	100
1	204806981	204807173	+	192
1	204806988	204807167	+	179
1	204806997	204807151	+	154
1	204807001	204807148	+	147
1	204807009	204807141	+	132
1	205835141	205835216	-	75
1	207831934	207832035	-	101
1	207831941	207832030	-	89
1	208802587	208802702	-	115
1	209214583	209214678	+	95
1	209214592	209214672	+	80
1	209939214	209939286	+	72
1	209939222	209939279	+	57
1	209980382	209980447	+	65
1	210764031	210764114	-	83
1	210764039	210764107	-	68
1	211273268	211273471	+	203
1	211273272	211273467	+	195
1	211273275	211273463	+	188
1	211273281	211273458	+	177
1	212527077	212527217	-	140
1	213857671	213857801	+	130
1	213857677	213857794	+	117
1	213864445	213864530	+	85
1	214433205	214433408	-	203
1	214433209	214433403	-	194
1	214433219	214433394	+	175
1	214433223	214433390	-	167
1	214433228	214433383	+	155
1	214433236	214433377	+	141
1	214984035	214984236	-	201
1	214984052	214984220	-	168
1	214984061	214984210	-	149
1	214984079	214984192	-	113
1	216080411	216080485	+	74
1	216080413	216080485	+	72
1	216730384	216730450	+	66
1	216802226	216802282	+	56
1	216834514	216834606	+	92
1	217140522	217140661	-	139
1	217754996	217755062	-	66
1	21809123	21809264	-	141
1	218122370	218122522	-	152
1	219541789	219541894	+	105
1	220297342	220297467	+	125
1	220530464	220530571	+	107
1	22079798	22079899	-	101
1	22079811	22079889	-	78
1	224790507	224790650	-	143
1	224828516	224828648	-	132
1	225590316	225590426	-	110
1	225594354	225594490	-	136
1	225594355	225594484	-	129
1	225594384	225594468	-	84
1	225594490	225594696	+	206
1	225594529	225594658	+	129
1	225594532	225594654	+	122
1	225594532	225594654	-	122
1	225594543	225594643	-	100
1	225594545	225594641	-	96
1	225594553	225594633	-	80
1	225594560	225594627	-	67
1	226994372	226994564	+	192
1	227076259	227076381	-	122
1	227317132	227317238	-	106
1	22760919	22760979	-	60
1	228235064	228235192	+	128
1	228272631	228272732	-	101
1	22925781	22925842	-	61
1	229931189	229931337	+	148
1	229931194	229931331	+	137
1	229931202	229931322	+	120
1	230202239	230202359	-	120
1	230339165	230339222	+	57
1	231019704	231019911	+	207
1	231597004	231597220	+	216
1	231741186	231741254	-	68
1	233080546	233080673	+	127
1	233220261	233220332	+	71
1	233220267	233220327	-	60
1	233493564	233493670	+	106
1	233493567	233493668	+	101
1	233590056	233590136	+	80
1	233726843	233726914	-	71
1	233726848	233726908	+	60
1	234433322	234433459	-	137
1	235934802	235935018	+	216
1	235934805	235935016	+	211
1	237610852	237610930	-	78
1	237610853	237610929	+	76
1	238248704	238248797	+	93
1	24032187	24032404	-	217
1	240563118	240563228	-	110
1	241748010	241748116	+	106
1	241778994	241779105	-	111
1	242274212	242274357	-	145
1	242274218	242274352	-	134
1	242274222	242274349	+	127
1	242274222	242274349	-	127
1	242274238	242274334	+	96
1	242274238	242274334	-	96
1	242350552	242350616	+	64
1	242406045	242406179	+	134
1	242406048	242406175	+	127
1	242406048	242406175	-	127
1	242406063	242406159	+	96
1	242406063	242406159	-	96
1	242876045	242876099	-	54
1	243997241	243997315	+	74
1	244521169	244521286	+	117
1	245536555	245536664	-	109
1	245536556	245536663	+	107
1	245993395	245993546	+	151
1	246148249	246148371	-	122
1	246787138	246787348	-	210
1	246861591	246861785	-	194
1	246861592	246861783	-	191
1	246867089	246867299	-	210
1	247266120	247266248	+	128
1	247695188	247695404	-	216
1	247695191	247695400	-	209
1	247695201	247695389	-	188
1	248517598	248517781	+	183
1	248562073	248562288	-	215
1	248794604	248794791	-	187
1	248794606	248794789	+	183
1	248794609	248794785	+	176
1	248794610	248794785	-	175
1	248794616	248794780	-	164
1	248794618	248794777	+	159
1	248794622	248794773	+	151
1	248794624	248794772	-	148
1	248794633	248794763	-	130
1	248794637	248794760	+	123
1	248794640	248794755	-	115
1	248794641	248794753	+	112
1	248794649	248794746	+	97
1	248794659	248794735	+	76
1	249633588	249633645	+	57
1	249664088	249664183	-	95
1	249719014	249719084	-	70
1	249719019	249719078	-	59
1	249721490	249721619	+	129
1	249721493	249721616	+	123
1	251179987	251180146	-	159
1	251179996	251180137	-	141
1	251529096	251529203	+	107
1	252744994	252745087	-	93
1	253503536	253503607	+	71
1	253915223	253915285	-	62
1	254673842	254673929	+	87
1	255461031	255461103	-	72
1	259235783	259235853	+	70
1	259650890	259650975	+	85
1	260240414	260240630	+	216
1	260240414	260240630	-	216
1	260240423	260240621	-	198
1	260240424	260240621	+	197
1	260240430	260240614	-	184
1	260240440	260240604	-	164
1	260240441	260240603	+	162
1	260240451	260240593	-	142
1	260240471	260240573	+	102
1	260756172	260756232	+	60
1	260966018	260966078	+	60
1	261044646	261044778	+	132
1	261211174	261211238	-	64
1	261270588	261270804	-	216
1	261788417	261788494	+	77
1	261788421	261788490	+	69
1	2619247	2619379	-	132
1	262026051	262026259	+	208
1	26235144	26235233	+	89
1	262721032	262721196	-	164
1	262721040	262721189	-	149
1	263430104	263430320	+	216
1	263430115	263430309	-	194
1	263430127	263430297	-	170
1	263430131	263430292	-	161
1	263430143	263430280	-	137
1	264131786	264131890	+	104
1	264426800	264426901	-	101
1	264426832	264426957	-	125
1	264427387	264427474	+	87
1	264427391	264427469	+	78
1	264427400	264427460	-	60
1	264588826	264588974	-	148
1	264588929	264589018	+	89
1	264588935	264589013	+	78
1	264588944	264589003	-	59
1	264588944	264589004	+	60
1	264916991	264917189	+	198
1	264917035	264917145	+	110
1	265703618	265703830	+	212
1	266006259	266006396	+	137
1	266006270	266006386	+	116
1	266825684	266825896	+	212
1	266825689	266825892	+	203
1	266825693	266825888	+	195
1	266825698	266825882	+	184
1	267057582	267057771	-	189
1	267057601	267057753	-	152
1	267057605	267057748	-	143
1	267057618	267057735	-	117
1	267057624	267057726	-	102
1	267057630	267057722	-	92
1	267176420	267176635	+	215
1	267176433	267176622	+	189
1	267176445	267176611	+	166
1	267176451	267176603	+	152
1	267176456	267176599	+	143
1	267176469	267176586	+	117
1	267378108	267378297	-	189
1	267378127	267378279	-	152
1	267378131	267378274	-	143
1	267378144	267378261	-	117
1	267378150	267378252	-	102
1	267378156	267378248	-	92
1	267594561	267594642	-	81
1	267595551	267595684	-	133
1	267595578	267595658	-	80
1	267848152	267848224	-	72
1	270266603	270266684	+	81
1	270488173	270488254	-	81
1	270488180	270488247	-	67
1	270536129	270536233	-	104
1	270536203	270536293	-	90
1	271218321	271218378	+	57
1	271394606	271394714	+	108
1	271695660	271695793	-	133
1	271695758	271695853	-	95
1	271699004	271699080	+	76
1	271942732	271942851	+	119
1	271942740	271942842	+	102
1	272180608	272180700	-	92
1	27225630	27225844	+	214
1	27225634	27225839	+	205
1	27225647	27225831	+	184
1	27225661	27225813	+	152
1	27225673	27225801	+	128
1	272497260	272497344	+	84
1	272506727	272506874	-	147
1	272508545	272508634	-	89
1	272509820	272510014	-	194
1	272509830	272510005	+	175
1	272509836	272510003	+	167
1	272509839	272509999	+	160
1	272509841	272509994	-	153
1	272509856	272509978	-	122
1	272509857	272509979	+	122
1	272509865	272509970	-	105
1	27260687	27260852	+	165
1	27260699	27260840	+	141
1	273425889	273426101	-	212
1	273425964	273426035	-	71
1	273426091	273426308	+	217
1	273426103	273426296	+	193
1	273426112	273426287	+	175
1	273426112	273426287	-	175
1	273426119	273426278	+	159
1	273587347	273587441	-	94
1	273794793	273794983	+	190
1	273794804	273794972	+	168
1	274143561	274143641	-	80
1	274873545	274873762	-	217
1	274873546	274873761	+	215
1	274873550	274873756	+	206
1	274873551	274873756	-	205
1	274873565	274873741	-	176
1	274873577	274873729	-	152
1	274873582	274873725	-	143
1	274873587	274873719	+	132
1	274873598	274873708	+	110
1	274873608	274873697	+	89
1	274873608	274873698	-	90
1	274873614	274873691	+	77
1	274873614	274873691	-	77
1	276010261	276010456	+	195
1	277616692	277616831	+	139
1	277616704	277616822	+	118
1	277616712	277616813	+	101
1	277616720	277616805	+	85
1	278459103	278459205	+	102
1	278459108	278459200	+	92
1	280333973	280334111	-	138
1	280333993	280334094	-	101
1	280333997	280334091	+	94
1	280333997	280334091	-	94
1	281767709	281767921	-	212
1	281786202	281786417	+	215
1	281786202	281786418	-	216
1	281786209	281786411	+	202
1	281786210	281786410	-	200
1	281786211	281786408	+	197
1	281786228	281786392	+	164
1	281786237	281786382	+	145
1	281786240	281786380	+	140
1	282328004	282328220	+	216
1	282328044	282328180	+	136
1	282328055	282328169	+	114
1	283690198	283690405	-	207
1	283690214	283690390	-	176
1	283690217	283690386	-	169
1	283690224	283690379	-	155
1	283690231	283690372	-	141
1	283871926	283872015	-	89
1	284131038	284131152	-	114
1	284475065	284475274	+	209
1	284499405	284499622	-	217
1	284499427	284499600	-	173
1	284977720	284977936	-	216
1	284977736	284977920	-	184
1	284977749	284977907	-	158
1	286140215	286140432	-	217
1	286140216	286140431	+	215
1	286140222	286140425	+	203
1	286140232	286140414	+	182
1	286140256	286140391	+	135
1	286140271	286140374	+	103
1	286140277	286140369	+	92
1	286281405	286281493	+	88
1	286281408	286281493	+	85
1	286549669	286549881	+	212
1	286549685	286549866	+	181
1	286549699	286549851	+	152
1	28665417	28665503	+	86
1	28665425	28665495	+	70
1	287606093	287606309	-	216
1	287606119	287606283	-	164
1	287695595	287695736	-	141
1	287695606	287695725	-	119
1	287695622	287695708	-	86
1	287695626	287695705	-	79
1	287837121	287837262	+	141
1	287837132	287837251	+	119
1	287837149	287837235	+	86
1	287837152	287837231	+	79
1	28815948	28816038	-	90
1	288294084	288294158	-	74
1	288350307	288350381	+	74
1	288601650	288601865	+	215
1	288601656	288601858	+	202
1	288601667	288601845	+	178
1	288601671	288601841	+	170
1	288601675	288601838	+	163
1	288601683	288601831	+	148
1	288601687	288601826	+	139
1	288601694	288601818	+	124
1	288601700	288601814	+	114
1	288601703	288601810	+	107
1	288601708	288601804	+	96
1	288601708	288601805	-	97
1	290036411	290036589	-	178
1	290069309	290069404	+	95
1	290903854	290904070	+	216
1	290903862	290904062	+	200
1	290903879	290904044	+	165
1	290903883	290904041	+	158
1	290962808	290962919	-	111
1	29129756	29129970	+	214
1	29129766	29129961	+	195
1	291854492	291854705	+	213
1	291854514	291854679	+	165
1	291854523	291854670	+	147
1	291854539	291854654	+	115
1	294095238	294095330	+	92
1	294420401	294420558	+	157
1	295117432	295117513	+	81
1	295149786	295149935	-	149
1	295149803	295149917	-	114
1	295160984	295161133	-	149
1	295160990	295161128	-	138
1	295160992	295161125	-	133
1	295197560	295197711	+	151
1	295197569	295197702	+	133
1	295197579	295197692	+	113
1	295197585	295197687	+	102
1	295197595	295197676	+	81
1	295234327	295234476	-	149
1	295234333	295234471	-	138
1	295234335	295234468	-	133
1	29851718	29851839	-	121
1	29888252	29888358	-	106
1	30101459	30101676	+	217
1	30101460	30101676	-	216
1	30101465	30101670	+	205
1	30101470	30101665	+	195
1	30101490	30101644	+	154
1	30101500	30101633	+	133
1	30101503	30101631	+	128
1	30101508	30101625	+	117
1	30101512	30101622	+	110
1	30101514	30101619	+	105
1	30101523	30101610	+	87
1	303162	303246	+	84
1	30494970	30495060	+	90
1	3176418	3176476	+	58
1	31870977	31871179	-	202
1	31870986	31871169	+	183
1	31870986	31871170	-	184
1	31870990	31871165	-	175
1	31871008	31871147	-	139
1	31871019	31871136	-	117
1	31871026	31871129	-	103
1	31871044	31871112	-	68
1	32026221	32026343	-	122
1	32358364	32358458	-	94
1	32826047	32826157	-	110
1	32826058	32826153	-	95
1	32826061	32826148	-	87
1	33076566	33076782	-	216
1	33076572	33076776	+	204
1	33076582	33076767	-	185
1	33076597	33076751	-	154
1	33076611	33076737	-	126
1	33774716	33774791	-	75
1	33774718	33774789	-	71
1	35390723	35390866	-	143
1	36731646	36731862	-	216
1	36731651	36731857	-	206
1	36731656	36731851	-	195
1	36731700	36731865	+	165
1	37524319	37524403	-	84
1	37811245	37811367	+	122
1	37844179	37844240	+	61
1	37898918	37899008	-	90
1	38434652	38434869	-	217
1	38434662	38434859	-	197
1	39058209	39058279	-	70
1	39259576	39259708	+	132
1	39740473	39740539	-	66
1	39740473	39740541	-	68
1	41056203	41056420	-	217
1	41081809	41081938	+	129
1	41081813	41081934	-	121
1	41398712	41398812	-	100
1	41423490	41423578	+	88
1	43078009	43078097	+	88
1	43506237	43506303	-	66
1	43506242	43506296	-	54
1	43516470	43516583	+	113
1	4352777	4352833	+	56
1	43634933	43635000	+	67
1	43634940	43634994	+	54
1	43750971	43751188	-	217
1	43979837	43980054	+	217
1	44445717	44445897	+	180
1	44445726	44445889	+	163
1	44445747	44445871	+	124
1	44755735	44755825	+	90
1	45199741	45199948	-	207
1	45199746	45199938	-	192
1	45199754	45199928	-	174
1	45199755	45199928	+	173
1	45199763	45199919	-	156
1	45199769	45199913	+	144
1	45199770	45199913	-	143
1	45199790	45199893	-	103
1	46123074	46123286	-	212
1	46246790	46246844	+	54
1	46306471	46306525	+	54
1	46508697	46508767	+	70
1	46737252	46737364	+	112
1	46737259	46737355	+	96
1	47036138	47036355	+	217
1	47036160	47036332	+	172
1	47158847	47159064	-	217
1	47158870	47159042	-	172
1	47212429	47212646	+	217
1	47212430	47212646	-	216
1	47212431	47212643	-	212
1	47212436	47212639	+	203
1	47212443	47212632	-	189
1	47212458	47212617	-	159
1	47401310	47401526	+	216
1	47401310	47401527	-	217
1	47401313	47401525	+	212
1	47401317	47401520	-	203
1	47401324	47401513	+	189
1	47401339	47401498	+	159
1	47556752	47556828	+	76
1	47845387	47845488	-	101
1	47845395	47845481	-	86
1	47953230	47953317	-	87
1	48073937	48074024	+	87
1	50123470	50123679	-	209
1	50360069	50360286	+	217
1	50360070	50360285	-	215
1	50360074	50360281	+	207
1	50360074	50360281	-	207
1	50360084	50360270	+	186
1	50360093	50360261	+	168
1	50360106	50360248	+	142
1	50360112	50360243	-	131
1	50360126	50360229	+	103
1	50360135	50360221	+	86
1	52680245	52680357	-	112
1	53110076	53110157	-	81
1	53115718	53115814	+	96
1	5407011	5407072	-	61
1	55292927	55293103	+	176
1	55292930	55293100	+	170
1	5548369	5548451	-	82
1	5548378	5548438	-	60
1	55762337	55762445	+	108
1	55762342	55762438	+	96
1	56037632	56037720	-	88
1	56635310	56635429	+	119
1	56647338	56647546	-	208
1	56647352	56647532	-	180
1	56874056	56874264	-	208
1	56874069	56874250	-	181
1	56943834	56943946	-	112
1	57052156	57052372	-	216
1	57052159	57052368	-	209
1	57052174	57052353	-	179
1	57052180	57052348	-	168
1	57052192	57052334	-	142
1	57052197	57052331	-	134
1	57052207	57052320	-	113
1	57073988	57074094	+	106
1	57939679	57939736	-	57
1	58051455	58051512	+	57
1	58681573	58681776	-	203
1	58681582	58681766	-	184
1	58838973	58839180	+	207
1	59884547	59884763	+	216
1	59884555	59884755	+	200
1	59884563	59884749	+	186
1	59884566	59884745	+	179
1	59884572	59884739	+	167
1	59884574	59884737	+	163
1	59884584	59884726	+	142
1	59884596	59884715	+	119
1	59884603	59884708	+	105
1	59921444	59921658	-	214
1	59921451	59921652	-	201
1	60041078	60041161	+	83
1	60041377	60041594	+	217
1	60041391	60041579	+	188
1	61142073	61142185	-	112
1	61402605	61402682	-	77
1	61647720	61647936	-	216
1	61647723	61647933	+	210
1	61647732	61647924	+	192
1	61647736	61647920	+	184
1	61647742	61647914	+	172
1	61647748	61647908	+	160
1	61647749	61647907	-	158
1	61647755	61647902	+	147
1	61844334	61844550	-	216
1	61844337	61844547	+	210
1	61844346	61844538	+	192
1	61844350	61844534	+	184
1	61844356	61844528	+	172
1	61844356	61844529	-	173
1	61844362	61844522	+	160
1	61844363	61844521	-	158
1	61844368	61844516	-	148
1	61844369	61844516	+	147
1	62593259	62593323	+	64
1	62746018	62746082	+	64
1	62777187	62777404	-	217
1	62777209	62777383	-	174
1	62777225	62777368	-	143
1	62777229	62777362	-	133
1	62777235	62777356	-	121
1	63539657	63539745	+	88
1	63603139	63603199	-	60
1	63752194	63752255	+	61
1	63753603	63753663	+	60
1	64953708	64953838	+	130
1	66160615	66160685	+	70
1	66824947	66825020	+	73
1	66835041	66835098	-	57
1	6750904	6751118	-	214
1	6750909	6751115	-	206
1	6750912	6751111	-	199
1	6750919	6751104	-	185
1	67581288	67581385	-	97
1	69587804	69588021	+	217
1	69590190	69590340	-	150
1	69590203	69590327	-	124
1	69830649	69830828	-	179
1	69830658	69830819	-	161
1	69830663	69830813	-	150
1	69830677	69830799	+	122
1	73017569	73017654	+	85
1	73017569	73017654	-	85
1	74002609	74002728	-	119
1	74584803	74585003	+	200
1	74584810	74584996	+	186
1	74584825	74584982	+	157
1	74584829	74584977	+	148
1	74584832	74584975	+	143
1	74584841	74584965	+	124
1	74584843	74584965	+	122
1	74596835	74597051	+	216
1	74596837	74597047	+	210
1	74596858	74597027	+	169
1	74596864	74597021	+	157
1	74806881	74807018	-	137
1	74881051	74881144	+	93
1	74881064	74881131	+	67
1	74881066	74881129	-	63
1	75019938	75020097	+	159
1	75019953	75020084	+	131
1	75019959	75020082	+	123
1	75019963	75020075	+	112
1	75170751	75170825	-	74
1	75370043	75370127	+	84
1	7553343	7553464	+	121
1	7564026	7564168	+	142
1	7564037	7564158	+	121
1	75759724	75759940	+	216
1	75759734	75759929	+	195
1	75759739	75759924	+	185
1	75759752	75759911	+	159
1	76057922	76058032	-	110
1	76090812	76090949	-	137
1	76357969	76358185	+	216
1	76357969	76358185	-	216
1	76357976	76358178	-	202
1	76357994	76358160	+	166
1	76358011	76358143	+	132
1	76814203	76814418	-	215
1	76814211	76814410	-	199
1	76814245	76814384	-	139
1	77422241	77422340	-	99
1	77624963	77625179	+	216
1	77624963	77625179	-	216
1	77624984	77625157	+	173
1	77624984	77625158	-	174
1	77624987	77625155	+	168
1	77624993	77625150	-	157
1	77625005	77625137	+	132
1	77625006	77625137	-	131
1	77625009	77625134	+	125
1	77625020	77625122	+	102
1	77625026	77625116	+	90
1	77709313	77709529	-	216
1	77709318	77709524	+	206
1	77709323	77709519	+	196
1	77709329	77709513	+	184
1	77709342	77709499	+	157
1	77709346	77709496	+	150
1	77895596	77895749	+	153
1	78420055	78420268	+	213
1	78420066	78420257	+	191
1	78420073	78420249	+	176
1	79200114	79200330	-	216
1	79200115	79200329	+	214
1	79242142	79242243	-	101
1	79594777	79594847	+	70
1	79594777	79594847	-	70
1	79702995	79703078	-	83
1	79753776	79753846	-	70
1	80044326	80044543	+	217
1	80044335	80044534	+	199
1	80044352	80044517	+	165
1	80438998	80439112	-	114
1	81388823	81388905	-	82
1	81422222	81422304	-	82
1	82766839	82767030	+	191
1	82766851	82767022	+	171
1	82766857	82767013	+	156
1	82766858	82767012	-	154
1	82766866	82767005	-	139
1	82766869	82767002	+	133
1	82766869	82767002	-	133
1	82766873	82766998	-	125
1	82766878	82766991	+	113
1	83264496	83264711	+	215
1	83264512	83264689	+	177
1	83264532	83264669	+	137
1	83425325	83425527	+	202
1	83425340	83425512	+	172
1	83425344	83425507	+	163
1	83478028	83478245	-	217
1	83478029	83478244	+	215
1	83478053	83478219	+	166
1	83478054	83478220	-	166
1	83478062	83478211	+	149
1	83478062	83478212	-	150
1	83478069	83478204	+	135
1	83478070	83478204	-	134
1	83478080	83478192	+	112
1	83478094	83478179	+	85
1	85050653	85050767	-	114
1	85661886	85661972	-	86
1	8650795	8651011	+	216
1	8650795	8651011	-	216
1	8650797	8651010	+	213
1	8695626	8695830	+	204
1	8695655	8695800	+	145
1	87072762	87072976	-	214
1	87072772	87072965	-	193
1	87072795	87072942	+	147
1	87072800	87072938	+	138
1	87072803	87072934	+	131
1	87207959	87208031	+	72
1	87364327	87364388	-	61
1	8768717	8768807	-	90
1	8768719	8768804	-	85
1	8796388	8796604	+	216
1	8796389	8796604	-	215
1	8796402	8796589	-	187
1	8796406	8796586	-	180
1	8796407	8796585	+	178
1	8796431	8796562	-	131
1	8827463	8827595	-	132
1	8827467	8827589	-	122
1	88376268	88376395	-	127
1	88376272	88376391	+	119
1	88376272	88376391	-	119
1	88376288	88376374	+	86
1	88376293	88376370	+	77
1	9024591	9024717	-	126
1	9024602	9024706	-	104
1	91232216	91232288	-	72
1	91757728	91757869	+	141
1	92296826	92296927	+	101
1	92296835	92296916	+	81
1	92341711	92341812	-	101
1	92341722	92341803	-	81
1	9257783	9257925	-	142
1	9257792	9257916	-	124
1	9257798	9257910	-	112
1	9257804	9257904	-	100
1	9257809	9257900	-	91
1	9257814	9257894	-	80
1	93700984	93701189	+	205
1	93700990	93701183	+	193
1	93700993	93701181	+	188
1	93700997	93701176	+	179
1	93701019	93701154	+	135
1	93701030	93701143	+	113
1	93701036	93701137	+	101
1	93701039	93701134	+	95
1	93701043	93701130	+	87
1	94209556	94209663	-	107
1	94209560	94209657	-	97
1	94910026	94910234	+	208
1	94910029	94910231	+	202
1	94910055	94910198	+	143
1	94910060	94910194	+	134
1	95087311	95087401	-	90
1	95733430	95733515	+	85
1	95884910	95884979	-	69
1	96430668	96430766	-	98
1	96604717	96604831	+	114
1	97539491	97539617	-	126
1	97539499	97539610	-	111
1	97539503	97539605	-	102
1	97539517	97539592	-	75
1	97598378	97598475	+	97
1	98090904	98091114	-	210
1	98090907	98091110	-	203
1	98090909	98091107	-	198
1	98090911	98091104	-	193
1	98142851	98143058	+	207
1	98142867	98143042	+	175
1	98142896	98143008	-	112
1	98226617	98226824	-	207
1	98226633	98226808	-	175
1	98737152	98737264	+	112
1	98737155	98737262	+	107
1	99376369	99376553	-	184
1	99586040	99586224	-	184
1	99709485	99709696	-	211
1	99709490	99709691	+	201
1	99751085	99751161	-	76
10	10137203	10137276	-	73
10	10729780	10729962	-	182
10	10885208	10885390	-	182
10	10978504	10978720	+	216
10	10978504	10978720	-	216
10	10978508	10978716	-	208
10	10978512	10978712	+	200
10	10978512	10978712	-	200
10	10978519	10978706	+	187
10	10978528	10978697	-	169
10	10978535	10978689	+	154
10	10978545	10978679	+	134
10	10978557	10978666	+	109
10	11890927	11891022	-	95
10	12121276	12121408	-	132
10	1213831	1214009	-	178
10	1214002	1214080	+	78
10	1221067	1221162	+	95
10	12937479	12937692	+	213
10	12937495	12937674	-	179
10	12937502	12937669	+	167
10	12937505	12937666	+	161
10	12937531	12937639	+	108
10	1347054	1347119	+	65
10	13542366	13542582	-	216
10	13542390	13542557	-	167
10	13542395	13542553	-	158
10	13542399	13542549	-	150
10	13542405	13542543	-	138
10	13767945	13768093	+	148
10	13767946	13768092	-	146
10	13875826	13876035	-	209
10	13875837	13876020	-	183
10	13875837	13876023	-	186
10	13875843	13876018	-	175
10	13875854	13876008	-	154
10	13875857	13876004	-	147
10	13875858	13876003	+	145
10	13875869	13875992	+	123
10	13888997	13889213	+	216
10	14028143	14028296	-	153
10	1419251	1419364	+	113
10	14201511	14201727	-	216
10	14201530	14201709	-	179
10	14201532	14201706	-	174
10	14491985	14492201	+	216
10	14492003	14492182	+	179
10	14492006	14492180	+	174
10	1461100	1461170	+	70
10	1467245	1467356	+	111
10	1467253	1467349	+	96
10	1468068	1468176	+	108
10	1468074	1468172	+	98
10	15369366	15369496	+	130
10	15938782	15938886	-	104
10	17354054	17354193	-	139
10	17354060	17354186	-	126
10	17354071	17354174	-	103
10	1806015	1806121	+	106
10	1806023	1806114	+	91
10	18378658	18378842	+	184
10	18378667	18378833	+	166
10	18378674	18378829	+	155
10	18701748	18701964	+	216
10	18701752	18701963	+	211
10	18701754	18701959	+	205
10	18701762	18701947	+	185
10	18701773	18701940	+	167
10	18701783	18701930	+	147
10	18701807	18701906	+	99
10	18701814	18701899	+	85
10	18957355	18957475	+	120
10	20393762	20393978	-	216
10	21315217	21315428	+	211
10	21315228	21315416	+	188
10	21350125	21350201	+	76
10	22092366	22092536	-	170
10	22092417	22092521	-	104
10	24916196	24916385	-	189
10	24973375	24973589	-	214
10	24973381	24973582	-	201
10	25576469	25576624	+	155
10	25576478	25576616	+	138
10	25576483	25576610	+	127
10	25576486	25576609	+	123
10	2602805	2602868	+	63
10	26181338	26181460	+	122
10	26181346	26181450	+	104
10	26181354	26181443	+	89
10	26181358	26181439	-	81
10	26283709	26283815	-	106
10	2647649	2647799	+	150
10	26700808	26700902	-	94
10	26740675	26740773	+	98
10	26850783	26850867	+	84
10	27172562	27172776	-	214
10	27172569	27172769	-	200
10	27172598	27172741	-	143
10	27172619	27172719	+	100
10	27172625	27172714	+	89
10	27279152	27279352	-	200
10	27279155	27279348	-	193
10	27279158	27279345	-	187
10	27279164	27279340	-	176
10	27279170	27279334	-	164
10	27279175	27279328	-	153
10	27279178	27279326	-	148
10	27279184	27279320	-	136
10	27527319	27527387	+	68
10	27574704	27574919	-	215
10	27574704	27574920	+	216
10	27574710	27574913	+	203
10	27574710	27574914	-	204
10	27574725	27574899	+	174
10	27574736	27574888	+	152
10	27574741	27574883	+	142
10	27574744	27574882	+	138
10	27574747	27574878	+	131
10	27574759	27574865	+	106
10	27574764	27574861	+	97
10	27714038	27714105	-	67
10	28806805	28806893	+	88
10	2913395	2913583	-	188
10	2913404	2913575	-	171
10	2913413	2913566	-	153
10	2913419	2913560	-	141
10	2913426	2913553	-	127
10	2913432	2913547	-	115
10	2913436	2913542	-	106
10	2913441	2913538	-	97
10	2913447	2913532	-	85
10	2913570	2913713	+	143
10	2916593	2916712	+	119
10	30042896	30042964	-	68
10	31018417	31018518	-	101
10	31079668	31079809	-	141
10	31079679	31079798	+	119
10	31079679	31079798	-	119
10	31079689	31079787	+	98
10	31082914	31083130	+	216
10	31082932	31083112	+	180
10	31216739	31216955	+	216
10	31341679	31341763	+	84
10	31717840	31717934	+	94
10	31717928	31718119	+	191
10	31757827	31757895	-	68
10	31868365	31868573	-	208
10	31868371	31868568	-	197
10	31868382	31868556	-	174
10	31868390	31868549	-	159
10	31868396	31868542	+	146
10	31868396	31868542	-	146
10	31868400	31868538	-	138
10	31868419	31868520	-	101
10	31868432	31868507	+	75
10	32424150	32424236	+	86
10	32558374	32558565	+	191
10	32558383	32558557	+	174
10	32558410	32558530	+	120
10	32896082	32896273	+	191
10	32896091	32896266	+	175
10	32896097	32896259	+	162
10	32896118	32896238	+	120
10	33318370	33318424	+	54
10	33320523	33320680	+	157
10	34048130	34048311	+	181
10	34932270	34932352	+	82
10	35545163	35545265	-	102
10	35545164	35545265	+	101
10	35545171	35545258	+	87
10	35545174	35545255	+	81
10	35545183	35545245	+	62
10	35547119	35547194	+	75
10	3588376	3588514	+	138
10	36994959	36995170	-	211
10	36994968	36995162	-	194
10	36994976	36995153	-	177
10	36994997	36995133	-	136
10	37167698	37167818	+	120
10	37320513	37320593	+	80
10	37492691	37492908	-	217
10	37492698	37492901	-	203
10	37492708	37492890	-	182
10	37492712	37492888	-	176
10	37492717	37492882	-	165
10	37492726	37492873	+	147
10	37502838	37502910	-	72
10	37502843	37502905	-	62
10	37863856	37863939	-	83
10	37924173	37924249	+	76
10	37924177	37924245	+	68
10	38222549	38222703	-	154
10	38222551	38222700	-	149
10	38222556	38222695	-	139
10	39161002	39161215	-	213
10	39161027	39161190	-	163
10	39161031	39161188	-	157
10	39161050	39161168	-	118
10	40090896	40091112	+	216
10	40090907	40091103	+	196
10	40090910	40091100	+	190
10	40090922	40091091	+	169
10	40090922	40091091	-	169
10	40090930	40091082	-	152
10	40090930	40091083	+	153
10	40090934	40091079	+	145
10	40090941	40091072	+	131
10	4096729	4096826	+	97
10	41506243	41506328	-	85
10	41776714	41776825	-	111
10	42602992	42603146	-	154
10	42602995	42603144	-	149
10	42805549	42805657	+	108
10	42805553	42805653	+	100
10	43235938	43236146	-	208
10	43235940	43236143	+	203
10	43235956	43236126	-	170
10	43235962	43236120	+	158
10	43235963	43236120	-	157
10	43235970	43236112	-	142
10	43235970	43236113	+	143
10	43235978	43236106	-	128
10	43235987	43236095	-	108
10	43235996	43236087	-	91
10	43452526	43452636	-	110
10	43597879	43597936	-	57
10	44204649	44204749	-	100
10	44538748	44538965	-	217
10	44858601	44858723	-	122
10	44916169	44916268	-	99
10	44916171	44916265	-	94
10	45137896	45138031	+	135
10	45137905	45138026	+	121
10	45137909	45137972	+	63
10	45137911	45137972	+	61
10	45276189	45276274	-	85
10	45276195	45276270	-	75
10	45994145	45994224	-	79
10	4614456	4614520	-	64
10	46245063	46245154	+	91
10	46291034	46291131	-	97
10	47287	47384	+	97
10	47291	47380	+	89
10	47390099	47390196	+	97
10	47390106	47390191	+	85
10	47390109	47390189	+	80
10	47390121	47390177	+	56
10	47452542	47452639	+	97
10	47452549	47452634	+	85
10	47452552	47452632	+	80
10	47452564	47452620	+	56
10	47741857	47742073	-	216
10	47741868	47742062	-	194
10	47741893	47742037	-	144
10	47795298	47795459	-	161
10	47795310	47795447	-	137
10	47795313	47795443	-	130
10	47824296	47824513	-	217
10	48371426	48371630	-	204
10	48371433	48371622	-	189
10	48371439	48371617	-	178
10	48402232	48402448	-	216
10	48402233	48402448	+	215
10	48402239	48402443	-	204
10	48402251	48402430	-	179
10	48402268	48402413	-	145
10	48402272	48402409	-	137
10	48417046	48417262	+	216
10	48417057	48417252	+	195
10	48417061	48417246	+	185
10	48417065	48417242	+	177
10	48417083	48417225	+	142
10	48417094	48417213	+	119
10	49413730	49413793	+	63
10	49515398	49515500	-	102
10	49515402	49515496	-	94
10	50768013	50768148	+	135
10	51008422	51008508	-	86
10	51070294	51070429	-	135
10	51282384	51282525	-	141
10	51282416	51282494	+	78
10	5219521	5219635	-	114
10	5219525	5219631	-	106
10	5219919	5220019	+	100
10	52378153	52378288	-	135
10	52378163	52378276	-	113
10	52479204	52479263	+	59
10	52754236	52754450	-	214
10	52754240	52754445	-	205
10	52754246	52754439	-	193
10	52754260	52754424	-	164
10	53136501	53136715	+	214
10	53136501	53136716	-	215
10	53136506	53136709	-	203
10	53136508	53136707	-	199
10	53136513	53136702	+	189
10	53136513	53136703	-	190
10	53136515	53136702	+	187
10	53136517	53136698	-	181
10	53136525	53136691	+	166
10	53136528	53136688	+	160
10	53136532	53136684	-	152
10	53136540	53136677	+	137
10	53136546	53136670	+	124
10	53136563	53136653	-	90
10	53599287	53599365	+	78
10	53743395	53743610	-	215
10	53743400	53743605	-	205
10	54193306	54193418	-	112
10	57905848	57905911	-	63
10	58168939	58169009	-	70
10	58343875	58344041	-	166
10	58343880	58344036	-	156
10	58343901	58344015	-	114
10	58527709	58527924	+	215
10	58527719	58527913	+	194
10	58527729	58527905	+	176
10	58527731	58527901	+	170
10	58527737	58527896	+	159
10	58527747	58527885	+	138
10	59102051	59102113	-	62
10	59134026	59134088	+	62
10	59421727	59421782	+	55
10	60387568	60387641	-	73
10	60387568	60387643	-	75
10	6043298	6043396	+	98
10	60584605	60584717	-	112
10	60584606	60584717	+	111
10	61062180	61062395	-	215
10	61062185	61062390	-	205
10	61226502	61226717	-	215
10	61226507	61226712	-	205
10	61765068	61765285	-	217
10	61765076	61765278	-	202
10	61765083	61765270	-	187
10	61765099	61765254	-	155
10	61765106	61765247	-	141
10	62946831	62946938	+	107
10	63283024	63283119	-	95
10	63283033	63283110	-	77
10	63283037	63283106	-	69
10	63329034	63329106	-	72
10	63329036	63329103	-	67
10	63649858	63649929	-	71
10	64926410	64926505	+	95
10	65021657	65021846	+	189
10	65142391	65142489	+	98
10	65335790	65335878	-	88
10	6604111	6604208	-	97
10	66358149	66358224	+	75
10	6640597	6640695	-	98
10	66469214	66469289	+	75
10	6791007	6791188	+	181
10	6999585	6999702	-	117
10	7083105	7083188	+	83
10	7357534	7357654	+	120
10	8203246	8203329	+	83
10	845037	845104	-	67
10	860673	860776	+	103
10	861623	861757	+	134
10	8728701	8728835	+	134
11	10552843	10552937	-	94
11	10737518	10737735	-	217
11	10737524	10737726	-	202
11	10737535	10737713	-	178
11	10737548	10737700	-	152
11	10737558	10737690	-	132
11	11474144	11474258	+	114
11	11522232	11522286	+	54
11	11620831	11620930	-	99
11	11620838	11620923	-	85
11	1295965	1296180	+	215
11	1295965	1296181	-	216
11	1295968	1296177	-	209
11	14062862	14062974	+	112
11	14073256	14073464	+	208
11	15222347	15222551	-	204
11	15371004	15371220	+	216
11	15371009	15371214	+	205
11	15485508	15485721	-	213
11	15485511	15485717	-	206
11	15568172	15568385	-	213
11	15568175	15568381	-	206
11	1563352	1563568	+	216
11	1563353	1563568	-	215
11	1563356	1563565	+	209
11	16490352	16490566	+	214
11	17059125	17059188	-	63
11	17199349	17199412	-	63
11	17567521	17567736	-	215
11	17567522	17567737	+	215
11	17567530	17567728	+	198
11	17567533	17567725	-	192
11	17567535	17567723	+	188
11	17567545	17567713	+	168
11	17567555	17567703	+	148
11	17567562	17567696	+	134
11	18199938	18200107	-	169
11	18199950	18200094	-	144
11	18349324	18349538	+	214
11	18349347	18349524	+	177
11	18349366	18349505	-	139
11	18349367	18349502	-	135
11	18349370	18349500	+	130
11	18349385	18349483	+	98
11	18533898	18534009	-	111
11	18993233	18993336	-	103
11	19023497	19023581	+	84
11	19040826	19040939	+	113
11	19218320	19218400	+	80
11	20030712	20030787	-	75
11	20030714	20030783	-	69
11	20232913	20233129	-	216
11	20232914	20233127	+	213
11	20232918	20233124	-	206
11	20232919	20233124	+	205
11	20232945	20233097	-	152
11	20232968	20233074	+	106
11	20656769	20656981	+	212
11	20656769	20656981	-	212
11	20656791	20656960	-	169
11	20656798	20656953	+	155
11	20656805	20656944	+	139
11	2165794	2165854	-	60
11	2205446	2205506	+	60
11	22930015	22930181	+	166
11	24353462	24353679	-	217
11	24353469	24353672	-	203
11	24353470	24353671	+	201
11	24662757	24662960	+	203
11	24662778	24662939	+	161
11	25842174	25842256	-	82
11	26638279	26638495	-	216
11	26645418	26645498	-	80
11	26645425	26645491	-	66
11	26694057	26694149	-	92
11	26901111	26901205	-	94
11	26901116	26901200	-	84
11	27020570	27020659	+	89
11	27165752	27165928	+	176
11	28334095	28334193	+	98
11	29406790	29406938	-	148
11	29591294	29591353	-	59
11	31094292	31094369	+	77
11	31557811	31557885	-	74
11	35013223	35013438	-	215
11	36362561	36362663	-	102
11	3776434	3776527	-	93
11	3895173	3895266	+	93
11	39393233	39393450	-	217
11	39393244	39393438	+	194
11	39393248	39393436	-	188
11	39393256	39393426	+	170
11	39393258	39393424	-	166
11	39393261	39393421	+	160
11	39393296	39393387	+	91
11	39393301	39393382	+	81
11	3989549	3989625	-	76
11	4073424	4073517	+	93
11	41889651	41889746	+	95
11	4265368	4265516	-	148
11	4265373	4265513	-	140
11	43303274	43303487	-	213
11	43303280	43303481	-	201
11	43303328	43303434	-	106
11	43903177	43903390	-	213
11	43903180	43903387	-	207
11	43903194	43903373	+	179
11	43903195	43903372	-	177
11	43903201	43903366	-	165
11	43903206	43903361	-	155
11	43903207	43903361	+	154
11	43903214	43903353	-	139
11	43903222	43903345	-	123
11	43903238	43903330	-	92
11	43903243	43903324	-	81
11	43985410	43985623	-	213
11	43985413	43985620	-	207
11	43985427	43985606	+	179
11	43985428	43985605	-	177
11	43985434	43985599	-	165
11	43985439	43985594	-	155
11	43985440	43985594	+	154
11	43985447	43985586	-	139
11	43985455	43985578	-	123
11	43985471	43985563	-	92
11	43985476	43985557	-	81
11	44064700	44064835	-	135
11	44147768	44147985	-	217
11	44147784	44147969	-	185
11	44147796	44147955	-	159
11	44147804	44147947	+	143
11	44147808	44147944	+	136
11	44975848	44976064	-	216
11	46436207	46436382	+	175
11	46436231	46436357	+	126
11	47835756	47835968	-	212
11	47912937	47913000	-	63
11	48030912	48030977	-	65
11	48033298	48033414	-	116
11	48033310	48033398	-	88
11	48896721	48896929	-	208
11	48896726	48896923	-	197
11	48896736	48896913	+	177
11	48896738	48896912	-	174
11	48896744	48896905	+	161
11	48896750	48896900	+	150
11	48896761	48896890	+	129
11	48896770	48896880	+	110
11	48896777	48896874	+	97
11	48896788	48896862	+	74
11	48896797	48896854	+	57
11	49057320	49057398	+	78
11	49184472	49184650	+	178
11	49184484	49184637	+	153
11	49184495	49184627	+	132
11	49184507	49184615	+	108
11	49786905	49787121	-	216
11	49786940	49787087	-	147
11	49786947	49787080	-	133
11	49786962	49787066	-	104
11	49786965	49787063	-	98
11	49786969	49787060	-	91
11	49889659	49889778	+	119
11	51838867	51838977	+	110
11	52230206	52230394	-	188
11	52230230	52230371	+	141
11	52230231	52230371	-	140
11	52230239	52230362	-	123
11	52230242	52230360	+	118
11	52230248	52230353	+	105
11	52230260	52230341	-	81
11	53963478	53963677	-	199
11	53963485	53963670	-	185
11	53963491	53963663	-	172
11	53963501	53963657	-	156
11	54020343	54020542	-	199
11	54020350	54020535	-	185
11	54020356	54020528	-	172
11	54020366	54020522	-	156
11	54087469	54087542	+	73
11	54182250	54182323	+	73
11	56178765	56178861	-	96
11	56298592	56298688	+	96
11	56974742	56974823	+	81
11	57181584	57181800	-	216
11	57216414	57216495	-	81
11	57957049	57957264	-	215
11	57957055	57957257	-	202
11	57957066	57957242	-	176
11	59278531	59278633	+	102
11	59556684	59556824	+	140
11	59556687	59556820	-	133
11	59556695	59556812	-	117
11	60972882	60973001	+	119
11	61305070	61305143	-	73
11	61468730	61468852	+	122
11	63132169	63132230	-	61
11	63310196	63310305	+	109
11	63310200	63310301	+	101
11	63397219	63397315	-	96
11	63397228	63397302	+	74
11	63472737	63472844	-	107
11	63517115	63517211	-	96
11	63517124	63517198	+	74
11	64665432	64665648	+	216
11	64665432	64665648	-	216
11	64665438	64665643	+	205
11	64665443	64665638	-	195
11	64665459	64665621	-	162
11	64665460	64665619	-	159
11	64665460	64665620	+	160
11	64932756	64932939	-	183
11	64932757	64932939	+	182
11	64932762	64932932	+	170
11	64932769	64932927	+	158
11	65158936	65158996	-	60
11	65302444	65302528	+	84
11	65474607	65474743	-	136
11	65851487	65851616	-	129
11	65922405	65922558	+	153
11	66010493	66010603	+	110
11	66560549	66560740	-	191
11	66560561	66560727	-	166
11	68109851	68109929	-	78
11	68226091	68226187	-	96
11	68350970	68351048	-	78
11	68931150	68931232	-	82
11	69101456	69101610	-	154
11	69101466	69101600	-	134
11	69101477	69101589	-	112
11	69101483	69101582	-	99
11	69306347	69306440	-	93
11	69434916	69435131	+	215
11	69434924	69435123	+	199
11	69434942	69435103	+	161
11	69687998	69688213	+	215
11	72230460	72230545	-	85
11	72359062	72359144	+	82
11	72464646	72464754	-	108
11	74709948	74710042	+	94
11	74709951	74710039	+	88
11	74761093	74761168	-	75
11	76358439	76358521	-	82
11	76502735	76502823	-	88
11	76502743	76502813	-	70
11	77595687	77595770	-	83
11	78928337	78928395	+	58
11	79375562	79375777	-	215
11	79416438	79416554	+	116
11	79416442	79416549	+	107
11	8284241	8284458	+	217
11	8739405	8739504	-	99
11	9634492	9634703	+	211
11	9634496	9634698	+	202
11	9634507	9634687	+	180
11	9844604	9844820	+	216
11	9844616	9844808	+	192
11	9844631	9844793	-	162
11	9844635	9844790	+	155
12	10411014	10411068	+	54
12	11570712	11570841	-	129
12	11570722	11570830	-	108
12	11570729	11570823	-	94
12	12049532	12049748	-	216
12	12049545	12049736	-	191
12	12049550	12049731	-	181
12	12049555	12049726	-	171
12	12069370	12069499	-	129
12	12153814	12154030	+	216
12	12153819	12154025	+	206
12	12153830	12154014	+	184
12	12153833	12154012	+	179
12	12153843	12154003	+	160
12	12301327	12301542	-	215
12	12461185	12461314	+	129
12	12461189	12461310	+	121
12	12461194	12461306	+	112
12	12692654	12692758	-	104
12	12692657	12692754	-	97
12	12891627	12891783	+	156
12	12927798	12928014	+	216
12	13003398	13003611	+	213
12	13003411	13003598	+	187
12	13003417	13003592	+	175
12	13003440	13003569	+	129
12	13003474	13003534	+	60
12	13003476	13003534	+	58
12	13783522	13783650	-	128
12	14047865	14047972	-	107
12	14047869	14047970	-	101
12	14163079	14163296	-	217
12	14483648	14483854	-	206
12	14581833	14582040	+	207
12	14581839	14582034	+	195
12	14581849	14582024	+	175
12	14581857	14582017	+	160
12	14628514	14628721	+	207
12	14628520	14628715	+	195
12	14628530	14628705	+	175
12	14628538	14628698	+	160
12	15111455	15111647	+	192
12	15111481	15111622	+	141
12	15197697	15197914	+	217
12	15197698	15197914	-	216
12	15197701	15197908	-	207
12	15197704	15197906	-	202
12	15197719	15197892	-	173
12	15244477	15244561	-	84
12	15253931	15254148	-	217
12	15253932	15254146	-	214
12	15253938	15254141	+	203
12	15253938	15254141	-	203
12	15253952	15254127	+	175
12	15253953	15254127	-	174
12	15253958	15254122	-	164
12	15253965	15254114	+	149
12	15253966	15254113	-	147
12	15253971	15254107	-	136
12	15253977	15254103	-	126
12	15253981	15254097	-	116
12	15253986	15254093	-	107
12	15253989	15254090	+	101
12	15253998	15254081	+	83
12	15294961	15295153	+	192
12	15294987	15295128	+	141
12	16269617	16269833	+	216
12	16269622	16269828	+	206
12	16682007	16682223	+	216
12	16682013	16682218	+	205
12	16682019	16682210	+	191
12	16682057	16682173	+	116
12	16682061	16682169	+	108
12	16888063	16888279	+	216
12	16888063	16888279	-	216
12	16888077	16888266	-	189
12	16888083	16888259	-	176
12	16888092	16888250	-	158
12	17054221	17054368	+	147
12	17392415	17392629	+	214
12	17392425	17392619	+	194
12	17450642	17450784	+	142
12	17450647	17450779	+	132
12	17450673	17450754	+	81
12	17787066	17787283	+	217
12	17787071	17787279	+	208
12	17787080	17787269	+	189
12	17787099	17787244	+	145
12	17787101	17787244	+	143
12	17787106	17787233	+	127
12	17787114	17787226	+	112
12	17787120	17787219	+	99
12	17788018	17788234	+	216
12	18426622	18426676	+	54
12	18444558	18444775	+	217
12	18444567	18444766	+	199
12	19370755	19370916	+	161
12	19382165	19382381	-	216
12	19382173	19382373	-	200
12	19382182	19382364	-	182
12	19382218	19382326	-	108
12	19500463	19500520	-	57
12	19539787	19539886	+	99
12	21248812	21248887	-	75
12	21369561	21369690	-	129
12	21369572	21369676	-	104
12	21412392	21412609	+	217
12	21412404	21412596	+	192
12	21412411	21412590	+	179
12	21412422	21412579	+	157
12	23210123	23210340	-	217
12	23210133	23210328	-	195
12	23210139	23210322	-	183
12	23210148	23210314	-	166
12	23210169	23210292	-	123
12	23210178	23210285	-	107
12	23607910	23608011	+	101
12	23607915	23608009	+	94
12	24235391	24235606	-	215
12	24235396	24235602	-	206
12	24235405	24235593	-	188
12	24235411	24235587	-	176
12	24235422	24235576	-	154
12	24235433	24235565	-	132
12	24235439	24235558	-	119
12	24235444	24235554	-	110
12	24290744	24290960	+	216
12	24290750	24290954	+	204
12	24482417	24482634	+	217
12	24482429	24482623	+	194
12	24482445	24482605	+	160
12	24482449	24482602	+	153
12	24571014	24571117	+	103
12	24942289	24942367	-	78
12	24942296	24942362	-	66
12	25001791	25001940	+	149
12	25001795	25001934	+	139
12	25001795	25001935	-	140
12	25001798	25001931	+	133
12	25001804	25001924	+	120
12	25001814	25001914	+	100
12	25001830	25001901	+	71
12	25115168	25115320	+	152
12	25115193	25115295	+	102
12	28023145	28023232	-	87
12	28524986	28525146	-	160
12	28524992	28525139	-	147
12	28525000	28525132	-	132
12	28552446	28552662	-	216
12	28606009	28606225	+	216
12	28606009	28606225	-	216
12	28606013	28606222	+	209
12	28606026	28606210	+	184
12	28606028	28606207	+	179
12	28606042	28606192	+	150
12	29803946	29804011	+	65
12	30381759	30381835	+	76
12	31300703	31300919	+	216
12	31783353	31783568	-	215
[truncated: 8,241 more rows]

## Sheet: Table B Microp._svm-candidates
Table S2. Hairpins predicted by Triplet-SVM and containing a putative binding site for Drosha. Putative Drosha binding site was calculated by Microprocessor SVM algorithm.
Chromosome	Hairpin start position	Hairpin end position	Genimic strand	Dimension of the hairpin (bp)
1	303175	303237	+	62
1	3176419	3176476	+	57
1	4352775	4352836	+	61
1	5407013	5407073	-	60
1	5548377	5548440	-	63
1	5548381	5548444	-	63
1	6750972	6751049	-	77
1	6750973	6751048	-	75
1	6750974	6751051	-	77
1	8650866	8650940	-	74
1	8650868	8650940	+	72
1	8695692	8695761	+	69
1	8796460	8796529	-	69
1	8796461	8796532	+	71
1	8796461	8796532	-	71
1	8796466	8796527	-	61
1	8796468	8796529	-	61
1	9024626	9024683	-	57
1	9257822	9257886	-	64
1	9257824	9257888	-	64
1	11395452	11395515	-	63
1	11737507	11737575	-	68
1	11737508	11737576	+	68
1	11737509	11737577	-	68
1	12108756	12108828	-	72
1	13943873	13943934	-	61
1	14370053	14370115	+	62
1	14672435	14672493	-	58
1	14672437	14672495	-	58
1	15153842	15153896	+	54
1	15254329	15254383	+	54
1	15323968	15324025	-	57
1	15499255	15499312	+	57
1	15850391	15850466	+	75
1	15869743	15869798	-	55
1	17591017	17591074	+	57
1	17667695	17667764	-	69
1	17667697	17667766	+	69
1	17667697	17667766	-	69
1	17818771	17818839	-	68
1	17818774	17818833	-	59
1	19642349	19642419	-	70
1	20142383	20142440	+	57
1	21809163	21809229	-	66
1	22760920	22760989	-	69
1	22925783	22925844	-	61
1	24032258	24032332	-	74
1	26235160	26235219	+	59
1	27225704	27225771	+	67
1	29129825	29129902	+	77
1	29129829	29129902	+	73
1	29851747	29851812	-	65
1	30101531	30101600	+	69
1	30101531	30101603	+	72
1	30101536	30101597	+	61
1	30494982	30495050	+	68
1	31871044	31871114	-	70
1	31871045	31871109	+	64
1	31871047	31871111	-	64
1	32826070	32826132	-	62
1	32826076	32826138	-	62
1	32826078	32826140	-	62
1	33076636	33076712	-	76
1	33076639	33076711	+	72
1	33076640	33076708	-	68
1	33076644	33076704	-	60
1	35390766	35390826	-	60
1	36731718	36731792	-	74
1	36731719	36731787	-	68
1	36731753	36731813	+	60
1	37811274	37811341	+	67
1	37844181	37844239	+	58
1	38434724	38434795	-	71
1	38434726	38434793	-	67
1	39058214	39058275	-	61
1	39259615	39259669	+	54
1	39740477	39740535	-	58
1	39740479	39740537	-	58
1	41056279	41056345	-	66
1	41081841	41081907	+	66
1	41081842	41081908	-	66
1	41398731	41398792	-	61
1	43506240	43506298	-	58
1	43506242	43506300	-	58
1	43516501	43516559	+	58
1	43634938	43634996	+	58
1	43751044	43751114	-	70
1	43979911	43979981	+	70
1	44445780	44445839	+	59
1	44755746	44755814	+	68
1	45199809	45199878	-	69
1	45199812	45199871	+	59
1	45199812	45199871	-	59
1	45199813	45199882	-	69
1	45199814	45199873	-	59
1	46123145	46123216	-	71
1	46246787	46246848	+	61
1	46306468	46306529	+	61
1	46508703	46508763	+	60
1	46737276	46737340	+	64
1	47036210	47036284	+	74
1	47036213	47036281	+	68
1	47158918	47158992	-	74
1	47158923	47158991	-	68
1	47212500	47212574	-	74
1	47212502	47212572	-	70
1	47212502	47212576	-	74
1	47212504	47212572	+	68
1	47212507	47212571	-	64
1	47401382	47401456	+	74
1	47401383	47401453	+	70
1	47401384	47401452	-	68
1	47401387	47401451	+	64
1	47556758	47556825	+	67
1	50123541	50123610	-	69
1	50360139	50360216	-	77
1	50360140	50360215	+	75
1	50360147	50360209	+	62
1	50360148	50360210	-	62
1	52680272	52680332	-	60
1	53115733	53115801	+	68
1	55292985	55293045	+	60
1	56635336	56635399	+	63
1	56943858	56943929	-	71
1	57052226	57052300	-	74
1	57052228	57052302	-	74
1	57074012	57074071	+	59
1	57939681	57939736	-	55
1	58051456	58051511	+	55
1	58681638	58681710	-	72
1	58681641	58681707	-	66
1	58839039	58839116	+	77
1	59884618	59884694	+	76
1	59884621	59884691	+	70
1	59884629	59884686	+	57
1	60041454	60041518	+	64
1	61142096	61142162	-	66
1	61647793	61647865	-	72
1	61647794	61647862	+	68
1	61647798	61647860	-	62
1	61844407	61844479	-	72
1	61844408	61844476	+	68
1	61844412	61844474	-	62
1	61844414	61844476	-	62
1	62593262	62593320	+	58
1	62746021	62746079	+	58
1	62777260	62777330	-	70
1	62777268	62777326	-	58
1	62777270	62777328	-	58
1	63603140	63603200	-	60
1	63752195	63752255	+	60
1	63753604	63753664	+	60
1	64953740	64953806	+	66
1	66835040	66835102	-	62
1	67581307	67581368	-	61
1	69587877	69587950	+	73
1	69590233	69590299	-	66
1	69830707	69830770	-	63
1	69830709	69830772	-	63
1	74002640	74002703	-	63
1	74584870	74584938	+	68
1	74584874	74584934	+	60
1	74596906	74596979	+	73
1	74596912	74596973	+	61
1	75019987	75020051	+	64
1	75759794	75759868	+	74
1	75759797	75759867	+	70
1	75759798	75759864	+	66
1	75759803	75759861	+	58
1	76057951	76058005	-	54
1	76090852	76090912	-	60
1	76358042	76358112	-	70
1	76358043	76358113	+	70
1	76358046	76358110	+	64
1	76814270	76814341	-	71
1	76814272	76814339	-	67
1	77625034	77625109	+	75
1	77625037	77625106	+	69
1	77625037	77625106	-	69
1	77625043	77625100	-	57
1	77625045	77625102	-	57
1	77709386	77709457	+	71
1	77709386	77709457	-	71
1	77709389	77709454	+	65
1	77895645	77895704	+	59
1	78420125	78420199	+	74
1	78420127	78420195	+	68
1	78420132	78420192	+	60
1	79200186	79200257	+	71
1	79200188	79200259	-	71
1	79242161	79242227	-	66
1	80044397	80044471	+	74
1	80044397	80044473	+	76
1	80044403	80044467	+	64
1	80439023	80439085	-	62
1	81388833	81388895	-	62
1	81422232	81422294	-	62
1	82766901	82766969	+	68
1	82766906	82766964	-	58
1	82766907	82766965	+	58
1	82766908	82766966	-	58
1	83264571	83264635	+	64
1	83264574	83264632	+	58
1	83425388	83425463	+	75
1	83425393	83425453	+	60
1	83478099	83478173	-	74
1	83478103	83478171	+	68
1	83478106	83478168	+	62
1	83478107	83478169	-	62
1	85661899	85661962	-	63
1	87072835	87072902	-	67
1	87072836	87072905	-	69
1	87072837	87072900	+	63
1	87207969	87208021	+	52
1	91757769	91757829	+	60
1	92296848	92296905	+	57
1	92341734	92341791	-	57
1	92341736	92341793	-	57
1	93701054	93701120	+	66
1	94209586	94209639	-	53
1	94209588	94209641	-	53
1	94910093	94910162	+	69
1	95087325	95087384	-	59
1	95733446	95733501	+	55
1	96604743	96604807	+	64
1	97539520	97539587	-	67
1	97539522	97539589	-	67
1	98090972	98091042	-	70
1	98090973	98091045	-	72
1	98090975	98091047	-	72
1	98737178	98737235	+	57
1	99376426	99376497	-	71
1	99586097	99586168	-	71
1	99709551	99709628	-	77
1	99709557	99709626	+	69
1	100385836	100385893	+	57
1	101137631	101137688	+	57
1	102795811	102795876	-	65
1	102898246	102898311	+	65
1	103804074	103804135	+	61
1	104637817	104637879	+	62
1	104886671	104886742	+	71
1	104886674	104886739	+	65
1	106219046	106219103	-	57
1	108918076	108918140	+	64
1	109231798	109231861	+	63
1	109598734	109598805	-	71
1	109598738	109598809	-	71
1	109857723	109857787	+	64
1	110391760	110391822	-	62
1	110491297	110491359	+	62
1	110611114	110611189	-	75
1	110611116	110611191	-	75
1	110611118	110611188	-	70
1	110611121	110611189	-	68
1	110617941	110618011	-	70
1	110682806	110682881	-	75
1	110682808	110682883	-	75
1	110682810	110682880	-	70
1	110682813	110682881	-	68
1	110689714	110689784	-	70
1	110768616	110768680	+	64
1	110771478	110771542	-	64
1	110771478	110771548	+	70
1	111357550	111357615	+	65
1	113307690	113307754	+	64
1	113677861	113677918	-	57
1	113935080	113935135	-	55
1	113935082	113935137	-	55
1	115689238	115689293	-	55
1	115697043	115697100	+	57
1	115876398	115876453	-	55
1	115884205	115884262	+	57
1	116874672	116874739	+	67
1	117034508	117034580	-	72
1	117034510	117034582	-	72
1	117034515	117034579	+	64
1	117656953	117657015	-	62
1	119447582	119447642	-	60
1	121263726	121263791	+	65
1	121263727	121263792	+	65
1	122710187	122710246	+	59
1	123721059	123721128	-	69
1	123721060	123721127	-	67
1	123721068	123721123	-	55
1	123858981	123859038	-	57
1	124407000	124407057	+	57
1	125738158	125738225	+	67
1	126156816	126156874	+	58
1	126157635	126157694	+	59
1	127917195	127917265	-	70
1	127917197	127917267	-	70
1	127917201	127917271	-	70
1	127917203	127917273	-	70
1	128779925	128779989	-	64
1	129694269	129694322	-	53
1	129699557	129699617	+	60
1	130447885	130447945	+	60
1	130568096	130568156	+	60
1	132473468	132473534	+	66
1	133813668	133813729	+	61
1	133879954	133880024	-	70
1	133879959	133880019	-	60
1	134398487	134398542	+	55
1	134543747	134543816	-	69
1	134970769	134970829	+	60
1	135242815	135242879	+	64
1	136121626	136121698	-	72
1	136121628	136121700	-	72
1	136121634	136121694	-	60
1	136121636	136121696	-	60
1	136425218	136425281	-	63
1	136792668	136792728	-	60
1	136805425	136805495	-	70
1	136805425	136805497	+	72
1	136805429	136805493	+	64
1	136805434	136805488	+	54
1	136849387	136849447	-	60
1	137210662	137210741	-	79
1	137210667	137210736	-	69
1	137309771	137309841	+	70
1	137309773	137309841	+	68
1	137309776	137309840	-	64
1	142482512	142482578	+	66
1	142683309	142683386	+	77
1	142683316	142683380	+	64
1	142878112	142878189	-	77
1	142878119	142878183	-	64
1	143777577	143777634	-	57
1	144986539	144986617	-	78
1	144986543	144986613	-	70
1	144986546	144986612	+	66
1	144986547	144986613	-	66
1	144986548	144986608	+	60
1	145482571	145482627	+	56
1	145698581	145698637	-	56
1	146333652	146333723	-	71
1	147052552	147052611	+	59
1	149834762	149834831	-	69
1	151427730	151427791	+	61
1	155557773	155557834	-	61
1	156034120	156034180	-	60
1	156358513	156358590	+	77
1	156358517	156358584	+	67
1	156358517	156358586	+	69
1	156358517	156358586	-	69
1	157591030	157591088	-	58
1	159663127	159663195	-	68
1	159663128	159663194	-	66
1	159663129	159663193	-	64
1	159663131	159663195	-	64
1	159786774	159786851	-	77
1	159786781	159786844	-	63
1	160716181	160716237	-	56
1	160868845	160868901	-	56
1	160868847	160868903	-	56
1	161112318	161112370	-	52
1	161454224	161454283	-	59
1	161520978	161521037	-	59
1	162553648	162553716	-	68
1	162553655	162553709	-	54
1	162553657	162553711	-	54
1	163786259	163786332	-	73
1	163786264	163786331	+	67
1	163939715	163939788	-	73
1	163939720	163939787	+	67
1	164354453	164354528	-	75
1	165028452	165028513	-	61
1	165187034	165187095	+	61
1	166724836	166724894	-	58
1	168328927	168329005	+	78
1	168328930	168328998	-	68
1	168328931	168328999	+	68
1	168613383	168613446	+	63
1	168852525	168852588	-	63
1	168852527	168852590	-	63
1	170436697	170436759	-	62
1	171822418	171822492	+	74
1	171857507	171857573	-	66
1	171964956	171965010	+	54
1	172159189	172159249	-	60
1	172162364	172162436	+	72
1	172402137	172402201	-	64
1	172402770	172402832	-	62
1	172465056	172465126	-	70
1	173196702	173196759	-	57
1	174725566	174725621	+	55
1	174861120	174861178	+	58
1	175714385	175714452	+	67
1	177084718	177084792	-	74
1	177084721	177084789	-	68
1	177614195	177614258	+	63
1	177614717	177614778	+	61
1	177641843	177641904	-	61
1	178195137	178195199	+	62
1	182344419	182344480	+	61
1	182344550	182344611	+	61
1	183180599	183180669	-	70
1	183180601	183180671	-	70
1	183180603	183180667	+	64
1	183180604	183180668	-	64
1	183184941	183185011	+	70
1	183442223	183442287	+	64
1	184272404	184272462	+	58
1	185506702	185506763	+	61
1	187583640	187583700	+	60
1	187698954	187699017	+	63
1	187835590	187835665	-	75
1	187974495	187974563	-	68
1	187974497	187974559	+	62
1	188619228	188619293	+	65
1	188846817	188846884	+	67
1	188846819	188846884	+	65
1	188846967	188847033	+	66
1	190120964	190121019	+	55
1	190298689	190298763	-	74
1	190476816	190476881	+	65
1	190895337	190895404	-	67
1	190971152	190971229	-	77
1	190971155	190971222	-	67
1	190971155	190971226	-	71
1	190971979	190972042	+	63
1	191004557	191004625	+	68
1	191584482	191584548	+	66
1	191662346	191662411	+	65
1	191689912	191689974	+	62
1	192755947	192756014	-	67
1	192755949	192756016	-	67
1	192755951	192756018	-	67
1	193196400	193196467	+	67
1	193346540	193346616	-	76
1	194162895	194162954	+	59
1	194554893	194554957	-	64
1	196555755	196555822	+	67
1	196555758	196555820	+	62
1	199109671	199109730	-	59
1	199166351	199166417	+	66
1	199166353	199166415	+	62
1	200222762	200222821	-	59
1	200457294	200457357	-	63
1	202536114	202536174	+	60
1	203136132	203136189	+	57
1	203178556	203178628	-	72
1	203178558	203178626	-	68
1	203178560	203178624	-	64
1	203178560	203178628	-	68
1	203287742	203287813	+	71
1	203342980	203343041	+	61
1	204807043	204807110	+	67
1	204807045	204807108	+	63
1	205835147	205835213	-	66
1	208802617	208802676	-	59
1	209214602	209214661	+	59
1	211273331	211273409	+	78
1	211273335	211273403	+	68
1	211273337	211273403	+	66
1	212527121	212527187	-	66
1	213857704	213857770	+	66
1	214433269	214433344	+	75
1	214433269	214433344	-	75
1	214433271	214433346	-	75
1	214984099	214984171	-	72
1	214984106	214984168	-	62
1	216802222	216802287	+	65
1	217140567	217140624	-	57
1	217754999	217755061	-	62
1	218122420	218122479	-	59
1	219541812	219541871	+	59
1	220297372	220297444	+	72
1	220530491	220530550	+	59
1	224790548	224790614	-	66
1	224828556	224828616	-	60
1	225590345	225590400	-	55
1	225594385	225594438	-	53
1	225594388	225594447	-	59
1	225594392	225594451	-	59
1	225594558	225594630	+	72
1	225594561	225594627	+	66
1	225594563	225594623	-	60
1	225594565	225594625	-	60
1	226994438	226994499	+	61
1	227076290	227076351	-	61
1	227317147	227317222	-	75
1	228235098	228235159	+	61
1	228272654	228272717	-	63
1	229931233	229931293	+	60
1	230202271	230202332	-	61
1	230339165	230339223	+	58
1	231019776	231019841	+	65
1	231597077	231597149	+	72
1	234433363	234433422	-	59
1	235934873	235934942	+	69
1	237610859	237610924	+	65
1	237610862	237610921	-	59
1	238248722	238248783	+	61
1	240563142	240563205	-	63
1	241748033	241748094	+	61
1	242274253	242274320	+	67
1	242406078	242406145	-	67
1	242406080	242406147	-	67
1	242876043	242876102	-	59
1	243997243	243997312	+	69
1	244521201	244521259	+	58
1	245536575	245536645	+	70
1	245536581	245536641	-	60
1	245993440	245993502	+	62
1	246148281	246148341	-	60
1	246787209	246787278	-	69
1	246861654	246861725	-	71
1	246861659	246861716	-	57
1	246867160	246867229	-	69
1	247266152	247266215	+	63
1	247695261	247695328	-	67
1	247695263	247695330	-	67
1	248517654	248517723	+	69
1	248562144	248562215	-	71
1	248794664	248794729	+	65
1	248794668	248794731	-	63
1	249633587	249633647	+	60
1	249664103	249664170	-	67
1	249721522	249721588	+	66
1	251180038	251180098	-	60
1	251529121	251529180	+	59
1	253915226	253915283	-	57
1	254673855	254673915	+	60
1	255461038	255461098	-	60
1	259235790	259235847	+	57
1	260240484	260240560	+	76
1	260240488	260240554	+	66
1	260240489	260240557	-	68
1	260240490	260240554	+	64
1	260240490	260240556	-	66
1	261044679	261044748	+	69
1	261270661	261270731	-	70
1	262026120	262026191	+	71
1	262721081	262721149	-	68
1	262721083	262721151	-	68
1	263430176	263430248	-	72
1	263430176	263430250	+	74
1	263430182	263430242	-	60
1	264426825	264426880	-	55
1	264426865	264426927	-	62
1	264588874	264588936	-	62
1	264917053	264917126	+	73
1	264917059	264917120	+	61
1	265703687	265703762	+	75
1	266006296	266006360	+	64
1	266825757	266825824	+	67
1	266825758	266825825	+	67
1	266825761	266825822	+	61
1	267057639	267057711	-	72
1	267057640	267057714	-	74
1	267057641	267057713	-	72
1	267057643	267057715	-	72
1	267176491	267176565	+	74
1	267176493	267176565	+	72
1	267378165	267378237	-	72
1	267378166	267378240	-	74
1	267378167	267378239	-	72
1	267378169	267378241	-	72
1	267594572	267594630	-	58
1	267595589	267595648	-	59
1	267848155	267848222	-	67
1	270266612	270266675	+	63
1	270488182	270488248	-	66
1	270536155	270536207	-	52
1	270536219	270536281	-	62
1	271695700	271695761	-	61
1	271695781	271695842	-	61
1	271942761	271942829	+	68
1	272180630	272180685	-	55
1	272497273	272497332	+	59
1	272506771	272506830	-	59
1	272509883	272509951	-	68
1	272509886	272509950	+	64
1	272509889	272509945	-	56
1	272509891	272509947	-	56
1	273425952	273426030	-	78
1	273425971	273426031	-	60
1	273426164	273426233	+	69
1	273426164	273426235	+	71
1	273426169	273426234	-	65
1	273587358	273587426	-	68
1	273794858	273794919	+	61
1	274143573	274143630	-	57
1	274873618	274873688	+	70
1	277616734	277616796	+	62
1	281767780	281767850	-	70
1	281786273	281786339	+	66
1	281786273	281786341	+	68
1	281786279	281786349	-	70
1	282328075	282328150	+	75
1	283690264	283690337	-	73
1	283690274	283690331	-	57
1	283871940	283872004	-	64
1	284475137	284475201	+	64
1	284499476	284499551	-	75
1	284499481	284499550	-	69
1	284977794	284977864	-	70
1	284977800	284977858	-	58
1	286549739	286549813	+	74
1	286549742	286549808	+	66
1	286549742	286549810	+	68
1	287606164	287606239	-	75
1	287606170	287606233	-	63
1	288601721	288601793	+	72
1	290036466	290036534	-	68
1	290903927	290903998	+	71
1	290962835	290962895	-	60
1	291854560	291854632	+	72
1	291854562	291854630	+	68
1	294420449	294420512	+	63
1	295117440	295117506	+	66
1	295149827	295149893	-	66
1	295149831	295149893	-	62
1	295161029	295161091	-	62
1	295197603	295197669	+	66
1	295234372	295234434	-	62
10	47302	47371	+	69
10	845040	845104	-	64
10	861661	861725	+	64
10	1214017	1214068	+	51
10	1221091	1221150	+	59
10	1347056	1347119	+	63
10	1419279	1419340	+	61
10	1461106	1461164	+	58
10	1467273	1467330	+	57
10	1468095	1468149	+	54
10	1806037	1806101	+	64
10	2602805	2602869	+	64
10	2647695	2647756	+	61
10	2913455	2913523	-	68
10	2913460	2913518	-	58
10	2913462	2913520	-	58
10	2913607	2913673	+	66
10	4096742	4096808	+	66
10	5219934	5220002	+	68
10	6043319	6043380	+	61
10	6791069	6791134	+	65
10	6999612	6999681	-	69
10	7083118	7083176	+	58
10	7357559	7357624	+	65
10	8203263	8203322	+	59
10	8728740	8728802	+	62
10	10729843	10729908	-	65
10	10885271	10885336	-	65
10	10978577	10978646	+	69
10	10978577	10978648	-	71
10	10978580	10978645	+	65
10	10978582	10978647	-	65
10	11890947	11891006	-	59
10	12121312	12121377	-	65
10	12937556	12937615	-	59
10	13542437	13542512	-	75
10	13542440	13542509	-	69
10	13767986	13768054	+	68
10	13767987	13768051	-	64
10	13875891	13875962	-	71
10	13875894	13875967	-	73
10	13875897	13875964	-	67
10	13875899	13875962	+	63
10	13875899	13875966	-	67
10	13889074	13889146	+	72
10	14028189	14028255	-	66
10	14201584	14201656	-	72
10	14201587	14201653	-	66
10	14201589	14201655	-	66
10	14492058	14492130	+	72
10	14492061	14492127	+	66
10	15369400	15369464	+	64
10	17354089	17354158	-	69
10	17354091	17354160	-	69
10	18378719	18378785	+	66
10	18701820	18701894	+	74
10	18701827	18701885	+	58
10	18701827	18701887	+	60
10	20393837	20393904	-	67
10	21315288	21315357	+	69
10	21315290	21315355	+	65
10	22092437	22092504	-	67
10	24916253	24916315	-	62
10	24973444	24973518	-	74
10	24973446	24973520	-	74
10	25576517	25576577	+	60
10	26181370	26181430	-	60
10	26283734	26283792	-	58
10	27172637	27172702	-	65
10	27172638	27172701	+	63
10	27172640	27172703	-	63
10	27279214	27279290	-	76
10	27279219	27279281	-	62
10	27279221	27279281	-	60
10	27279224	27279282	-	58
10	27574776	27574844	-	68
10	27574778	27574846	-	68
10	27574782	27574844	+	62
10	27714043	27714103	-	60
10	30042894	30042967	-	73
10	31079710	31079769	-	59
10	31082990	31083052	+	62
10	31216812	31216882	+	70
10	31341689	31341753	+	64
10	31717857	31717919	+	62
10	31717988	31718059	+	71
10	31868436	31868503	-	67
10	31868439	31868500	-	61
10	31868441	31868502	-	61
10	32424164	32424229	+	65
10	32558433	32558505	+	72
10	32896141	32896213	+	72
10	33320573	33320635	+	62
10	34048188	34048252	+	64
10	35545183	35545246	+	63
10	35547123	35547191	+	68
10	36995025	36995103	-	78
10	36995032	36995100	-	68
10	36995035	36995097	-	62
10	37167725	37167787	+	62
10	37320521	37320587	+	66
10	37492762	37492837	-	75
10	37492768	37492831	-	63
10	37492770	37492833	-	63
10	37492771	37492828	+	57
10	38222594	38222658	-	64
10	39161068	39161147	-	79
10	39161074	39161145	-	71
10	39161076	39161147	-	71
10	40090969	40091045	+	76
10	40090974	40091038	-	64
10	40090975	40091039	+	64
10	40090976	40091040	-	64
10	41506258	41506315	-	57
10	41776740	41776803	-	63
10	42603036	42603102	-	66
10	42603038	42603104	-	66
10	42805573	42805632	+	59
10	43236008	43236073	-	65
10	43236008	43236075	+	67
10	43236010	43236075	-	65
10	43452552	43452613	-	61
10	43597883	43597934	-	51
10	44204669	44204728	-	59
10	44538817	44538893	-	76
10	44858632	44858691	-	59
10	44916186	44916250	-	64
10	44916188	44916252	-	64
10	45137908	45137975	+	67
10	45276200	45276264	-	64
10	45276202	45276266	-	64
10	46245081	46245139	+	58
10	47741933	47741998	-	65
10	47795342	47795412	-	70
10	47795344	47795414	-	70
10	48371494	48371567	-	73
10	48371497	48371557	-	60
10	48371500	48371558	-	58
10	48402305	48402376	+	71
10	48402305	48402376	-	71
10	48402307	48402378	-	71
10	48402310	48402375	-	65
10	48417118	48417189	+	71
10	48417118	48417191	+	73
10	48417122	48417185	+	63
10	48417124	48417185	+	61
10	50768048	50768111	+	63
10	51008438	51008493	-	55
10	51070330	51070393	-	63
10	51282424	51282486	+	62
10	51282425	51282487	-	62
10	52378186	52378255	-	69
10	52378188	52378257	-	69
10	52479203	52479265	+	62
10	52754309	52754375	-	66
10	52754310	52754374	-	64
10	52754312	52754376	-	64
10	53136568	53136645	-	77
10	53136574	53136643	+	69
10	53136576	53136637	-	61
10	53136576	53136639	+	63
10	53136577	53136640	-	63
10	53136578	53136639	+	61
10	53743465	53743533	-	68
10	58343931	58343986	-	55
10	58527780	58527855	+	75
10	58527785	58527850	+	65
10	59421722	59421788	+	66
10	60387574	60387636	-	62
10	60387576	60387638	-	62
10	61062253	61062323	-	70
10	61226575	61226645	-	70
10	61765139	61765213	-	74
10	61765141	61765215	-	74
10	61765146	61765206	-	60
10	61765146	61765210	-	64
10	62946855	62946919	+	64
10	63649864	63649925	-	61
10	64926444	64926498	+	54
10	65021717	65021784	+	67
10	65142405	65142474	+	69
11	1296032	1296108	+	76
11	1296039	1296111	-	72
11	1296041	1296113	-	72
11	1563419	1563495	-	76
11	1563428	1563500	+	72
11	3776451	3776512	-	61
11	3989560	3989617	-	57
11	8284315	8284384	+	69
11	8739422	8739489	-	67
11	9634562	9634633	+	71
11	9634564	9634631	+	67
11	9844678	9844747	+	69
11	9844681	9844744	+	63
11	9844681	9844744	-	63
11	10552862	10552920	-	58
11	10737593	10737656	-	63
11	11522231	11522288	+	57
11	14062885	14062952	+	67
11	14073322	14073397	+	75
11	15222415	15222487	-	72
11	15371078	15371148	+	70
11	15485581	15485655	-	74
11	15568245	15568319	-	74
11	16490427	16490499	+	72
11	17059130	17059185	-	55
11	17199354	17199409	-	55
11	17567592	17567664	-	72
11	17567592	17567666	+	74
11	17567594	17567666	-	72
11	17567598	17567660	+	62
11	18199988	18200056	-	68
11	18199990	18200058	-	68
11	18349401	18349470	+	69
11	18349404	18349467	+	63
11	18533925	18533987	-	62
11	18993261	18993318	-	57
11	19023508	19023571	+	63
11	19040850	19040916	+	66
11	20030722	20030778	-	56
11	20232985	20233057	+	72
11	20232988	20233055	+	67
11	20232991	20233052	-	61
11	20656838	20656912	-	74
11	20656842	20656910	+	68
11	20656847	20656905	+	58
11	24662826	24662893	+	67
11	26638347	26638425	-	78
11	26901126	26901192	-	66
11	27165811	27165871	+	60
11	28334111	28334175	+	64
11	29406836	29406893	-	57
11	29591294	29591356	-	62
11	31094300	31094365	+	65
11	35013294	35013365	-	71
11	36362582	36362646	-	64
11	39393302	39393382	+	80
11	39393307	39393375	-	68
11	39393309	39393377	-	68
11	39393310	39393372	-	62
11	39393311	39393373	+	62
11	41889668	41889730	+	62
11	43303344	43303416	-	72
11	43303352	43303412	-	60
11	43903246	43903320	-	74
11	43903252	43903316	+	64
11	43903253	43903317	-	64
11	43985479	43985553	-	74
11	43985485	43985549	+	64
11	43985486	43985550	-	64
11	44147843	44147910	-	67
11	44147845	44147908	-	63
11	44147846	44147907	+	61
11	44147846	44147907	-	61
11	44975923	44975990	-	67
11	46436261	46436329	+	68
11	47835828	47835898	-	70
11	47912941	47912999	-	58
11	48033325	48033384	-	59
11	48033329	48033388	-	59
11	48896788	48896863	-	75
11	48896793	48896854	-	61
11	48896793	48896858	+	65
11	48896794	48896857	-	63
11	49184531	49184591	+	60
11	49786976	49787049	-	73
11	49786985	49787044	-	59
11	49786987	49787046	-	59
11	49889693	49889753	+	60
11	51838892	51838953	+	61
11	52230268	52230332	-	64
11	52230269	52230333	+	64
11	52230270	52230334	-	64
11	53963574	53963626	-	52
11	54020439	54020491	-	52
11	54087473	54087538	+	65
11	54182254	54182319	+	65
11	56178782	56178844	-	62
11	56298609	56298671	+	62
11	57181655	57181730	-	75
11	57957121	57957190	-	69
11	57957122	57957197	-	75
11	59278552	59278618	+	66
11	63132174	63132228	-	54
11	64665507	64665574	-	67
11	64932817	64932880	-	63
11	64932817	64932881	+	64
11	64932821	64932877	+	56
11	65851521	65851579	-	58
11	65922450	65922514	+	64
11	66010515	66010582	+	67
11	66560615	66560673	-	58
11	66560616	66560672	-	56
11	68350982	68351039	-	57
11	69101503	69101563	-	60
11	69434983	69435062	+	79
11	69434985	69435062	+	77
11	69434990	69435057	+	67
11	69688070	69688140	+	70
11	72230471	72230538	-	67
11	72464670	72464734	-	64
11	74709964	74710026	+	62
11	76358450	76358511	-	61
11	76502748	76502809	-	61
11	76502750	76502811	-	61
11	77595699	77595763	-	64
11	78928336	78928397	+	61
11	79375634	79375705	-	71
11	79416463	79416529	+	66
12	935362	935425	-	63
12	935364	935427	-	63
12	3597079	3597140	-	61
12	3724185	3724245	+	60
12	3730938	3731005	+	67
12	3736711	3736780	+	69
12	3736712	3736775	-	63
12	3736713	3736778	-	65
12	3736718	3736772	-	54
12	3816957	3817017	+	60
12	3873944	3874009	-	65
12	4198960	4199027	+	67
12	4198963	4199024	+	61
12	4391907	4391968	-	61
12	4391909	4391970	-	61
12	5155787	5155855	-	68
12	5155791	5155859	-	68
12	5155792	5155858	-	66
12	5155794	5155860	+	66
12	5155798	5155859	+	61
12	5243142	5243207	+	65
12	6255298	6255356	+	58
12	6335312	6335370	+	58
12	8307049	8307129	+	80
12	11570742	11570810	-	68
12	11570744	11570812	-	68
12	12049603	12049677	-	74
12	12049606	12049674	-	68
12	12049609	12049675	-	66
12	12069403	12069470	-	67
12	12153887	12153957	+	70
12	12153891	12153953	+	62
12	12461220	12461279	+	59
12	12692675	12692735	-	60
12	12891676	12891736	+	60
12	12927873	12927940	+	67
12	13003471	13003539	+	68
12	13003474	13003534	+	60
12	13003474	13003536	+	62
12	13783559	13783617	-	58
12	14163153	14163223	-	70
12	14483713	14483789	-	76
12	14581905	14581971	+	66
12	14581906	14581972	+	66
12	14628586	14628652	+	66
12	14628587	14628653	+	66
12	15111522	15111582	+	60
12	15197764	15197841	-	77
12	15197766	15197843	-	77
12	15197768	15197845	+	77
12	15197768	15197845	-	77
12	15197775	15197838	-	63
12	15254008	15254069	-	61
12	15254010	15254071	-	61
12	15295028	15295088	+	60
12	16269687	16269763	+	76
12	16682079	16682151	+	72
12	16682081	16682151	+	70
12	16888133	16888210	+	77
12	16888138	16888205	-	67
12	16888140	16888203	-	63
12	16888141	16888202	-	61
12	17054263	17054327	+	64
12	17392483	17392562	+	79
12	17392487	17392557	+	70
12	17787134	17787206	+	72
12	17787138	17787200	+	62
12	17787139	17787201	+	62
12	17788092	17788163	+	71
12	18444631	18444702	+	71
12	18444631	18444704	+	73
12	19370808	19370865	+	57
12	19382241	19382308	-	67
12	19382244	19382306	-	62
12	19382246	19382308	-	62
12	21369595	21369655	-	60
12	21369599	21369659	-	60
12	21412468	21412538	+	70
12	23210193	23210266	-	73
12	23210196	23210263	-	67
12	23210197	23210266	-	69
12	23210199	23210268	-	69
12	24235465	24235535	-	70
12	24290826	24290887	+	61
12	24482490	24482563	+	73
12	24482496	24482557	+	61
12	25001834	25001897	-	63
12	25001836	25001895	+	59
12	25115215	25115274	+	59
12	28023161	28023226	-	65
12	28525035	28525098	-	63
12	28552522	28552586	-	64
12	28606080	28606153	+	73
12	28606081	28606156	-	75
12	28606083	28606150	+	67
12	29803947	29804011	+	64
12	31783428	31783492	-	64
12	31783430	31783490	-	60
12	31783432	31783492	-	60
12	31888408	31888468	+	60
12	31888409	31888467	+	58
12	32003714	32003789	+	75
12	32190628	32190692	+	64
12	32190631	32190691	+	60
12	32250300	32250370	+	70
12	32287446	32287516	-	70
12	33051542	33051610	-	68
12	33433156	33433229	-	73
12	33457342	33457406	-	64
12	34126009	34126080	+	71
12	34126012	34126077	+	65
12	34126013	34126084	-	71
12	34130703	34130772	+	69
12	34130709	34130764	+	55
12	34494218	34494280	-	62
12	34544867	34544940	+	73
12	34544868	34544935	-	67
12	34544870	34544937	-	67
12	34544873	34544934	-	61
12	34559595	34559672	+	77
12	34559604	34559665	-	61
12	34559606	34559667	-	61
12	34656588	34656665	-	77
12	34656597	34656658	+	61
12	34668880	34668953	+	73
12	34668881	34668948	-	67
12	34668883	34668950	-	67
12	34668886	34668947	-	61
12	34680502	34680564	-	62
12	35219855	35219917	+	62
12	35635195	35635259	-	64
12	35635197	35635261	-	64
12	35695739	35695808	-	69
12	35695742	35695805	-	63
12	35732812	35732879	-	67
12	35869920	35869982	-	62
12	36243590	36243658	+	68
12	36243591	36243657	+	66
12	36243591	36243657	-	66
12	36243592	36243658	+	66
12	37007596	37007660	+	64
12	37115814	37115872	-	58
12	37115820	37115878	-	58
12	37118359	37118424	-	65
12	37137589	37137649	+	60
12	37792775	37792835	+	60
12	38156094	38156153	+	59
12	38319735	38319807	+	72
12	38319738	38319804	+	66
12	39035625	39035697	-	72
12	39035627	39035699	-	72
12	39515967	39516031	-	64
12	41558359	41558414	+	55
12	42849094	42849163	-	69
12	43045998	43046057	+	59
12	43395598	43395662	+	64
12	43502580	43502652	+	72
12	43832729	43832793	-	64
12	43919886	43919954	-	68
12	44046262	44046326	+	64
12	44225124	44225193	-	69
12	44225133	44225187	-	54
12	44225139	44225193	-	54
12	44225141	44225195	-	54
12	46039253	46039328	+	75
12	46039254	46039329	+	75
12	46039258	46039321	-	63
12	46039260	46039321	+	61
12	46039260	46039323	+	63
12	46039260	46039323	-	63
12	46088357	46088414	-	57
12	46312432	46312496	+	64
12	46312434	46312494	+	60
12	48845330	48845394	+	64
12	48977768	48977832	+	64
12	49070831	49070907	-	76
12	49283727	49283788	+	61
12	50190954	50191023	+	69
12	50252596	50252675	+	79
12	50252607	50252662	+	55
12	50472762	50472831	-	69
12	50875248	50875307	+	59
12	50934352	50934423	+	71
12	50934358	50934417	+	59
12	51048254	51048325	+	71
12	51757552	51757626	+	74
12	51757557	51757621	+	64
12	51786722	51786783	+	61
12	51786723	51786786	-	63
12	52210388	52210449	+	61
12	52294307	52294364	-	57
12	52294311	52294368	-	57
12	53341604	53341664	+	60
13	10626	10693	-	67
13	161187	161254	-	67
13	589650	589725	+	75
13	642976	643030	-	54
13	1994137	1994192	+	55
13	2594763	2594839	+	76
13	2594769	2594833	+	64
13	3113678	3113742	+	64
13	3718954	3719020	-	66
13	3718957	3719023	+	66
13	3718958	3719024	-	66
13	3718961	3719019	+	58
13	4470494	4470557	+	63
13	5574230	5574291	+	61
13	5805208	5805264	+	56
13	6046061	6046121	-	60
13	6046062	6046130	+	68
13	6108531	6108588	+	57
13	6986698	6986758	-	60
13	7324517	7324580	-	63
13	8322305	8322376	-	71
13	9202573	9202638	+	65
13	9202573	9202638	-	65
13	9202576	9202638	+	62
13	9416325	9416379	+	54
13	9440626	9440694	-	68
13	9846154	9846217	-	63
13	14786451	14786509	+	58
13	14909803	14909869	-	66
13	15481192	15481254	-	62
13	15819448	15819523	+	75
13	15902954	15903012	+	58
13	16138354	16138418	+	64
13	17300432	17300496	+	64
13	18515946	18516015	+	69
13	21277751	21277812	-	61
13	21447221	21447293	-	72
13	23642837	23642909	+	72
13	23642838	23642910	-	72
13	23642844	23642902	+	58
13	23688038	23688100	-	62
13	23726565	23726637	+	72
13	23726566	23726638	-	72
13	23726572	23726630	+	58
13	25208156	25208213	+	57
13	26113075	26113143	-	68
13	26113076	26113138	-	62
13	26654312	26654377	-	65
13	27231795	27231851	+	56
13	27462527	27462591	-	64
13	30323175	30323240	-	65
13	30323176	30323239	+	63
13	31024272	31024336	-	64
13	31024273	31024335	-	62
13	31268933	31268997	+	64
13	31999783	31999843	-	60
13	32269712	32269782	-	70
13	32714106	32714163	-	57
13	34485973	34486045	+	72
13	34485974	34486046	-	72
13	34485984	34486040	-	56
13	34550082	34550158	-	76
13	34550088	34550154	+	66
13	35523663	35523723	-	60
13	36428264	36428324	-	60
13	36587515	36587573	-	58
13	36922810	36922873	-	63
13	37359964	37360025	-	61
13	37790959	37791018	-	59
13	38328318	38328389	+	71
13	38461370	38461433	+	63
13	38492736	38492795	-	59
13	39232712	39232779	-	67
13	40037950	40038026	-	76
13	40456713	40456783	+	70
13	40683548	40683610	+	62
13	40737361	40737415	-	54
13	41149148	41149211	+	63
13	44177096	44177167	+	71
13	44177099	44177164	-	65
13	44656764	44656832	+	68
13	45543771	45543822	-	51
13	47740875	47740937	-	62
13	50050148	50050216	+	68
13	50404059	50404120	+	61
13	50968255	50968315	-	60
13	51465007	51465070	+	63
13	51848272	51848329	+	57
13	54719949	54720010	+	61
13	55328843	55328899	+	56
13	55432276	55432351	-	75
13	55432279	55432349	-	70
13	55432281	55432347	-	66
13	55432282	55432350	-	68
13	55801045	55801104	+	59
13	55905076	55905137	-	61
13	56424678	56424748	+	70
13	56554564	56554631	-	67
13	57347466	57347539	+	73
13	58209660	58209713	+	53
13	58222921	58222997	-	76
13	58222928	58222992	+	64
13	60423429	60423503	+	74
13	60423429	60423503	-	74
13	60423431	60423501	-	70
13	60423432	60423502	+	70
13	60423437	60423499	-	62
13	61029714	61029777	+	63
13	61258720	61258780	+	60
13	61528369	61528450	-	81
13	62524780	62524857	-	77
13	62875722	62875792	+	70
13	62875726	62875788	+	62
13	62875726	62875790	-	64
13	63848775	63848846	-	71
13	64927737	64927797	+	60
13	65037334	65037397	+	63
13	65710806	65710868	-	62
13	67397306	67397376	+	70
13	67397309	67397373	+	64
13	67402518	67402586	-	68
13	67402518	67402588	+	70
13	67402519	67402585	+	66
13	67402519	67402585	-	66
13	67402520	67402582	-	62
13	67402522	67402584	-	62
13	67402523	67402585	+	62
13	67688622	67688694	-	72
13	67688624	67688691	-	67
13	67688624	67688696	-	72
13	67688627	67688692	+	65
13	67688630	67688689	-	59
13	67858692	67858752	+	60
13	67858692	67858754	+	62
13	67880150	67880207	-	57
13	67897811	67897866	-	55
13	68547660	68547726	+	66
13	68548541	68548599	+	58
13	68710868	68710942	-	74
13	69700174	69700230	+	56
13	69888477	69888542	-	65
13	70620983	70621055	-	72
13	70620984	70621056	+	72
13	70620989	70621051	+	62
13	73053870	73053929	+	59
13	73054198	73054258	+	60
13	73227669	73227748	+	79
13	73227669	73227748	-	79
13	73227672	73227745	-	73
13	73227675	73227738	-	63
13	73227677	73227740	+	63
13	73227681	73227736	-	55
13	73622300	73622363	-	63
13	73713407	73713482	+	75
13	73713412	73713477	+	65
13	74955887	74955945	+	58
13	75404924	75404990	-	66
13	75498982	75499046	-	64
13	79847830	79847885	+	55
13	79855715	79855778	-	63
13	81688775	81688846	+	71
13	83298645	83298701	+	56
13	83298913	83298976	+	63
13	83298914	83298979	-	65
13	85322135	85322199	+	64
13	85697061	85697122	+	61
13	86059764	86059836	+	72
13	86059768	86059830	+	62
13	86059773	86059827	+	54
13	86906440	86906511	+	71
13	86906440	86906511	-	71
13	86906444	86906503	-	59
13	86906444	86906507	+	63
13	86906445	86906506	-	61
13	86994650	86994719	-	69
13	87414738	87414795	+	57
13	89530240	89530311	+	71
13	89530245	89530306	+	61
13	89874286	89874344	+	58
13	92689118	92689192	-	74
13	92689125	92689193	-	68
13	92941577	92941647	+	70
13	95370400	95370461	+	61
13	96038342	96038409	+	67
13	97357914	97357971	+	57
13	97478524	97478581	-	57
13	97818393	97818455	+	62
13	98792875	98792943	-	68
13	98792877	98792945	-	68
13	98792878	98792940	-	62
13	98792883	98792943	-	60
13	99616385	99616446	-	61
13	100213986	100214060	-	74
13	100213991	100214055	-	64
13	100213993	100214053	-	60
13	100213995	100214055	-	60
13	100293028	100293102	-	74
13	100293033	100293097	-	64
13	100293034	100293096	-	62
13	100293036	100293098	-	62
13	100800199	100800264	+	65
13	101055229	101055287	-	58
13	101361177	101361247	+	70
13	101923380	101923453	+	73
13	101923383	101923450	-	67
13	101923385	101923448	-	63
13	101923386	101923447	+	61
13	101923389	101923448	-	59
13	102416182	102416242	+	60
13	103052162	103052220	+	58
13	103862255	103862317	-	62
13	104082811	104082865	-	54
13	104083430	104083490	+	60
13	104483058	104483116	-	58
13	104483151	104483208	-	57
13	104798802	104798869	-	67
13	105067207	105067277	+	70
13	105067214	105067272	-	58
13	106478123	106478201	-	78
13	106478127	106478199	+	72
13	106478130	106478194	+	64
13	106478130	106478194	-	64
13	106478130	106478196	+	66
13	107252027	107252094	+	67
13	107315029	107315102	-	73
13	107315031	107315100	-	69
13	107411273	107411332	-	59
13	107411275	107411330	+	55
13	109022946	109023007	-	61
13	109032499	109032567	+	68
13	109032500	109032568	-	68
13	109090104	109090176	-	72
13	109090106	109090178	-	72
13	110926088	110926161	-	73
13	111117395	111117451	+	56
13	112835431	112835499	-	68
13	112835433	112835497	-	64
13	112835436	112835502	-	66
13	114202630	114202695	+	65
13	114404551	114404618	+	67
13	115571015	115571084	-	69
13	115686552	115686624	-	72
13	115714383	115714444	+	61
13	116503625	116503684	+	59
13	116731316	116731380	-	64
13	117039889	117039953	-	64
13	117113655	117113713	+	58
13	117550396	117550458	+	62
13	117783693	117783747	-	54
13	119288051	119288116	+	65
13	119580532	119580596	-	64
13	119802265	119802320	-	55
13	119803135	119803201	+	66
13	121414941	121415013	+	72
13	121414941	121415015	+	74
13	121414942	121415016	-	74
13	121422750	121422826	-	76
13	121422756	121422817	+	61
13	121422758	121422817	+	59
13	121422758	121422817	-	59
13	121544426	121544485	+	59
13	122331326	122331385	-	59
13	122434787	122434850	+	63
13	123166525	123166590	-	65
13	124050350	124050416	+	66
13	124349046	124349112	+	66
13	124349726	124349790	-	64
13	124857196	124857261	-	65
13	127300272	127300337	+	65
13	127550755	127550821	+	66
13	129339915	129339975	-	60
13	129499689	129499753	+	64
13	130457726	130457785	+	59
13	131022251	131022324	-	73
13	131022252	131022323	-	71
13	131041066	131041137	+	71
13	131041066	131041139	+	73
13	132746596	132746659	+	63
13	134252987	134253043	+	56
13	135130202	135130263	+	61
13	135975815	135975881	+	66
13	137994457	137994517	+	60
13	138249778	138249843	-	65
13	138249780	138249845	-	65
13	138885481	138885553	+	72
13	138885485	138885547	+	62
13	138885486	138885548	+	62
13	140095149	140095222	+	73
13	140095154	140095217	+	63
13	140239696	140239752	-	56
13	140944462	140944533	+	71
13	140944469	140944526	+	57
13	141063083	141063142	+	59
13	142208507	142208576	+	69
13	143253033	143253092	+	59
13	144229091	144229155	+	64
13	145000878	145000938	-	60
14	198373	198435	-	62
14	293229	293291	-	62
14	440965	441037	-	72
14	440967	441036	+	69
14	1035753	1035824	-	71
14	1035754	1035821	+	67
14	1600726	1600795	+	69
14	1600726	1600795	-	69
14	2369883	2369949	-	66
14	3381182	3381244	+	62
14	3579272	3579334	+	62
14	3851705	3851768	-	63
14	3958726	3958804	+	78
14	3958731	3958799	+	68
14	4004333	4004408	+	75
14	4063336	4063395	-	59
14	4137709	4137773	-	64
14	5123907	5123982	-	75
14	5123910	5123979	+	69
14	5123913	5123976	-	63
14	5590438	5590495	+	57
14	6599943	6600008	+	65
14	6599946	6600005	-	59
14	6739801	6739870	-	69
14	7272197	7272268	-	71
14	7272197	7272272	+	75
14	7272199	7272270	-	71
14	7272201	7272272	-	71
14	7272202	7272267	+	65
14	7972468	7972531	+	63
14	9488333	9488404	-	71
14	9488335	9488406	-	71
14	9488341	9488400	-	59
14	9540817	9540889	-	72
14	9540824	9540883	-	59
14	9540826	9540885	-	59
14	9826588	9826647	+	59
14	10005395	10005472	-	77
14	10005398	10005469	-	71
14	10005401	10005466	+	65
14	10005401	10005466	-	65
14	10005403	10005468	-	65
14	10811932	10812002	-	70
14	10811936	10812006	-	70
14	11036731	11036802	+	71
14	11542637	11542693	-	56
14	11800394	11800462	-	68
14	11800396	11800464	-	68
14	11800400	11800460	-	60
14	11800401	11800459	-	58
14	12850917	12850986	+	69
14	12850917	12850988	+	71
14	12850920	12850985	+	65
14	14243422	14243479	-	57
14	14800855	14800920	+	65
14	14862515	14862574	+	59
14	15369641	15369702	-	61
14	15369642	15369701	-	59
14	17868073	17868144	-	71
14	18212053	18212120	+	67
14	18438020	18438088	-	68
14	18774401	18774461	-	60
14	19732081	19732145	+	64
14	19896837	19896901	+	64
14	20082091	20082160	-	69
14	20729343	20729406	-	63
14	20829550	20829621	-	71
14	21804679	21804751	-	72
14	21804681	21804753	-	72
14	22049279	22049352	+	73
14	22143370	22143435	+	65
14	22214924	22214991	+	67
14	22673716	22673777	+	61
14	23010497	23010563	+	66
14	23888219	23888291	+	72
14	23888227	23888283	+	56
14	24422255	24422324	-	69
14	24422257	24422326	-	69
14	24422259	24422328	-	69
14	24422263	24422320	+	57
14	25459722	25459799	+	77
14	25704856	25704915	+	59
14	27173819	27173887	-	68
14	27490838	27490895	+	57
14	27795222	27795292	+	70
14	29521306	29521382	+	76
14	29798073	29798131	+	58
14	30372207	30372275	-	68
14	30503150	30503213	+	63
14	30977136	30977207	-	71
14	30977137	30977206	-	69
14	30977137	30977210	+	73
14	30977143	30977204	+	61
14	30977143	30977204	-	61
14	31028880	31028954	-	74
14	31028882	31028952	-	70
14	31028887	31028947	-	60
14	31266626	31266695	-	69
14	31266632	31266691	+	59
14	31266632	31266693	+	61
14	31337680	31337743	-	63
14	31862371	31862431	-	60
14	32000032	32000100	+	68
14	32277671	32277744	+	73
14	32277671	32277746	+	75
14	32277679	32277738	+	59
14	32866526	32866594	-	68
14	32910229	32910299	+	70
14	34413997	34414071	+	74
14	34414000	34414068	+	68
14	35098322	35098381	-	59
14	35484152	35484223	-	71
14	35484155	35484220	+	65
14	35484158	35484217	-	59
14	35753233	35753295	+	62
14	38054179	38054247	+	68
14	38276456	38276515	+	59
14	38964297	38964370	-	73
14	38964301	38964366	-	65
14	40341837	40341909	-	72
14	40341839	40341907	+	68
14	40341839	40341909	+	70
14	40341842	40341904	-	62
14	40341843	40341907	-	64
14	42609037	42609091	+	54
14	44858448	44858513	-	65
14	44864855	44864933	+	78
14	44864865	44864923	+	58
14	46746978	46747036	-	58
14	46746984	46747042	-	58
14	47126755	47126827	+	72
14	47126756	47126828	-	72
14	47126762	47126822	-	60
14	48761593	48761651	-	58
14	49173021	49173094	+	73
14	49233126	49233192	-	66
14	49233128	49233194	-	66
14	50398413	50398487	+	74
14	50823024	50823089	+	65
14	51308887	51308955	-	68
14	51308888	51308962	-	74
14	51308889	51308957	-	68
14	51308890	51308952	+	62
14	51308892	51308952	+	60
14	51473985	51474046	-	61
14	51474040	51474099	-	59
14	52498023	52498083	+	60
14	52599069	52599129	-	60
14	54044051	54044117	+	66
14	54165302	54165368	+	66
14	54953930	54954005	-	75
14	55223821	55223898	-	77
14	55223827	55223896	-	69
14	55223831	55223892	-	61
14	55223833	55223894	-	61
14	55817148	55817218	+	70
14	56419839	56419912	+	73
14	57344406	57344466	-	60
14	57525773	57525831	-	58
14	57570203	57570264	+	61
14	58309772	58309832	+	60
14	58366461	58366513	-	52
14	58443564	58443624	+	60
14	58500054	58500106	-	52
14	58990953	58991025	+	72
14	58990956	58991022	+	66
14	59387077	59387136	+	59
14	59435670	59435729	-	59
14	59846725	59846788	-	63
14	59846729	59846792	+	63
14	60186733	60186807	-	74
14	60186733	60186811	-	78
14	60186736	60186808	-	72
14	60186737	60186809	+	72
14	61211137	61211207	-	70
14	61211139	61211209	-	70
14	61211140	61211210	+	70
14	61211144	61211204	-	60
14	61211145	61211205	+	60
14	61211146	61211206	-	60
14	61316271	61316341	-	70
14	61316272	61316342	+	70
14	61316276	61316336	-	60
14	61316277	61316337	+	60
14	61316278	61316338	-	60
14	61596531	61596596	+	65
14	61596531	61596598	+	67
14	61596534	61596595	+	61
14	61690864	61690920	+	56
14	61832252	61832319	+	67
14	61832258	61832313	+	55
14	62081641	62081708	-	67
14	62086259	62086327	+	68
14	62086265	62086320	+	55
14	63052265	63052339	-	74
14	63862030	63862086	+	56
14	64158778	64158829	+	51
14	64526906	64526964	-	58
14	65766916	65766985	-	69
14	65766918	65766983	-	65
14	65766924	65766981	-	57
14	65821654	65821725	+	71
14	65821655	65821722	+	67
14	65821660	65821719	+	59
14	66807471	66807545	-	74
14	66807477	66807539	-	62
14	66807479	66807541	-	62
14	66834909	66834983	+	74
14	67235289	67235349	-	60
14	67847633	67847703	+	70
14	68209012	68209081	-	69
14	68209026	68209095	-	69
14	68607945	68608012	+	67
14	71887759	71887817	+	58
14	71958331	71958389	-	58
14	71958333	71958391	-	58
14	73189093	73189161	+	68
14	73511161	73511225	-	64
14	74099115	74099184	+	69
14	74099115	74099184	-	69
14	74099118	74099181	-	63
14	74108455	74108526	-	71
14	74108456	74108527	+	71
14	74108459	74108526	+	67
14	74108461	74108528	-	67
14	74146596	74146668	-	72
14	74146597	74146669	+	72
14	74196068	74196141	-	73
14	74196070	74196143	-	73
14	74196076	74196137	+	61
14	74205845	74205923	-	78
14	74205851	74205921	-	70
14	74205853	74205915	-	62
14	74205855	74205917	-	62
14	74223641	74223709	-	68
14	74223642	74223710	+	68
14	74223644	74223706	-	62
14	74223646	74223708	-	62
14	74283236	74283305	+	69
14	74283236	74283305	-	69
14	74283239	74283302	-	63
14	74393912	74393990	-	78
14	74393916	74393986	-	70
14	74393920	74393982	-	62
14	74393922	74393984	-	62
14	74560876	74560947	-	71
14	74560882	74560953	-	71
14	74642364	74642424	-	60
14	74919333	74919389	-	56
14	74943107	74943163	+	56
14	75049653	75049709	-	56
14	75156987	75157053	+	66
14	76063109	76063173	+	64
14	76064945	76065017	-	72
14	76085907	76085963	-	56
14	76868747	76868817	-	70
14	76868748	76868820	+	72
14	76868748	76868822	+	74
14	76868753	76868817	+	64
14	76868754	76868814	-	60
14	76954386	76954449	+	63
14	78428615	78428678	-	63
14	79094806	79094873	+	67
14	80023946	80024016	+	70
14	80989543	80989614	+	71
14	81014636	81014699	+	63
14	81314163	81314234	+	71
14	82363574	82363635	+	61
14	83753676	83753735	-	59
14	84414337	84414405	-	68
14	84414339	84414407	-	68
14	84414341	84414409	-	68
14	85215649	85215720	+	71
14	85215649	85215722	+	73
14	87947933	87947994	-	61
14	88110562	88110624	-	62
14	88671906	88671965	-	59
14	88853182	88853255	+	73
14	88853188	88853249	+	61
14	88964154	88964227	+	73
14	88964160	88964221	+	61
14	89521579	89521647	+	68
14	90027827	90027885	-	58
14	90107528	90107585	-	57
14	92789301	92789371	+	70
14	92906393	92906463	+	70
14	92906394	92906464	-	70
14	92906398	92906458	+	60
14	92906399	92906459	-	60
14	93317503	93317562	+	59
14	93761280	93761340	-	60
14	93887690	93887762	-	72
14	93887691	93887761	+	70
14	93887691	93887761	-	70
14	93887693	93887759	-	66
14	93887694	93887760	+	66
14	93887695	93887761	-	66
14	94188227	94188305	-	78
14	94188229	94188307	-	78
14	94227402	94227478	-	76
14	94227409	94227471	-	62
14	94227409	94227475	-	66
14	94422507	94422579	-	72
14	94422511	94422575	-	64
14	94422512	94422574	-	62
14	94422514	94422576	-	62
14	96504654	96504725	-	71
14	96504656	96504727	-	71
14	96504661	96504718	+	57
14	97425242	97425320	-	78
14	97425243	97425319	-	76
14	97425248	97425320	+	72
14	97425253	97425315	+	62
14	97521311	97521373	+	62
14	98225320	98225385	-	65
14	98476088	98476146	+	58
14	99664078	99664143	+	65
14	99928815	99928881	-	66
14	100221902	100221959	-	57
14	100224198	100224268	+	70
14	100224204	100224268	-	64
14	104038026	104038090	-	64
14	104843415	104843475	-	60
14	105335495	105335555	-	60
14	106883504	106883558	-	54
14	107009334	107009388	+	54
14	108866459	108866515	+	56
14	108972543	108972603	+	60
14	109021678	109021754	+	76
14	109021688	109021750	-	62
14	109056879	109056949	+	70
14	109056880	109056950	-	70
14	109056885	109056943	+	58
14	109255169	109255232	-	63
14	109255171	109255234	-	63
14	110141203	110141268	-	65
14	110155778	110155849	-	71
14	110155781	110155846	-	65
14	110155783	110155848	-	65
14	110219096	110219158	-	62
14	110402480	110402543	-	63
14	110402482	110402545	-	63
14	111285307	111285368	-	61
14	112346220	112346296	-	76
14	112346226	112346296	+	70
14	112346228	112346292	-	64
14	112346230	112346294	-	64
14	112412120	112412186	-	66
14	113064148	113064209	-	61
14	115742056	115742128	+	72
14	115742060	115742122	+	62
14	115875432	115875498	-	66
14	115875433	115875497	-	64
14	115875433	115875499	+	66
14	115875434	115875500	-	66
14	115875435	115875495	+	60
14	116064495	116064567	+	72
14	116064500	116064562	+	62
14	116427791	116427853	-	62
14	117100414	117100485	-	71
14	117658500	117658557	-	57
14	117870616	117870673	-	57
14	118116479	118116552	-	73
14	118116484	118116545	-	61
14	118116486	118116547	-	61
14	118116489	118116552	+	63
14	118302621	118302685	+	64
14	118326581	118326649	-	68
14	118411980	118412048	+	68
14	118435945	118436009	-	64
14	118462278	118462337	-	59
14	118796329	118796401	-	72
14	119088306	119088379	-	73
14	119088310	119088375	-	65
14	119088314	119088379	-	65
14	119088315	119088380	+	65
14	119088316	119088381	-	65
14	119088317	119088380	+	63
14	119088318	119088383	-	65
14	119117579	119117646	-	67
14	119274042	119274101	+	59
14	119274067	119274132	-	65
14	119763337	119763407	+	70
14	119763340	119763404	+	64
14	123991503	123991561	-	58
14	124077579	124077655	-	76
14	124077588	124077654	-	66
14	125417228	125417292	-	64
14	125417229	125417289	+	60
14	125651454	125651520	+	66
14	125651459	125651517	+	58
14	126067933	126067996	+	63
14	126067936	126067993	-	57
14	126612664	126612733	-	69
14	126612666	126612731	-	65
14	126612668	126612733	-	65
14	126628966	126629026	-	60
14	126654193	126654260	+	67
14	127332398	127332457	+	59
14	127334429	127334487	+	58
14	128299207	128299269	-	62
14	129686813	129686875	-	62
14	130989952	130990013	-	61
14	133884270	133884336	-	66
14	136021706	136021772	+	66
14	136666005	136666074	-	69
14	136666007	136666076	-	69
14	137114360	137114425	+	65
14	137220705	137220767	-	62
14	137223140	137223207	-	67
14	137223142	137223206	+	64
14	137242944	137243010	+	66
14	139701701	139701761	+	60
14	140771454	140771515	+	61
14	141060032	141060104	+	72
14	141839457	141839534	+	77
14	141839457	141839534	-	77
14	141839463	141839528	+	65
14	141839463	141839528	-	65
14	141839464	141839525	+	61
14	141954061	141954129	+	68
14	142643407	142643464	-	57
14	145000556	145000630	+	74
14	145000559	145000627	+	68
14	145000561	145000627	-	66
15	2215718	2215786	-	68
15	2353355	2353415	-	60
15	2765248	2765308	+	60
15	2860723	2860782	+	59
15	2942759	2942819	-	60
15	2942765	2942825	-	60
15	3706939	3707001	+	62
15	3706940	3707004	-	64
15	3706942	3707000	+	58
15	3754550	3754612	-	62
15	5404211	5404284	-	73
15	5404212	5404287	-	75
15	6003082	6003148	-	66
15	7034156	7034219	+	63
15	7447965	7448028	+	63
15	7587874	7587939	+	65
15	8402472	8402541	-	69
15	8402474	8402543	-	69
15	8402476	8402545	-	69
15	9728356	9728416	-	60
15	9728621	9728682	-	61
15	11072444	11072501	+	57
15	11604183	11604255	+	72
15	11604189	11604251	-	62
15	12963727	12963795	+	68
15	13223982	13224051	-	69
15	13223998	13224063	-	65
15	14178030	14178094	+	64
15	14179501	14179567	+	66
15	14326287	14326343	+	56
15	14390446	14390503	-	57
15	14390463	14390525	-	62
15	14392519	14392575	-	56
15	14392527	14392583	-	56
15	14393477	14393541	-	64
15	14393479	14393543	-	64
15	14393600	14393674	+	74
15	14393601	14393671	+	70
15	14393606	14393670	-	64
15	14393607	14393667	+	60
15	14393608	14393672	-	64
15	14606356	14606416	-	60
15	14606473	14606538	+	65
15	15962938	15963000	-	62
15	16919625	16919687	+	62
15	17103721	17103783	-	62
15	17107992	17108056	-	64
15	17107993	17108053	+	60
15	18585548	18585607	-	59
15	18588893	18588949	-	56
15	19213885	19213950	+	65
15	19214495	19214554	+	59
15	22317987	22318047	+	60
15	23632330	23632396	+	66
15	23632331	23632393	+	62
15	23632333	23632393	+	60
15	23991728	23991797	+	69
15	23991732	23991793	+	61
15	24349835	24349892	-	57
15	24459766	24459824	-	58
15	24460604	24460659	-	55
15	24460912	24460967	-	55
15	25498535	25498609	-	74
15	25498536	25498608	-	72
15	25498537	25498609	+	72
15	25498541	25498605	+	64
15	25498542	25498606	-	64
15	25844659	25844731	-	72
15	25844663	25844729	+	66
15	25844664	25844730	-	66
15	26765051	26765115	-	64
15	28349916	28349979	-	63
15	28409994	28410048	+	54
15	28606753	28606812	+	59
15	29048827	29048900	-	73
15	29048829	29048898	-	69
15	29048832	29048899	-	67
15	30059307	30059371	-	64
15	30844004	30844067	+	63
15	32281818	32281884	-	66
15	34147002	34147064	-	62
15	37716543	37716614	+	71
15	38644322	38644392	+	70
15	38644325	38644389	+	64
15	38716312	38716371	+	59
15	39688711	39688781	+	70
15	39688717	39688777	-	60
15	39766722	39766797	-	75
15	40873460	40873518	+	58
15	41411387	41411447	-	60
15	41901253	41901324	-	71
15	41901255	41901322	-	67
15	41901258	41901323	+	65
15	41960397	41960458	+	61
15	45310453	45310513	+	60
15	45424235	45424297	-	62
15	45424235	45424308	+	73
15	45424240	45424302	+	62
15	45424241	45424303	-	62
15	45424243	45424305	-	62
15	45679740	45679807	-	67
15	45679741	45679810	+	69
15	45679746	45679809	-	63
15	45683397	45683469	+	72
15	45683398	45683466	-	68
15	45683401	45683463	+	62
15	45683401	45683463	-	62
15	45683403	45683463	+	60
15	45683403	45683465	-	62
15	45992399	45992475	-	76
15	47836374	47836449	+	75
15	49169424	49169495	-	71
15	49719577	49719640	-	63
15	49832746	49832806	+	60
15	50874504	50874567	-	63
15	51065848	51065903	+	55
15	51721459	51721522	-	63
15	51923939	51924002	+	63
15	53074252	53074312	-	60
15	53410691	53410756	+	65
15	53410691	53410756	-	65
15	53410693	53410758	-	65
15	54628437	54628495	-	58
15	54740693	54740750	+	57
15	54812194	54812249	+	55
15	54982630	54982685	+	55
15	55315349	55315410	-	61
15	56124411	56124485	+	74
15	56124416	56124480	+	64
15	57822792	57822861	-	69
15	57823777	57823831	-	54
15	58768573	58768631	-	58
15	59496139	59496213	+	74
15	60502831	60502898	-	67
15	60548014	60548067	-	53
15	61490012	61490069	-	57
15	61537277	61537336	-	59
15	62759434	62759489	-	55
15	63157034	63157091	+	57
15	63311666	63311727	-	61
15	64207312	64207367	-	55
15	64257900	64257970	-	70
15	64573804	64573867	+	63
15	65611496	65611554	+	58
15	66643769	66643843	+	74
15	68801727	68801793	-	66
15	68922333	68922399	-	66
15	71338458	71338519	-	61
15	71474713	71474777	-	64
15	71632869	71632938	+	69
15	71632873	71632934	-	61
15	71632875	71632936	-	61
15	72897414	72897476	-	62
15	73046966	73047038	+	72
15	73046967	73047039	-	72
15	73046969	73047035	+	66
[truncated: 3,102 more rows]
