# Supplementary material for: Tissue-Specific Expression and Regulatory Networks of Pig MicroRNAome
Source: PLoS One. 2014 Apr 3;9(4):e89755. doi: 10.1371/journal.pone.0089755 (PMC3974652; doi:10.1371/journal.pone.0089755)
Supplement: Table S3 — Responding probes in the experiments for the identification of the 5′-end of miRNAs. (XLS) [file pone.0089755.s003.xls]

## Sheet: Table C 3'-end Significance 75%
Table ST3. Responding probes in the experiments for the identification of the 3'-end of miRNAs
miRNA Name_Chromosome_Start-pre-miRNA_Stop-pre-miRNA_Strand_Arm-of-the-pre-miRNA_Probe-shift
hsa-mir-193a_12_41119428_41119516_-_5p_1
prediction_11_44147846_44147907_+_3p_5
known_ssc-mir-128_1
known_ssc-mir-128_2
prediction_6_11759823_11759891_+_3p_-5
prediction_14_94188229_94188307_-_5p_-5
ENSSSCT00000020300_5_16789335_16789408_+_5p_12
ENSSSCT00000021434_13_130664293_130664374_+_5p_11
ggo-mir-99a_13_130664293_130664374_+_5p_11
prediction_9_25400874_25400934_-_5p_16
prediction_1_245536575_245536645_+_3p_0
prediction_3_122788248_122788318_+_3p_9
oan-mir-122_1_169284198_169284309_-_5p_16
ENSSSCT00000019822_1_147227351_147227497_-_3p_5
prediction_7_80897887_80897954_+_5p_-5
known_ssc-mir-302a_1
known_ssc-mir-302a_2
prediction_7_119600761_119600823_+_5p_-5
prediction_8_56181619_56181690_+_3p_-5
known_ssc-mir-155_1
known_ssc-mir-155_2
prediction_12_28606081_28606156_-_5p_-5
prediction_11_20232991_20233052_-_3p_10
prediction_9_63373243_63373304_-_3p_16
dre-mir-19a_11_60972736_60972825_+_5p_-5
prediction_3_37589526_37589600_+_5p_-2
prediction_2_6885250_6885310_+_3p_-5
known_ssc-mir-95_2
known_ssc-mir-95_1
prediction_2_63153815_63153886_-_3p_-5
prediction_18_8420144_8420218_-_3p_16
ENSSSCT00000020217_7_29626545_29626654_+_3p_-5
prediction_10_61765141_61765215_-_5p_-4
prediction_X_61500398_61500454_-_5p_-4
prediction_5_29429047_29429114_+_5p_-5
eca-mir-220b-2_7_2848581_2848663_-_5p_16
known_ssc-mir-190_1
known_ssc-mir-190_2
prediction_2_36396701_36396773_-_5p_-5
prediction_X_27888528_27888601_-_5p_-1
prediction_X_27888533_27888600_-_5p_-2
prediction_1_20142383_20142440_+_3p_-5
prediction_1_267848155_267848222_-_3p_14
prediction_12_23210193_23210266_-_3p_9
prediction_12_23210196_23210263_-_3p_6
prediction_12_23210197_23210266_-_3p_5
prediction_12_23210199_23210268_-_3p_3
ggo-mir-219_7_29626545_29626655_+_3p_-5
prediction_1_59884629_59884686_+_3p_-4
known_ssc-mir-138-2_1
known_ssc-mir-138-2_2
known_ssc-let-7e_1
known_ssc-let-7e_2
prediction_14_74196070_74196143_-_5p_5
prediction_9_50367748_50367818_-_5p_5
prediction_13_121414942_121415016_-_3p_-5
prediction_13_110926088_110926161_-_3p_15
prediction_2_78442718_78442780_+_3p_-4
prediction_14_88964154_88964227_+_5p_-5
prediction_14_88853182_88853255_+_5p_-5
prediction_13_8322305_8322376_-_3p_-5
prediction_1_191689912_191689974_+_3p_-5
prediction_4_14700135_14700204_+_3p_15
prediction_5_51141402_51141470_-_5p_-5
prediction_2_117088683_117088746_+_3p_7
prediction_6_121529229_121529290_-_3p_-5
prediction_6_38856807_38856881_-_5p_14
prediction_6_38856814_38856873_-_5p_6
prediction_6_38746988_38747062_-_5p_14
prediction_6_38746995_38747054_-_5p_6
prediction_1_134970769_134970829_+_3p_5
known_ssc-mir-17_1
known_ssc-mir-17_2
known_ssc-mir-199b*_2
known_ssc-mir-199b*_1
prediction_2_78442574_78442645_-_5p_-3
prediction_17_60928797_60928857_-_5p_-3
prediction_15_14393477_14393541_-_3p_16
known_ssc-let-7i_1
known_ssc-let-7i_2
prediction_7_80548894_80548957_-_3p_-3
prediction_8_94574424_94574489_+_5p_-5
prediction_10_37492770_37492833_-_5p_-5
ENSSSCT00000020238_7_63697110_63697262_-_3p_7
cfa-mir-195_12_49575898_49575959_+_3p_14
prediction_4_84709385_84709453_+_5p_-5
bta-mir-2411_4_99530700_99530777_-_3p_-5
known_ssc-mir-122a_1
known_ssc-mir-122a_2
bta-mir-23b_10_26149017_26149077_-_3p_2
ENSSSCT00000021051_10_26149017_26149077_-_3p_2
hsa-mir-99b_6_39533215_39533285_+_3p_-5
ENSSSCT00000020330_6_39533215_39533285_+_3p_-5
known_ssc-mir-124a-1_2
known_ssc-mir-124a-1_1
known_ssc-mir-124a-3_1
known_ssc-mir-124a-3_2
known_ssc-mir-124a-2_1
known_ssc-mir-124a-2_2
oan-mir-100_9_47702717_47702798_-_5p_11
ENSSSCT00000020912_9_47702717_47702798_-_5p_11
known_ssc-mir-22b_1
known_ssc-mir-22b_2
ENSSSCT00000020014_7_133834347_133834429_+_5p_14
prediction_8_26929228_26929300_-_5p_-5
prediction_8_26929230_26929302_-_5p_-3
prediction_13_98792875_98792943_-_3p_-5
known_ssc-mir-135-2_1
known_ssc-mir-135-2_2
known_ssc-mir-135-1_2
known_ssc-mir-135-1_1
known_ssc-mir-199b_1
known_ssc-mir-199b_2
prediction_14_11542637_11542693_-_3p_-4
prediction_8_74332538_74332601_+_5p_-5
known_ssc-mir-27b_2
known_ssc-mir-27b_1
prediction_6_4662927_4662996_+_3p_-5
prediction_2_55518460_55518523_-_5p_-4
known_ssc-mir-185_2
known_ssc-mir-185_1
prediction_4_49573116_49573183_-_5p_-5
hsa-mir-1826_6_255056_255142_-_3p_13
ENSSSCT00000019979_6_255056_255142_-_3p_13
prediction_6_56820715_56820783_+_5p_-5
ENSSSCT00000021088_6_121824296_121824388_-_5p_16
ENSSSCT00000021133_8_86931991_86932076_+_3p_9
prediction_2_104945625_104945696_+_3p_-5
mmu-mir-497_12_49575587_49575671_+_3p_-4
known_ssc-mir-20b_2
known_ssc-mir-20b_1
ENSSSCT00000020728_1_284963090_284963172_-_3p_-2
ENSSSCT00000021024_1_284509638_284509720_+_3p_-2
prediction_16_5725808_5725875_-_5p_-1
prediction_6_120174500_120174560_+_3p_9
prediction_6_84508051_84508109_+_5p_9
prediction_X_17190586_17190659_-_3p_5
ggo-mir-29b-2_9_127173766_127173847_+_3p_7
ENSSSCT00000020629_9_127173766_127173847_+_3p_7
known_ssc-mir-29c_1
known_ssc-mir-29c_2
ENSSSCT00000020324_3_36654389_36654480_+_5p_16
prediction_7_56058171_56058236_-_5p_-5
prediction_6_19931648_19931715_-_3p_-5
cfa-mir-196b_18_44179804_44179862_+_3p_13
cfa-mir-196b_18_44205858_44205916_+_3p_13
prediction_7_88174800_88174854_+_5p_2
prediction_14_74099115_74099184_-_5p_-4
prediction_4_53073009_53073074_-_3p_-5
prediction_13_104082811_104082865_-_3p_5
prediction_2_106350061_106350119_+_5p_15
prediction_6_62621148_62621214_-_3p_-5
prediction_12_51048254_51048325_+_5p_-5
prediction_12_50934352_50934423_+_5p_-5
prediction_4_72352574_72352642_+_5p_16
prediction_16_72991545_72991607_+_3p_-4
prediction_3_115062979_115063053_+_3p_6
known_ssc-mir-182*_1
known_ssc-mir-182*_2
known_ssc-mir-101b_1
known_ssc-mir-101b_2
prediction_4_3761375_3761434_-_5p_12
ENSSSCT00000021200_1_267441301_267441374_-_3p_-2
prediction_7_114962274_114962333_-_3p_-5
bta-mir-769_6_36259082_36259201_-_3p_15
ENSSSCT00000020560_6_36259082_36259200_-_3p_15
prediction_5_3355304_3355365_+_5p_-4
ENSSSCT00000019954_X_58683803_58683888_+_3p_14
known_ssc-mir-22a_2
known_ssc-mir-22a_1
known_ssc-mir-10b_1
known_ssc-mir-10b_2
prediction_18_6969302_6969364_-_5p_-1
ggo-mir-105_X_121722372_121722453_+_5p_15
ENSSSCT00000021441_X_121722372_121722453_+_5p_15
prediction_14_126612664_126612733_-_3p_10
prediction_14_126612668_126612733_-_3p_6
prediction_14_126612666_126612731_-_3p_8
prediction_16_68474541_68474601_+_5p_-4
prediction_14_141839457_141839534_-_3p_10
prediction_14_141839463_141839528_-_3p_4
prediction_1_249721522_249721588_+_3p_-5
known_PN2_2
known_PN2_1
known_ssc-mir-99a_1
known_ssc-mir-99a_2
known_ssc-mir-181b_1
known_ssc-mir-181b_2
prediction_7_105005742_105005801_-_3p_-5
ENSSSCT00000020716_2_17100314_17100408_-_3p_4
bta-mir-129-2_2_17100314_17100408_-_3p_4
prediction_7_25589219_25589293_+_3p_-5
dre-mir-92a-1_11_60973153_60973238_+_3p_-5
prediction_10_47302_47371_+_5p_-2
prediction_12_16269687_16269763_+_5p_0
known_ssc-mir-323_1
known_ssc-mir-323_2
known_ssc-mir-125b-1_2
known_ssc-mir-125b-1_1
known_ssc-mir-153_2
known_ssc-mir-153_1
known_ssc-mir-153-1_2
known_ssc-mir-153-1_1
prediction_15_71632869_71632938_+_5p_-3
known_ssc-mir-352_1
known_ssc-mir-352_2
prediction_11_39393311_39393373_+_3p_-3
prediction_X_97285131_97285200_-_5p_-1
known_ssc-mir-19a_1
known_ssc-mir-19a_2
prediction_15_5404212_5404287_-_5p_-3
ENSSSCT00000020289_15_130584584_130584725_+_5p_-5
known_ssc-mir-126_2
known_ssc-mir-126_1
known_ssc-mir-204_1
known_ssc-mir-204_2
prediction_11_66560616_66560672_-_3p_-5
prediction_18_12026446_12026500_-_3p_-5
prediction_3_40740535_40740595_-_5p_16
ENSSSCT00000020348_9_126011587_126011656_-_5p_5
prediction_4_63275555_63275613_-_3p_-5
prediction_13_104798802_104798869_-_3p_9
prediction_2_63700909_63700976_-_3p_-5
prediction_15_14390446_14390503_-_3p_-5
prediction_9_35584176_35584239_-_3p_-5
prediction_5_15744260_15744325_+_5p_-5
mmu-mir-208a_7_82117415_82117498_-_5p_-5
oan-mir-208_7_82117406_82117517_-_5p_14
prediction_6_31701852_31701920_+_3p_5
prediction_X_105219338_105219398_-_5p_-5
prediction_X_105263944_105264004_-_5p_-5
prediction_3_99384375_99384446_+_5p_9
prediction_9_41220955_41221027_-_5p_-5
prediction_17_60928797_60928857_-_3p_12
prediction_1_46508703_46508763_+_5p_-2
ENSSSCT00000021418_2_56861158_56861228_-_3p_6
ggo-mir-23a_2_56861158_56861231_-_3p_6
hsa-mir-491_1_210973874_210973958_-_5p_3
ENSSSCT00000021144_1_210973874_210973958_-_5p_3
prediction_8_112163235_112163303_+_5p_-4
prediction_6_41110293_41110361_-_3p_-3
prediction_6_41110295_41110363_-_3p_-5
prediction_8_29373598_29373658_-_3p_-2
prediction_X_115373839_115373896_-_5p_16
prediction_9_59406035_59406101_-_5p_10
prediction_3_13796508_13796578_-_5p_-5
prediction_3_78047342_78047394_-_3p_-4
hsa-mir-9-1_4_97746790_97746879_-_5p_-5
ENSSSCT00000021468_4_97531325_97531414_+_5p_-5
ENSSSCT00000021470_4_97746790_97746879_-_5p_-5
hsa-mir-9-1_4_97531325_97531414_+_5p_-5
known_ssc-mir-122_2
known_ssc-mir-122_1
prediction_13_6986698_6986758_-_3p_5
prediction_4_17906412_17906482_+_5p_-5
hsa-mir-210_2_331287_331397_+_5p_8
ENSSSCT00000020678_2_331298_331396_+_5p_-3
known_ssc-mir-200a_1
known_ssc-mir-200a_2
prediction_14_74196068_74196141_-_5p_2
prediction_14_74196070_74196143_-_5p_4
known_ssc-mir-130c_1
known_ssc-mir-130c_2
prediction_14_64526906_64526964_-_5p_1
prediction_1_82766901_82766969_+_3p_-5
known_ssc-mir-128a_2
known_ssc-mir-128a_1
known_ssc-mir-101a_2
known_ssc-mir-101a_1
prediction_15_45424235_45424297_-_3p_-2
prediction_6_37623878_37623940_-_3p_-5
bta-mir-212_12_45599903_45600014_-_3p_16
mdo-mir-212_12_45599907_45599998_-_3p_12
ENSSSCT00000021491_12_45599921_45599983_-_3p_-2
cfa-mir-212_12_45599921_45599983_-_3p_-2
prediction_18_6969297_6969373_-_5p_0
prediction_4_71226777_71226841_-_5p_0
prediction_7_17801009_17801072_-_3p_9
prediction_7_17801007_17801070_-_3p_11
prediction_13_100213995_100214055_-_5p_1
prediction_13_100293034_100293096_-_5p_0
prediction_13_100293033_100293097_-_5p_1
prediction_13_100213991_100214055_-_5p_1
prediction_13_100213993_100214053_-_5p_-1
prediction_13_100293036_100293098_-_5p_2
known_ssc-mir-92b_2
known_ssc-mir-92b_1
prediction_17_48210901_48210960_-_5p_1
prediction_17_48210895_48210954_-_5p_-5
prediction_17_48330553_48330612_+_5p_0
prediction_17_48210903_48210962_-_5p_3
prediction_X_3505059_3505127_+_5p_3
prediction_X_3505053_3505132_+_5p_9
prediction_13_104483151_104483208_-_5p_-5
prediction_3_113574142_113574213_-_3p_-5
prediction_7_24491625_24491703_+_3p_3
prediction_13_38492736_38492795_-_3p_7
known_PN7_2
known_PN7_1
prediction_2_18185335_18185400_+_5p_-5
prediction_6_57461485_57461557_-_5p_-5
prediction_6_76682382_76682446_+_5p_-5
prediction_2_18185332_18185403_+_5p_-2
prediction_13_60423431_60423501_-_5p_-5
prediction_17_59629191_59629259_+_5p_-2
prediction_13_60423429_60423503_-_5p_-3
prediction_12_14483713_14483789_-_5p_2
prediction_5_31459211_31459277_-_3p_-5
prediction_9_82118144_82118209_+_3p_-4
prediction_14_11036731_11036802_+_3p_-5
known_ssc-mir-144_2
known_ssc-mir-144_1
prediction_1_27225704_27225771_+_5p_-5
known_ssc-let-7b_2
known_ssc-let-7b_1
cfa-mir-491_1_210973888_210973942_-_3p_5
prediction_6_28257443_28257508_-_5p_-5
prediction_5_24024533_24024591_-_5p_-5
prediction_8_54040131_54040199_+_5p_-5
prediction_16_65588757_65588822_+_5p_0
prediction_4_63275551_63275609_-_3p_-5
prediction_8_104758591_104758648_-_3p_-5
bta-mir-181a-2_1_280333976_280334086_+_5p_-5
prediction_18_15370023_15370086_-_5p_10
prediction_3_117032570_117032635_+_5p_-5
prediction_3_68219883_68219946_-_5p_-4
prediction_3_68219888_68219945_-_5p_-5
prediction_15_101485057_101485121_-_3p_16
known_ssc-mir-324_2
known_ssc-mir-324_1
prediction_1_267595589_267595648_-_5p_-5
prediction_1_29851747_29851812_-_5p_-3
known_PN6_2
known_PN6_1
known_ssc-mir-211_2
known_ssc-mir-211_1
prediction_10_37492762_37492837_-_5p_-3
prediction_1_217754999_217755061_-_3p_3
known_ssc-mir-184_2
known_ssc-mir-184_1
ENSSSCT00000019754_13_101111622_101111699_-_5p_-5
ENSSSCT00000021517_1_107486540_107486614_-_3p_16
prediction_4_75504899_75504969_-_5p_8
prediction_10_2602805_2602869_+_5p_-1
prediction_3_117032575_117032634_-_5p_-5
prediction_12_3736711_3736780_+_3p_9
prediction_15_119119064_119119124_-_5p_1
prediction_1_161454224_161454283_-_5p_6
prediction_1_161520978_161521037_-_5p_6
prediction_5_59255364_59255424_+_3p_16
prediction_7_68411759_68411829_+_3p_-2
known_ssc-mir-93a_2
known_ssc-mir-93a_1
known_ssc-mir-27e_1
known_ssc-mir-27e_2
known_ssc-mir-124a_2
known_ssc-mir-124a_1
known_ssc-let-7a_1
known_ssc-let-7a_2
known_ssc-mir-92-1_1
known_ssc-mir-92-1_2
prediction_5_12086360_12086425_-_5p_5
prediction_5_12086358_12086423_-_5p_3
prediction_2_14133202_14133266_-_5p_-3
prediction_2_14133200_14133264_-_5p_-5
prediction_12_49070831_49070907_-_5p_-2
prediction_2_63805969_63806031_+_5p_-5
prediction_2_127541820_127541874_+_5p_11
prediction_6_11759822_11759890_-_5p_-5
known_ssc-mir-133c_1
known_ssc-mir-133c_2
prediction_6_867577_867644_+_5p_-5
prediction_6_867574_867647_+_5p_-2
prediction_4_69095321_69095391_-_5p_3
known_ssc-mir-191_1
known_ssc-mir-191_2
prediction_4_99658386_99658451_+_3p_-5
known_ssc-mir-423_2
known_ssc-mir-423_1
prediction_X_106095645_106095707_+_3p_-5
prediction_13_15819448_15819523_+_5p_1
eca-mir-769_6_36259103_36259182_-_3p_-5
ENSSSCT00000020578_6_40293229_40293320_+_5p_11
hsa-mir-935_6_40351574_40351665_+_5p_11
ENSSSCT00000021441_X_121722372_121722453_+_5p_16
ggo-mir-105_X_121722372_121722453_+_5p_16
prediction_17_40609367_40609426_-_5p_-4
known_ssc-mir-26b_1
known_ssc-mir-26b_2
prediction_14_65766924_65766981_-_5p_-5
prediction_5_8723226_8723292_-_5p_-5
prediction_15_73221914_73221991_-_5p_-3
prediction_15_73111418_73111495_-_5p_-3
known_ssc-mir-320_2
known_ssc-mir-320_1
known_ssc-mir-140_2
known_ssc-mir-140_1
mmu-mir-2144_6_250938_251009_-_3p_9
prediction_13_98792877_98792945_-_3p_-5
ENSSSCT00000021346_3_40549758_40549841_-_3p_-5
ENSSSCT00000020830_3_40637122_40637205_-_3p_-5
prediction_15_111009634_111009690_-_5p_12
known_ssc-mir-99b_2
known_ssc-mir-99b_1
prediction_5_31459211_31459277_-_5p_-5
ENSSSCT00000020965_12_45599471_45599572_-_5p_2
hsa-mir-132_12_45599471_45599572_-_5p_2
prediction_15_133858489_133858548_-_5p_-5
prediction_13_5574230_5574291_+_3p_15
prediction_14_59846725_59846788_-_3p_10
prediction_4_135179770_135179837_+_5p_-1
bta-mir-2483_X_100547915_100547995_-_5p_5
known_ssc-mir-142a_2
known_ssc-mir-142a_1
prediction_6_79167862_79167928_-_5p_-5
ENSSSCT00000021098_15_14550873_14550955_-_3p_-5
age-mir-128_15_14550873_14550955_-_3p_-5
prediction_5_14165691_14165761_-_3p_-4
prediction_14_67847633_67847703_+_5p_-2
prediction_8_117825592_117825652_-_5p_14
prediction_3_69853301_69853358_-_5p_15
prediction_13_87414738_87414795_+_3p_-5
known_ssc-mir-192_2
known_ssc-mir-192_1
ENSSSCT00000019965_14_69493245_69493336_-_3p_16
hsa-mir-1296_14_69493245_69493337_-_3p_16
mmu-mir-2140_6_250418_250472_-_3p_-5
prediction_14_59435670_59435729_-_3p_16
prediction_1_50360147_50360209_+_5p_-5
prediction_5_94180236_94180295_-_3p_-5
prediction_14_35098322_35098381_-_5p_4
known_ssc-mir-19b-1_2
known_ssc-mir-19b-1_1
prediction_7_6185956_6186018_-_3p_9
known_ssc-mir-24b_2
known_ssc-mir-24b_1
prediction_14_74196070_74196143_-_3p_15
prediction_14_94422507_94422579_-_3p_13
prediction_14_94422514_94422576_-_3p_6
prediction_14_94422512_94422574_-_3p_8
prediction_14_94422511_94422575_-_3p_9
prediction_6_28139587_28139645_-_5p_10
prediction_12_17392483_17392562_+_5p_3
prediction_12_17392487_17392557_+_5p_-1
prediction_12_19382244_19382306_-_3p_-5
prediction_12_19382241_19382308_-_3p_-2
prediction_14_32910229_32910299_+_5p_6
prediction_10_1347056_1347119_+_3p_12
known_ssc-mir-375_1
known_ssc-mir-375_2
prediction_5_65447567_65447637_+_3p_-4
prediction_15_14179501_14179567_+_5p_-3
prediction_13_23688038_23688100_-_5p_-4
mmu-mir-2143-2_6_251367_251451_-_3p_-4
ENSSSCT00000020150_12_34201564_34201656_+_5p_16
gga-mir-21_12_34201564_34201661_+_5p_16
prediction_6_94737182_94737239_+_5p_-4
known_ssc-mir-450a_2
known_ssc-mir-450a_1
prediction_1_77709386_77709457_+_5p_4
prediction_13_60423429_60423503_+_5p_-2
prediction_13_60423432_60423502_+_5p_-5
prediction_5_92143451_92143526_+_5p_-2
prediction_1_77709389_77709454_+_5p_1
bta-mir-2447_8_116445133_116445209_+_5p_-1
hsa-mir-1826_6_255056_255142_-_3p_12
ENSSSCT00000019979_6_255056_255142_-_3p_12
bta-mir-30b_4_5733577_5733665_+_3p_16
ENSSSCT00000020276_11_60973159_60973237_+_3p_-5
ENSSSCT00000020708_4_93358494_93358585_-_5p_-3
prediction_16_6383782_6383843_-_3p_-5
prediction_2_55860712_55860777_+_3p_-5
prediction_13_67897811_67897866_-_3p_13
prediction_6_87871760_87871824_+_5p_-5
prediction_6_87871757_87871827_+_5p_-2
prediction_8_27843808_27843877_-_5p_-5
prediction_6_119761655_119761718_+_5p_5
known_ssc-mir-320d_1
known_ssc-mir-320d_2
known_ssc-mir-204a_1
known_ssc-mir-204a_2
known_ssc-mir-224_2
known_ssc-mir-224_1
known_ssc-mir-208_1
known_ssc-mir-208_2
prediction_1_203342980_203343041_+_3p_16
prediction_7_84918647_84918711_+_5p_-5
known_ssc-let-7g_2
known_ssc-let-7g_1
prediction_12_24482490_24482563_+_5p_-4
ENSSSCT00000020111_14_138681156_138681261_-_3p_8
prediction_15_120842712_120842780_+_3p_-5
prediction_2_45368965_45369034_-_5p_-5
known_ssc-mir-133d_2
known_ssc-mir-133d_1
oan-mir-183_18_17172201_17172332_-_3p_1
prediction_X_12823360_12823431_-_5p_-4
prediction_9_35584171_35584244_-_5p_1
prediction_16_22941241_22941303_-_5p_-3
prediction_1_183180604_183180668_-_5p_-3
prediction_7_129304040_129304114_-_5p_-5
prediction_3_51912678_51912743_-_5p_-4
prediction_1_183180601_183180671_-_5p_0
prediction_1_183180599_183180669_-_5p_-2
prediction_16_22941236_22941304_-_5p_-2
prediction_9_35584176_35584239_-_5p_-4
prediction_16_15898940_15899012_+_5p_1
prediction_3_51912680_51912745_-_5p_-2
prediction_3_51912675_51912746_-_5p_-1
cfa-mir-22_12_45319052_45319112_+_3p_0
ENSSSCT00000020113_12_45319038_45319123_+_3p_11
prediction_X_75888025_75888082_+_3p_-5
prediction_13_114404551_114404618_+_5p_-1
known_ssc-mir-92_1
known_ssc-mir-92_2
ENSSSCT00000021536_1_53848997_53849104_-_5p_16
ssc-mir-30a_1_53848997_53849104_-_5p_16
known_ssc-mir-497_2
known_ssc-mir-497_1
ENSSSCT00000020039_8_92258011_92258079_+_3p_-4
hsa-mir-367_8_92258011_92258079_+_3p_-4
ENSSSCT00000021293_7_133923085_133923157_+_3p_14
hsa-mir-665_7_133923085_133923157_+_3p_14
prediction_18_8450421_8450483_+_5p_5
prediction_3_53860493_53860554_-_5p_-5
prediction_15_53410691_53410756_-_5p_2
prediction_15_53410693_53410758_-_5p_4
prediction_4_16984106_16984165_+_5p_-3
prediction_4_49562615_49562675_-_3p_-3
prediction_1_203136132_203136189_+_3p_9
known_ssc-mir-126*_2
known_ssc-mir-126*_1
prediction_7_103620291_103620359_-_5p_-2
prediction_7_103620286_103620360_-_5p_-1
known_ssc-mir-18_2
known_ssc-mir-18_1
prediction_1_163939720_163939787_+_5p_-4
prediction_6_13395617_13395681_+_5p_-4
prediction_7_37330452_37330517_-_5p_-1
prediction_1_163786264_163786331_+_5p_-4
prediction_5_46644860_46644933_+_5p_-1
prediction_14_24422263_24422320_+_5p_6
prediction_6_13395614_13395682_+_5p_-1
prediction_7_37330450_37330515_-_5p_-3
prediction_13_21447221_21447293_-_5p_-4
prediction_9_71879411_71879475_+_5p_-4
prediction_5_20586017_20586080_-_5p_-1
prediction_5_20586016_20586081_-_5p_0
prediction_2_56012600_56012666_-_3p_-5
prediction_17_51004408_51004467_+_5p_12
prediction_17_11369635_11369703_-_3p_5
prediction_14_51473985_51474046_-_3p_-5
known_ssc-mir-7_2
known_ssc-mir-7_1
known_ssc-mir-30b_2
known_ssc-mir-30b_1
prediction_6_102617170_102617224_-_3p_8
known_ssc-mir-382_2
known_ssc-mir-382_1
prediction_1_187583640_187583700_+_3p_-5
prediction_X_104392929_104392992_+_5p_-5
prediction_17_61133866_61133929_+_5p_-5
prediction_6_75709608_75709661_+_3p_2
prediction_5_47634418_47634488_+_5p_-4
known_ssc-mir-152_2
known_ssc-mir-152_1
prediction_5_12271848_12271902_+_5p_-5
prediction_16_12865001_12865075_-_5p_-5
prediction_4_98667652_98667714_+_5p_-5
prediction_9_10346721_10346793_+_5p_-5
known_ssc-mir-24_2
known_ssc-mir-24_1
known_ssc-mir-24a_1
known_ssc-mir-24a_2
known_ssc-mir-210_2
known_ssc-mir-210_1
known_ssc-mir-214_2
known_ssc-mir-214_1
known_ssc-mir-106b_1
known_ssc-mir-106b_2
prediction_7_41912865_41912927_-_3p_-2
prediction_8_26929231_26929297_-_5p_-5
prediction_17_2149606_2149661_+_5p_15
known_ssc-mir-29b_1
known_ssc-mir-29b_2
prediction_1_146333652_146333723_-_5p_16
prediction_7_108843631_108843688_+_5p_7
prediction_17_62821482_62821542_+_5p_0
prediction_17_63095930_63095990_-_5p_0
prediction_10_4096742_4096808_+_3p_-5
prediction_14_50823024_50823089_+_3p_-5
prediction_10_32424164_32424229_+_3p_16
prediction_3_9468573_9468632_+_5p_-5
prediction_14_118326581_118326649_-_3p_5
prediction_14_118411980_118412048_+_3p_5
prediction_1_213857704_213857770_+_3p_0
prediction_17_43412112_43412175_-_5p_-5
hsa-mir-190b_4_99584644_99584723_+_5p_-5
ENSSSCT00000020221_4_99584644_99584723_+_5p_-5
prediction_13_86059773_86059827_+_3p_0
prediction_13_86059764_86059836_+_3p_9
prediction_13_86059768_86059830_+_3p_3
prediction_5_17349754_17349814_-_5p_16
prediction_3_51136884_51136940_+_3p_-5
prediction_1_17667697_17667766_+_5p_-5
prediction_3_117907143_117907198_+_3p_-5
known_ssc-mir-1224-3p_2
known_ssc-mir-1224-3p_1
prediction_13_109090106_109090178_-_3p_13
prediction_13_109090104_109090176_-_3p_15
eca-mir-220b-2_6_171241_171323_-_3p_8
prediction_15_126958503_126958572_+_3p_14
prediction_13_89530240_89530311_+_5p_-5
ENSSSCT00000020346_16_52377039_52377118_+_3p_-1
known_ssc-mir-16a_1
known_ssc-mir-16a_2
prediction_4_38894906_38894966_+_3p_16
prediction_15_100197861_100197933_-_3p_13
prediction_15_100197859_100197931_-_3p_15
prediction_15_100197866_100197925_-_3p_8
oan-mir-129_18_18269468_18269596_+_3p_1
prediction_4_57750575_57750646_-_5p_-3
prediction_4_57750569_57750648_-_5p_-1
prediction_4_57750573_57750644_-_5p_-5
prediction_13_121422750_121422826_-_5p_5
prediction_13_121422758_121422817_-_5p_-4
prediction_6_119761655_119761718_+_5p_4
eca-mir-1905c_2_46561890_46561973_+_3p_-2
ENSSSCT00000020806_2_46561891_46561973_+_3p_-2
prediction_10_22092437_22092504_-_5p_3
known_ssc-let-7d_1
known_ssc-let-7d_2
prediction_3_65092217_65092277_-_5p_15
prediction_8_65638723_65638789_+_5p_-4
prediction_5_64913760_64913825_-_3p_1
prediction_13_104083430_104083490_+_3p_10
prediction_9_37494321_37494385_-_3p_-5
cfa-mir-138a_13_23336889_23336951_+_3p_-5
bta-mir-138-1_13_23336869_23336966_+_3p_10
ENSSSCT00000021566_13_23336889_23336951_+_3p_-5
ENSSSCT00000021279_14_52703711_52703787_+_3p_7
hsa-mir-185_14_52703707_52703789_+_3p_9
prediction_11_51838892_51838953_+_5p_-4
prediction_16_63629178_63629244_+_3p_11
prediction_7_30914525_30914601_+_5p_16
prediction_3_8934027_8934092_+_3p_-5
prediction_4_11347284_11347343_+_3p_11
prediction_4_11347281_11347346_+_3p_14
prediction_12_38319738_38319804_+_5p_-5
prediction_12_38319735_38319807_+_5p_-2
prediction_7_36127891_36127960_+_3p_-5
prediction_X_35230318_35230386_+_5p_-2
prediction_X_35230321_35230383_+_5p_-5
prediction_1_87072837_87072900_+_5p_-5
prediction_2_70129837_70129905_+_5p_-5
known_ssc-mir-320a_1
known_ssc-mir-320a_2
prediction_2_108628142_108628204_-_5p_-5
ENSSSCT00000019942_13_26180000_26180077_-_5p_6
prediction_15_57823777_57823831_-_3p_16
prediction_2_49023394_49023462_+_3p_-5
prediction_2_49023396_49023462_+_3p_-5
prediction_5_75093795_75093866_+_3p_-5
ENSSSCT00000020476_18_5054286_5054404_-_3p_11
hsa-mir-671_18_5054286_5054404_-_3p_11
prediction_3_40990747_40990811_-_3p_-5
prediction_3_41035254_41035320_+_3p_-2
ENSSSCT00000020848_12_37773635_37773707_+_3p_-5
prediction_13_31999783_31999843_-_5p_9
known_ssc-mir-26a_2
known_ssc-mir-26a_1
known_ssc-mir-29a_2
known_ssc-mir-29a_1
known_ssc-mir-15b_2
known_ssc-mir-15b_1
prediction_8_9745745_9745814_-_5p_-1
prediction_8_9745750_9745813_-_5p_-2
prediction_4_98411653_98411720_+_3p_-5
known_ssc-mir-139_2
known_ssc-mir-139_1
prediction_11_20656838_20656912_-_5p_-2
rno-mir-187_6_83322545_83322649_-_5p_3
ENSSSCT00000020706_6_83322545_83322654_-_5p_8
prediction_6_55912247_55912317_+_3p_-5
prediction_18_25616099_25616162_+_5p_-4
prediction_18_25616099_25616160_+_5p_-4
ptr-mir-876_10_36141558_36141638_+_3p_16
prediction_4_18552196_18552256_-_3p_16
known_ssc-mir-215_2
known_ssc-mir-215_1
prediction_14_74283239_74283302_-_5p_-5
prediction_14_92906399_92906459_-_5p_-5
prediction_2_27000221_27000299_-_5p_-5
prediction_1_230202271_230202332_-_3p_-5
prediction_1_247695261_247695328_-_5p_-5
known_ssc-mir-505_2
known_ssc-mir-505_1
known_ssc-mir-15c_2
known_ssc-mir-15c_1
prediction_10_1214017_1214068_+_5p_6
prediction_11_3776451_3776512_-_3p_-3
prediction_13_119803135_119803201_+_3p_12
known_ssc-mir-30a_1
known_ssc-mir-30a_2
prediction_6_82565847_82565915_-_3p_-5
known_ssc-mir-142_1
known_ssc-mir-142_2
prediction_X_56956483_56956556_+_5p_-5
prediction_12_34544868_34544935_-_5p_-5
prediction_12_34544870_34544937_-_5p_-3
prediction_12_34668881_34668948_-_5p_-5
prediction_12_34668883_34668950_-_5p_-3
ENSSSCT00000020409_5_29963949_29964040_+_5p_14
ENSSSCT00000021201_5_29805694_29805785_+_5p_14
prediction_4_7744932_7744990_+_3p_-5
prediction_2_16111114_16111185_+_3p_15
prediction_3_105371909_105371966_-_3p_16
prediction_3_105371909_105371975_-_3p_16
prediction_11_3776451_3776512_-_5p_11
known_ssc-mir-199a_2
known_ssc-mir-199a_1
ENSSSCT00000020082_7_120781195_120781252_+_3p_15
ENSSSCT00000020122_7_129353742_129353824_+_5p_-1
prediction_5_56576894_56576966_+_3p_-5
prediction_5_56509313_56509385_+_3p_-5
prediction_3_43312207_43312268_-_3p_-3
prediction_X_77646192_77646256_+_3p_16
prediction_X_77404719_77404783_+_3p_16
ENSSSCT00000020296_2_136265608_136265674_+_3p_2
prediction_17_27406548_27406604_-_3p_-3
prediction_3_18071381_18071449_-_5p_-4
prediction_13_114404551_114404618_+_5p_-2
prediction_3_90187119_90187179_+_5p_-5
prediction_2_56012600_56012666_-_5p_-3
prediction_11_27165811_27165871_+_5p_-1
prediction_5_84640892_84640963_+_5p_1
prediction_17_53580253_53580330_-_5p_-1
prediction_17_47170291_47170358_+_5p_-2
prediction_14_74283236_74283305_-_5p_-4
prediction_14_74223641_74223709_-_5p_-5
known_ssc-mir-103-2_2
known_ssc-mir-103_1
known_ssc-mir-103-2_1
known_ssc-mir-103_2
prediction_7_80897892_80897949_+_5p_-4
prediction_14_93761280_93761340_-_5p_16
prediction_7_41972359_41972422_-_5p_-2
prediction_1_102795811_102795876_-_5p_-5
prediction_14_61690864_61690920_+_3p_-1
prediction_2_9860928_9860997_+_5p_-5
known_ssc-mir-1c_1
known_ssc-mir-1c_2
known_ssc-mir-326_1
known_ssc-mir-326_2
prediction_17_11734367_11734433_-_5p_-3
prediction_17_11833480_11833546_-_5p_-3
prediction_17_11833477_11833549_-_5p_0
prediction_17_11734364_11734436_-_5p_0
prediction_12_5243142_5243207_+_3p_-5
eca-mir-1291b_5_75055818_75055874_+_3p_1
prediction_8_104609837_104609900_-_5p_-3
prediction_8_104609832_104609905_-_5p_2
prediction_8_104609839_104609902_-_5p_-1
mmu-mir-2182_6_252540_252656_+_3p_-2
ENSSSCT00000020502_9_6808358_6808426_-_3p_14
mdo-mir-139_9_6808356_6808425_-_3p_16
prediction_15_13223998_13224063_-_5p_-4
ENSSSCT00000020485_7_133847437_133847512_+_3p_10
hsa-mir-370_7_133847437_133847512_+_3p_10
prediction_8_71549079_71549136_+_3p_-4
prediction_17_16864611_16864671_+_5p_5
prediction_5_4401223_4401280_+_3p_-5
known_ssc-mir-181a_2
known_ssc-mir-181a_1
prediction_6_916808_916869_-_3p_10
known_ssc-mir-365-1_2
known_ssc-mir-365-1_1
known_ssc-mir-365-2_1
known_ssc-mir-365-2_2
prediction_3_66047358_66047435_-_5p_-4
prediction_14_74283236_74283305_-_5p_-3
prediction_14_74223646_74223708_-_5p_-5
prediction_14_74223641_74223709_-_5p_-4
ENSSSCT00000020411_4_127718030_127718147_-_3p_12
bta-mir-760_4_127718030_127718147_-_3p_12
prediction_4_92547600_92547660_-_3p_16
prediction_12_12927873_12927940_+_5p_-5
prediction_14_35484158_35484217_-_5p_-4
prediction_9_109044654_109044721_+_5p_-5
prediction_3_3466163_3466238_-_5p_-4
prediction_3_3603941_3604016_+_5p_-5
prediction_3_104392561_104392629_+_5p_-5
prediction_7_56323827_56323898_-_3p_-5
prediction_2_138918708_138918772_-_3p_2
prediction_2_138866978_138867042_+_3p_4
prediction_15_99648154_99648216_+_5p_-2
prediction_15_99648157_99648215_+_5p_-5
prediction_15_99648151_99648221_+_5p_1
prediction_8_42313216_42313270_+_5p_15
prediction_6_82565853_82565909_-_5p_-3
prediction_13_86906440_86906511_-_5p_-3
ENSSSCT00000020082_7_120781195_120781252_+_3p_16
known_ssc-mir-133b_1
known_ssc-mir-133b_2
prediction_8_64120842_64120903_-_5p_0
prediction_8_64120846_64120907_-_5p_4
prediction_9_27863890_27863954_+_5p_4
prediction_3_7432171_7432229_-_5p_-5
prediction_3_7191420_7191478_-_5p_-5
prediction_14_115875435_115875495_+_5p_-2
prediction_7_119600761_119600823_+_3p_-5
prediction_14_76085907_76085963_-_3p_3
prediction_13_104082811_104082865_-_5p_13
prediction_3_78047342_78047394_-_3p_-5
prediction_1_274143573_274143630_-_3p_12
prediction_4_9554192_9554260_-_5p_-5
prediction_9_102053728_102053802_+_3p_-2
prediction_9_102201317_102201391_+_3p_-2
prediction_11_8739422_8739489_-_5p_-1
known_ssc-mir-142-3p_1
known_ssc-mir-142-3p_2
prediction_16_65588757_65588822_+_3p_10
prediction_4_7959358_7959426_-_3p_16
prediction_7_74055795_74055865_+_5p_-4
prediction_13_69700174_69700230_+_3p_16
prediction_2_69766543_69766614_-_5p_-4
prediction_14_109056880_109056950_-_5p_-3
prediction_10_27574782_27574844_+_5p_-5
prediction_2_123220328_123220393_-_5p_-4
prediction_1_5548377_5548440_-_5p_-1
prediction_1_5548381_5548444_-_5p_3
prediction_9_7042619_7042679_-_3p_-5
ENSSSCT00000020817_3_29678100_29678195_-_5p_1
prediction_1_228272654_228272717_-_3p_0
cfa-mir-345_7_130622845_130622905_-_5p_16
cfa-mir-345_7_130435932_130435992_+_5p_16
prediction_1_187583640_187583700_+_5p_-1
known_ssc-mir-16_1
known_ssc-mir-16_2
prediction_4_34800474_34800533_-_5p_1
prediction_1_100385836_100385893_+_3p_-4
known_ssc-mir-145_2
known_ssc-mir-145_1
prediction_18_43752163_43752223_-_5p_-4
prediction_18_43752156_43752226_-_5p_-1
prediction_15_8402472_8402541_-_5p_-2
prediction_15_8402474_8402543_-_5p_0
prediction_15_8402476_8402545_-_5p_2
prediction_8_97470302_97470367_+_5p_-4
prediction_7_10120542_10120603_-_5p_-1
prediction_8_35307733_35307789_-_5p_-3
prediction_10_10978580_10978645_+_5p_-5
prediction_8_35307731_35307787_-_5p_-5
prediction_10_10978577_10978646_+_5p_-2
prediction_7_93186234_93186301_+_5p_-5
prediction_1_136805429_136805493_+_5p_0
prediction_14_22049279_22049352_+_5p_-2
prediction_1_136805425_136805497_+_5p_4
prediction_7_10120539_10120606_-_5p_2
prediction_8_35307724_35307794_-_5p_2
prediction_1_136805434_136805488_+_5p_-5
prediction_8_35307729_35307789_-_5p_-3
prediction_11_48896793_48896854_-_5p_-5
prediction_13_67880150_67880207_-_3p_0
prediction_17_29075915_29075971_-_5p_16
prediction_X_92143724_92143784_-_5p_-5
prediction_11_49786987_49787046_-_5p_-4
prediction_11_49786976_49787049_-_5p_-1
prediction_1_95087325_95087384_-_5p_-5
known_PN12_2
known_PN12_1
prediction_17_27406548_27406604_-_5p_-5
ENSSSCT00000020015_9_67814650_67814742_-_5p_1
known_ssc-let-7c_2
known_ssc-let-7c_1
eca-mir-220b-2_7_2810099_2810181_-_5p_16
prediction_12_23210193_23210266_-_5p_16
prediction_12_23210197_23210266_-_5p_16
prediction_12_23210196_23210263_-_5p_13
hsa-mir-370_7_133847437_133847512_+_5p_-5
ENSSSCT00000020485_7_133847437_133847512_+_5p_-5
prediction_2_12972059_12972118_-_5p_16
prediction_3_105371909_105371975_-_5p_16
prediction_2_74255200_74255262_+_3p_-5
prediction_16_72991545_72991607_+_5p_10
prediction_2_68952152_68952215_+_5p_16
prediction_5_5766452_5766520_+_5p_-5
ENSSSCT00000020334_18_17167649_17167759_-_5p_-3
known_ssc-mir-30c-1_2
known_ssc-mir-30c-1_1
prediction_13_5574230_5574291_+_3p_16
prediction_6_43017882_43017950_+_5p_-4
prediction_7_104418347_104418417_+_5p_-2
prediction_12_51757557_51757621_+_5p_-5
prediction_7_104202020_104202090_-_5p_-2
prediction_1_76358043_76358113_+_5p_-2
prediction_15_73046967_73047039_-_5p_0
prediction_12_51757552_51757626_+_5p_0
prediction_7_16149596_16149664_-_5p_-4
prediction_1_76358046_76358110_+_5p_-5
prediction_15_73046970_73047036_-_5p_-3
prediction_15_99648154_99648216_-_5p_-3
prediction_8_8260170_8260225_+_5p_14
known_ssc-mir-216_1
known_ssc-mir-216_2
known_ssc-mir-27d_1
known_ssc-mir-27d_2
known_ssc-mir-330_1
known_ssc-mir-330_2
prediction_13_124857196_124857261_-_5p_-5
prediction_8_31598789_31598858_-_3p_-5
known_ssc-mir-143_1
known_ssc-mir-143_2
prediction_1_77625034_77625109_+_5p_-5
prediction_2_78200597_78200652_+_5p_-5
prediction_12_21412468_21412538_+_5p_12
known_ssc-mir-374a_1
known_ssc-mir-374a_2
ENSSSCT00000020352_4_5729445_5729548_+_5p_16
prediction_8_9745745_9745814_-_5p_-2
prediction_8_9745750_9745813_-_5p_-3
prediction_16_34897772_34897832_-_3p_1
ENSSSCT00000020719_17_40405237_40405340_-_5p_-1
bta-mir-499_17_40405237_40405340_-_5p_-1
prediction_5_23405047_23405118_+_3p_-5
prediction_5_23511368_23511440_+_3p_-5
prediction_3_21770037_21770099_+_5p_-5
prediction_9_59232436_59232492_+_3p_-5
prediction_8_117536848_117536905_-_5p_8
prediction_8_117536846_117536903_-_5p_6
prediction_8_34188286_34188348_+_3p_15
prediction_15_24459766_24459824_-_3p_13
ptr-mir-628_1_121208269_121208363_+_3p_3
ENSSSCT00000020401_1_121208269_121208364_+_3p_4
ENSSSCT00000020579_9_43358361_43358459_+_3p_1
known_ssc-mir-133a_2
known_ssc-mir-133a_1
ENSSSCT00000020794_9_13711338_13711447_-_5p_-5
known_ssc-mir-196b_1
known_ssc-mir-196b_2
prediction_5_93677146_93677203_+_5p_-5
prediction_5_93536362_93536419_+_5p_-5
prediction_11_20656842_20656910_+_5p_-5
prediction_2_45368971_45369032_-_5p_-5
prediction_6_58115097_58115157_+_3p_16
prediction_13_23642837_23642909_+_5p_-4
prediction_13_23726565_23726637_+_5p_-4
prediction_1_62777260_62777330_-_5p_-5
prediction_11_15568245_15568319_-_3p_6
prediction_11_15485581_15485655_-_3p_6
prediction_6_55912250_55912316_+_3p_-5
prediction_X_12823357_12823434_+_5p_-2
bta-mir-1343_2_24490870_24490948_-_5p_0
prediction_2_59627576_59627636_+_5p_-4
prediction_11_10552862_10552920_-_3p_5
prediction_3_13796510_13796578_+_5p_-5
prediction_11_49786985_49787044_-_5p_-5
prediction_3_99384375_99384446_+_3p_-5
bta-mir-499_17_40405237_40405340_-_3p_-5
hsa-mir-499_17_40405237_40405359_-_3p_-5
ENSSSCT00000020719_17_40405237_40405340_-_3p_-5
known_ssc-mir-181b-2_2
known_ssc-mir-181b-2_1
prediction_6_72818515_72818583_-_5p_-1
prediction_17_11433788_11433858_-_5p_-1
prediction_12_24235465_24235535_-_5p_1
prediction_17_11539461_11539531_+_5p_-1
ENSSSCT00000020718_14_90595793_90595888_-_5p_-4
ENSSSCT00000019864_14_90720819_90720914_-_5p_-4
known_ssc-mir-499_1
known_ssc-mir-499_2
prediction_8_34562385_34562444_+_3p_14
prediction_1_82766901_82766969_+_3p_-4
prediction_10_47302_47371_+_3p_16
prediction_13_145000878_145000938_-_3p_-2
prediction_2_120392163_120392222_-_3p_11
prediction_9_8305259_8305318_-_3p_11
ENSSSCT00000021582_14_51319103_51319197_-_5p_-5
bta-mir-301b_14_51319103_51319198_-_5p_-4
prediction_18_19087455_19087531_+_5p_1
prediction_18_19087458_19087528_+_5p_-2
prediction_18_19087461_19087525_+_5p_-5
ENSSSCT00000020476_18_5054286_5054404_-_5p_13
hsa-mir-671_18_5054286_5054404_-_5p_13
known_PN4_1
known_PN4_2
known_ssc-mir-9-1_1
known_ssc-mir-9-1_2
known_ssc-mir-9-2_2
known_ssc-mir-9-2_1
known_ssc-mir-9-3_2
known_ssc-mir-9-3_1
hsa-mir-335_18_16506697_16506791_-_3p_15
ENSSSCT00000021045_7_133834149_133834243_+_3p_-5
ggo-mir-205_9_126011573_126011683_-_3p_-2
ENSSSCT00000021275_X_108481525_108481622_-_3p_11
hsa-mir-542_X_108481525_108481622_-_3p_11
known_ssc-let-7f_2
known_ssc-let-7f_1
known_ssc-mir-107_1
known_ssc-mir-107_2
prediction_6_76723583_76723659_+_5p_16
prediction_14_99928815_99928881_-_3p_-5
prediction_5_24024533_24024591_-_3p_12
prediction_1_266006296_266006360_+_3p_-5
ENSSSCT00000020678_2_331298_331396_+_3p_-1
hsa-mir-210_2_331287_331397_+_3p_0
ENSSSCT00000019822_1_147227351_147227497_-_3p_4
prediction_14_61832252_61832319_+_3p_11
prediction_14_61832258_61832313_+_3p_5
prediction_1_270536219_270536281_-_3p_-5
ENSSSCT00000020741_6_45615061_45615125_+_3p_16
prediction_10_31341689_31341753_+_5p_3
prediction_14_116064495_116064567_+_5p_3
prediction_14_116064500_116064562_+_5p_-2
prediction_9_43285089_43285154_-_5p_-4
prediction_14_35753233_35753295_+_3p_9
prediction_14_20082091_20082160_-_3p_-5
known_ssc-let-7k_2
known_ssc-let-7k_1
prediction_9_4004042_4004108_+_3p_-5
prediction_16_72466390_72466457_+_5p_-5
prediction_17_47728369_47728442_+_3p_16
prediction_10_1461106_1461164_+_5p_16
ENSSSCT00000021054_1_227255281_227255372_-_3p_3
mmu-mir-101b_1_227255281_227255378_-_3p_3
prediction_8_26929233_26929299_-_5p_-5
prediction_14_117658500_117658557_-_3p_16
prediction_14_117870616_117870673_-_3p_16
prediction_12_34544867_34544940_+_5p_0
prediction_12_34668880_34668953_+_5p_0
prediction_5_70495854_70495923_-_5p_-5
prediction_12_34544873_34544934_-_5p_-5
prediction_12_34668886_34668947_-_5p_-5
prediction_1_83478103_83478171_+_5p_-2
prediction_6_23773308_23773375_+_5p_-5
prediction_9_62758175_62758242_+_5p_-5
prediction_2_91596372_91596450_+_5p_-2
prediction_14_21804679_21804751_-_5p_4
prediction_X_99152804_99152875_-_5p_-1
prediction_2_90416879_90416948_+_5p_-2
prediction_1_83478106_83478168_+_5p_-5
prediction_2_90416879_90416946_+_5p_-2
prediction_14_21804681_21804753_-_5p_6
prediction_7_80897884_80897957_-_5p_-1
prediction_X_99152807_99152872_-_5p_-4
prediction_7_70873149_70873215_+_5p_-5
prediction_6_23773305_23773378_+_5p_-2
prediction_3_10575880_10575953_-_5p_2
prediction_3_10575886_10575947_-_5p_-4
prediction_7_70873146_70873218_+_5p_-2
prediction_13_121414942_121415016_-_5p_0
prediction_2_90416882_90416945_+_5p_-5
prediction_13_104798802_104798869_-_5p_-4
prediction_3_104971545_104971609_-_3p_-5
prediction_7_45621881_45621949_+_5p_-5
known_ssc-mir-18a_2
known_ssc-mir-18a_1
prediction_7_103260959_103261019_+_3p_-5
known_ssc-mir-320c_2
known_ssc-mir-320c_1
ENSSSCT00000019711_15_73700020_73700104_-_5p_16
prediction_1_8796468_8796529_-_5p_-4
prediction_1_8796460_8796529_-_5p_-4
prediction_13_68547660_68547726_+_5p_1
prediction_6_52132126_52132197_-_5p_-1
known_ssc-mir-1-2_2
known_ssc-mir-1-2_1
prediction_1_225594563_225594623_-_5p_6
prediction_5_79878316_79878380_+_5p_-2
prediction_8_8260170_8260225_+_3p_16
prediction_4_21445610_21445679_-_5p_16
prediction_6_22502695_22502753_+_3p_15
prediction_2_51459799_51459862_-_3p_-5
prediction_4_122479288_122479354_+_5p_-5
prediction_X_121322517_121322575_+_3p_-4
prediction_8_109002383_109002443_-_3p_9
prediction_4_15864993_15865053_-_5p_-5
prediction_17_29073838_29073895_-_3p_-3
prediction_1_290036466_290036534_-_5p_-5
prediction_12_35219855_35219917_+_3p_-5
prediction_10_14028189_14028255_-_3p_-5
oan-mir-129_18_18269468_18269596_+_3p_0
prediction_14_110219096_110219158_-_5p_-5
prediction_14_71887759_71887817_+_5p_15
prediction_14_71958331_71958389_-_5p_15
ENSSSCT00000021191_X_99701473_99701562_+_5p_15
hsa-mir-504_X_111416457_111416540_+_5p_-5
ENSSSCT00000021518_X_111416457_111416540_+_5p_-5
prediction_17_11100805_11100872_-_5p_0
prediction_17_11100800_11100873_-_5p_1
prediction_15_9728621_9728682_-_5p_-1
gga-mir-22_12_45319032_45319129_+_3p_16
prediction_13_32714106_32714163_-_5p_-3
prediction_11_20656838_20656912_-_3p_14
prediction_3_92924250_92924314_+_5p_-5
known_ssc-mir-10a_2
known_ssc-mir-10a_1
prediction_17_8679168_8679226_-_3p_4
prediction_17_8679166_8679224_-_3p_6
prediction_6_22818982_22819040_+_3p_-5
prediction_10_7083118_7083176_+_5p_-5
eca-mir-551a_6_43640522_43640584_-_5p_1
mdo-mir-551a_6_43640507_43640590_-_5p_7
known_ssc-mir-141_2
known_ssc-mir-141_1
prediction_5_1615641_1615710_-_5p_0
prediction_17_14971838_14971897_+_3p_-5
prediction_1_174861120_174861178_+_5p_8
prediction_2_63592179_63592232_+_3p_-2
prediction_13_73713407_73713482_+_3p_-5
prediction_6_100309961_100310020_-_3p_-5
prediction_14_141839457_141839534_-_5p_-4
prediction_X_12111301_12111375_+_5p_-5
prediction_1_287606164_287606239_-_5p_-4
prediction_9_7042621_7042681_-_3p_-5
ggo-mir-124a_4_72452795_72452904_-_3p_16
ENSSSCT00000021100_4_72452796_72452901_-_3p_15
prediction_7_91732076_91732132_+_5p_-5
prediction_15_123923041_123923099_+_5p_16
prediction_2_115494604_115494673_-_3p_4
ENSSSCT00000019993_7_133928634_133928758_+_3p_1
bta-mir-220b_1_294347799_294347910_+_3p_16
ENSSSCT00000020283_1_294347799_294347910_+_3p_16
prediction_16_471636_471701_-_3p_10
prediction_8_29373598_29373658_-_5p_-5
prediction_4_135179770_135179837_+_5p_-2
known_ssc-mir-18b_1
known_ssc-mir-18b_2
ENSSSCT00000021077_14_32031344_32031452_+_5p_16
prediction_7_56020910_56020968_+_5p_-5
known_ssc-mir-23a_1
known_ssc-mir-23a_2
prediction_6_47168089_47168159_-_5p_-3
hsa-mir-454_12_33457312_33457427_-_3p_11
prediction_2_105059892_105059956_+_5p_-5
prediction_2_105059889_105059959_+_5p_-2
prediction_2_105059090_105059154_+_5p_-5
prediction_2_105059087_105059157_+_5p_-2
prediction_14_60186737_60186809_+_5p_-5
prediction_9_101707005_101707068_-_5p_-4
prediction_9_101707007_101707070_-_5p_-2
prediction_14_100224204_100224268_-_5p_0
prediction_1_136805425_136805497_+_5p_5
prediction_6_31783506_31783570_-_5p_-2
prediction_1_136805434_136805488_+_5p_-4
prediction_1_136805429_136805493_+_5p_1
prediction_6_116937926_116937990_-_3p_-5
prediction_6_9699163_9699228_+_3p_-2
prediction_4_64245379_64245443_-_3p_-4
ENSSSCT00000021196_8_71075759_71075854_-_5p_-5
known_ssc-mir-27a_1
known_ssc-mir-27a_2
prediction_7_103260951_103261025_+_3p_-5
prediction_7_103260953_103261025_+_3p_-5
prediction_1_9257824_9257888_-_5p_-5
ptr-mir-125a_6_39533847_39533932_+_3p_12
ENSSSCT00000020936_6_39533860_39533920_+_3p_0
prediction_11_31094300_31094365_+_3p_-5
known_PN11_1
known_PN11_2
known_ssc-let-7h_1
known_ssc-let-7h_2
prediction_14_51473985_51474046_-_3p_-4
ENSSSCT00000019986_14_80673633_80673715_+_3p_-1
prediction_4_105822278_105822341_+_5p_-4
ENSSSCT00000020047_13_28964465_28964555_+_3p_-3
bta-mir-135a-1_13_28964465_28964555_+_3p_-3
prediction_4_23997874_23997939_-_3p_-1
prediction_X_97695574_97695638_-_5p_-5
prediction_X_97695571_97695641_-_5p_-2
prediction_X_97695569_97695639_-_5p_-4
prediction_14_92906399_92906459_-_3p_4
prediction_14_92906394_92906464_-_3p_9
prediction_7_36940775_36940840_-_5p_-4
prediction_1_93701054_93701120_+_5p_-5
prediction_6_57577173_57577243_+_5p_-5
prediction_1_32826078_32826140_-_3p_-4
prediction_1_242876043_242876102_-_5p_-3
prediction_6_81969628_81969686_+_5p_0
known_ssc-mir-125b_2
known_ssc-mir-125b_1
prediction_1_45199813_45199882_-_3p_-2
prediction_1_45199812_45199871_-_3p_-1
prediction_1_45199814_45199873_-_3p_-3
prediction_4_112488430_112488489_+_3p_12
prediction_3_35368742_35368805_+_3p_-5
prediction_3_35095378_35095441_+_3p_-5
known_ssc-mir-411_1
known_ssc-mir-411_2
known_ssc-mir-20_2
known_ssc-mir-20_1
known_ssc-mir-487b_1
known_ssc-mir-487b_2
prediction_1_8796461_8796532_+_3p_-3
prediction_4_98498310_98498372_+_5p_-5
known_ssc-mir-197_2
known_ssc-mir-197_1
prediction_8_13375547_13375616_-_3p_16
prediction_2_74117797_74117857_-_3p_15
known_ssc-mir-130a_2
known_ssc-mir-130a_1
prediction_18_7775574_7775649_-_5p_-1
prediction_4_86748345_86748419_-_5p_0
prediction_4_86748346_86748418_-_5p_-1
prediction_7_49629581_49629652_+_5p_-5
prediction_4_86748348_86748416_-_5p_-3
prediction_14_22673716_22673777_+_3p_7
oan-mir-128-2_13_17766846_17766957_+_3p_-5
known_ssc-mir-592_2
known_ssc-mir-592_1
prediction_16_37791644_37791716_+_3p_-5
prediction_4_433654_433721_+_5p_-3
prediction_3_113574143_113574212_-_5p_-5
known_ssc-mir-99_2
known_ssc-mir-99_1
ENSSSCT00000020633_4_124680203_124680305_-_3p_6
prediction_13_85697061_85697122_+_5p_-5
known_ssc-mir-106_1
known_ssc-mir-106_2
prediction_18_7417127_7417193_-_5p_-1
prediction_14_32866526_32866594_-_5p_-5
prediction_7_10120542_10120603_-_3p_-5
prediction_2_104945625_104945696_+_5p_-5
prediction_4_49573115_49573184_-_5p_-5
known_ssc-mir-140*_2
known_ssc-mir-140*_1
prediction_13_119803135_119803201_+_5p_2
prediction_1_246861659_246861716_-_3p_-5
prediction_11_39393310_39393372_-_5p_-4
ENSSSCT00000019993_7_133928634_133928758_+_5p_2
oan-mir-208_7_82117406_82117517_-_3p_8
prediction_3_53860492_53860555_-_5p_-5
prediction_1_82766908_82766966_-_3p_-5
known_ssc-mir-204b_2
known_ssc-mir-204b_1
prediction_6_52024361_52024426_-_5p_-5
prediction_13_138885481_138885553_+_5p_-2
prediction_14_20829550_20829621_-_5p_-4
prediction_14_117100414_117100485_-_3p_13
known_ssc-mir-891b_2
known_ssc-mir-891b_1
prediction_11_77595699_77595763_-_3p_-3
known_PN10_1
known_PN10_2
prediction_10_14201589_14201655_-_5p_0
prediction_10_14492061_14492127_+_5p_-4
prediction_10_14492058_14492130_+_5p_-1
prediction_10_14201587_14201653_-_5p_-2
prediction_10_14201584_14201656_-_5p_1
prediction_14_74108455_74108526_-_5p_7
prediction_14_74108461_74108528_-_5p_9
known_ssc-mir-148a_1
known_ssc-mir-148a_2
prediction_4_96747055_96747119_-_3p_15
prediction_2_91629223_91629278_+_3p_13
known_ssc-mir-739_1
known_ssc-mir-739_2
prediction_5_91342599_91342669_-_3p_-4
prediction_5_56966476_56966540_+_3p_-3
prediction_5_56966474_56966540_+_3p_-3
prediction_1_60041454_60041518_+_5p_-5
known_ssc-mir-146a_2
known_ssc-mir-146a_1
mmu-mir-2146_6_250359_250413_-_3p_-5
prediction_1_69830707_69830770_-_5p_-5
cfa-mir-454_12_33457337_33457407_-_3p_-5
ENSSSCT00000020515_12_33457337_33457407_-_3p_-5
oan-mir-183_18_17172201_17172332_-_5p_-5
prediction_9_70638416_70638474_+_5p_16
prediction_7_83078911_83078976_+_5p_-3
mmu-mir-685_7_84990474_84990583_+_5p_13
prediction_6_116276_116346_+_3p_11
known_ssc-mir-221_2
known_ssc-mir-221_1
known_ssc-mir-21_2
known_ssc-mir-21_1
prediction_1_8650868_8650940_+_5p_-4
prediction_4_35175498_35175573_-_5p_-5
ENSSSCT00000021453_X_123383934_123384033_-_3p_-4
hsa-mir-1184_X_123383934_123384033_-_3p_-4
ENSSSCT00000020894_X_123637722_123637821_+_3p_-4
hsa-mir-1184_X_123637722_123637821_+_3p_-4
prediction_3_16736253_16736318_+_5p_-5
prediction_2_59020714_59020778_-_3p_-5
hsa-mir-671_18_5054286_5054404_-_3p_10
ENSSSCT00000020476_18_5054286_5054404_-_3p_10
prediction_6_120173944_120174005_+_3p_-5
known_ssc-mir-491_1
known_ssc-mir-491_2
prediction_6_58411266_58411337_-_5p_-3
prediction_13_121422758_121422817_-_5p_-3
prediction_13_121422750_121422826_-_5p_6
prediction_13_4470494_4470557_+_5p_6
prediction_5_47634415_47634485_-_5p_-4
prediction_1_137210662_137210741_-_5p_-1
ENSSSCT00000021196_8_71075759_71075854_-_5p_-4
bta-mir-135a-1_13_28964465_28964555_+_3p_-4
ENSSSCT00000020047_13_28964465_28964555_+_3p_-4
prediction_1_162553648_162553716_-_5p_-5
known_ssc-mir-138-1_2
known_ssc-mir-138-1_1
ENSSSCT00000019703_18_16054348_16054429_+_3p_-4
prediction_11_15371078_15371148_+_5p_7
known_ssc-mir-183_1
known_ssc-mir-183_2
prediction_6_82565847_82565915_-_5p_-4
prediction_14_74642364_74642424_-_5p_-5
prediction_9_104086319_104086383_+_5p_-2
known_ssc-mir-30c_2
known_ssc-mir-30c_1
prediction_13_62875726_62875790_-_5p_-3
prediction_7_98478008_98478085_-_5p_6
prediction_7_98478017_98478075_-_5p_-4
prediction_6_511127_511195_+_5p_-5
ENSSSCT00000021475_7_111513378_111513474_+_3p_-4
known_ssc-mir-23b_2
known_ssc-mir-23b_1
prediction_1_228235098_228235159_+_5p_-3
prediction_4_11115760_11115836_+_5p_16
prediction_17_54534514_54534574_-_3p_-5
prediction_17_54534512_54534572_-_3p_-3
prediction_8_71391839_71391905_+_5p_16
prediction_1_76814270_76814341_-_5p_-5
prediction_17_44473228_44473286_-_3p_-5
prediction_1_170436697_170436759_-_5p_16
prediction_1_26235160_26235219_+_3p_0
prediction_3_113610312_113610374_-_3p_-5
prediction_X_93093196_93093257_-_3p_-5
prediction_3_113610312_113610378_-_3p_-5
prediction_14_10005401_10005466_+_5p_-5
prediction_15_45424240_45424302_+_5p_-2
prediction_4_122479283_122479357_-_5p_-2
prediction_4_122479286_122479354_-_5p_-5
prediction_15_45424235_45424308_+_5p_3
bta-mir-181b-1_10_22839185_22839295_-_3p_4
mdo-mir-181b_10_22839185_22839272_-_3p_4
ENSSSCT00000020961_10_22839185_22839295_-_3p_4
prediction_6_56820716_56820784_-_3p_-5
prediction_6_24573357_24573422_-_3p_15
ENSSSCT00000020385_17_64053942_64054045_-_3p_13
ssc-mir-133a_17_64053942_64054045_-_3p_13
prediction_1_147052552_147052611_+_3p_-5
prediction_6_66625018_66625094_-_5p_15
prediction_15_123810260_123810325_-_3p_10
prediction_8_111997436_111997496_-_5p_-2
prediction_13_101923385_101923448_-_5p_-2
prediction_13_101923389_101923448_-_5p_-2
prediction_14_80989543_80989614_+_3p_-5
mmu-mir-2133-2_6_258601_258696_-_3p_14
known_ssc-mir-451_1
known_ssc-mir-451_2
ENSSSCT00000021054_1_227255281_227255372_-_3p_2
mmu-mir-101b_1_227255281_227255378_-_3p_2
prediction_15_14326287_14326343_+_5p_11
known_ssc-mir-455-3p_2
known_ssc-mir-455-3p_1
known_ssc-mir-105-1_2
known_ssc-mir-105-1_1
known_ssc-mir-105-2_1
known_ssc-mir-105-2_2
oan-mir-222a_X_40478816_40478928_-_5p_-4
ENSSSCT00000020092_X_40478821_40478931_-_5p_-1
prediction_2_51459801_51459868_+_3p_-5
ENSSSCT00000021088_6_121824296_121824388_-_3p_6
prediction_8_8260170_8260225_+_5p_15
prediction_15_14393606_14393670_-_3p_7
prediction_15_14393608_14393672_-_3p_5
prediction_7_3857768_3857832_-_5p_-4
ENSSSCT00000019988_10_36311907_36311988_-_3p_16
hsa-mir-876_10_36311907_36311988_-_3p_16
ENSSSCT00000021374_10_36141558_36141639_+_3p_16
prediction_10_61765139_61765213_-_5p_-5
prediction_1_243997243_243997312_+_5p_5
prediction_1_271942761_271942829_+_3p_9
prediction_1_242406078_242406145_-_5p_-5
prediction_X_97772949_97773005_+_3p_-5
ENSSSCT00000020454_12_20429360_20429438_-_3p_15
ENSSSCT00000020923_12_20259191_20259269_+_3p_15
prediction_18_47440864_47440937_+_3p_-5
prediction_5_49347852_49347925_-_3p_-5
hsa-mir-218-2_16_52396945_52397055_+_5p_-5
ENSSSCT00000019986_14_80673633_80673715_+_5p_16
prediction_3_94477472_94477543_+_3p_-5
prediction_14_73189093_73189161_+_5p_-5
prediction_8_97914138_97914194_+_5p_-4
prediction_12_51786723_51786786_-_3p_-4
known_ssc-mir-16c_2
known_ssc-mir-16c_1
prediction_13_40037950_40038026_-_3p_-5
prediction_5_59234307_59234371_+_5p_-5
prediction_1_75759797_75759867_+_5p_-5
prediction_12_34126013_34126084_-_5p_3
prediction_7_37733852_37733913_-_5p_16
prediction_7_74055795_74055865_+_3p_12
prediction_7_74055795_74055867_+_3p_14
bta-mir-885_13_55826398_55826472_-_5p_16
ENSSSCT00000020265_13_55826398_55826472_-_5p_16
known_ssc-mir-1a_2
known_ssc-mir-1a_1
prediction_14_62081641_62081708_-_3p_8
prediction_3_85635682_85635739_+_3p_-5
prediction_6_93665078_93665135_+_3p_10
prediction_2_37319061_37319125_-_5p_-2
prediction_15_5404212_5404287_-_5p_-4
prediction_7_66208782_66208841_-_3p_-5
ENSSSCT00000020673_6_37304643_37304736_+_3p_13
prediction_4_86524605_86524661_+_5p_-5
hsa-mir-181b-2_1_280335864_280335953_+_5p_16
ENSSSCT00000021314_1_280335864_280335953_+_5p_16
prediction_15_58768573_58768631_-_5p_-5
prediction_18_15370023_15370086_-_5p_2
ENSSSCT00000020348_9_126011587_126011656_-_3p_-3
known_ssc-mir-29b-2_2
known_ssc-mir-29b-2_1
prediction_7_86652673_86652733_-_3p_7
ENSSSCT00000020445_7_103329858_103329940_-_5p_-1
ptr-mir-497_12_49575599_49575668_+_3p_-5
ENSSSCT00000020236_12_49575599_49575668_+_3p_-5
ENSSSCT00000019778_17_61782653_61782764_-_3p_16
prediction_6_100396732_100396794_+_5p_-4
prediction_6_100396733_100396795_+_5p_-5
prediction_2_120465078_120465134_+_5p_10
ssc-mir-210_2_331305_331381_+_5p_9
ENSSSCT00000021593_1_91780483_91780555_+_3p_16
known_ssc-mir-652_1
known_ssc-mir-652_2
prediction_13_100293036_100293098_-_5p_-1
prediction_13_100293034_100293096_-_5p_-3
prediction_13_100213995_100214055_-_5p_-2
prediction_13_100293033_100293097_-_5p_-2
prediction_13_100213991_100214055_-_5p_-2
prediction_13_100213993_100214053_-_5p_-4
prediction_15_14393608_14393672_-_5p_-5
known_ssc-mir-363_1
known_ssc-mir-363_2
prediction_16_37962749_37962821_-_5p_9
prediction_16_37791644_37791716_+_5p_9
prediction_16_37791649_37791711_+_5p_4
prediction_16_37962754_37962816_-_5p_4
prediction_16_37962747_37962819_-_5p_7
prediction_3_53860495_53860556_-_5p_-5
ENSSSCT00000021368_9_101037307_101037391_+_3p_-1
prediction_13_73227672_73227745_-_5p_-4
prediction_7_37330452_37330517_-_5p_-2
prediction_4_98498304_98498378_+_5p_-5
prediction_6_87871756_87871826_-_5p_-2
prediction_8_37871241_37871311_-_5p_-2
prediction_15_45992399_45992475_-_5p_-5
prediction_7_14298404_14298465_-_5p_1
prediction_17_12008819_12008883_-_5p_0
prediction_2_133711862_133711927_-_5p_-5
prediction_8_38317938_38317999_+_5p_5
prediction_17_12008821_12008885_-_5p_2
prediction_15_45679740_45679807_-_5p_-4
prediction_X_81836311_81836381_+_5p_-5
prediction_9_70765244_70765309_+_5p_-5
prediction_10_48417118_48417191_+_5p_-5
prediction_5_12288232_12288309_+_5p_-5
prediction_7_105005742_105005801_-_5p_1
prediction_7_27114681_27114750_+_5p_-2
prediction_6_105029685_105029757_+_5p_-2
prediction_X_15459204_15459271_+_5p_1
prediction_9_69751221_69751290_+_5p_-5
prediction_7_26632744_26632813_-_5p_-1
prediction_15_45679746_45679809_-_5p_-2
prediction_5_20696811_20696888_+_5p_1
prediction_X_15459207_15459270_+_5p_-2
prediction_1_109857723_109857787_+_5p_-5
prediction_1_187974497_187974559_+_5p_-5
prediction_4_98498304_98498376_+_5p_-5
prediction_8_37871246_37871310_-_5p_-3
prediction_6_30405206_30405265_+_5p_-5
prediction_5_84517338_84517407_-_5p_-1
prediction_7_59621777_59621852_-_5p_-4
prediction_9_54986561_54986622_+_5p_-2
prediction_6_30405200_30405270_+_5p_1
prediction_9_72893455_72893520_+_5p_-5
prediction_2_66954087_66954151_+_5p_-5
prediction_14_112346226_112346296_+_5p_-5
prediction_7_105005739_105005804_-_5p_4
prediction_3_82798533_82798603_+_5p_-2
prediction_16_25243007_25243080_-_5p_1
prediction_18_47826973_47827040_+_5p_-5
prediction_5_70902726_70902789_-_5p_-1
prediction_6_105029688_105029754_+_5p_-5
prediction_15_124077856_124077932_+_5p_-2
prediction_7_26784706_26784775_-_5p_-1
prediction_3_50557350_50557416_-_5p_-2
prediction_9_41220956_41221028_+_5p_-5
prediction_5_46644860_46644933_+_5p_-2
prediction_18_10000358_10000429_+_5p_-2
prediction_3_94477472_94477543_+_5p_-5
prediction_2_133711858_133711931_-_5p_-1
prediction_4_36403060_36403128_+_5p_0
prediction_X_15459201_15459275_+_5p_4
prediction_5_12288232_12288307_+_5p_-5
prediction_6_867574_867647_-_5p_-1
prediction_6_87871758_87871828_-_5p_0
prediction_4_48988749_48988807_-_5p_-3
prediction_13_116731316_116731380_-_5p_-5
prediction_11_20232991_20233052_-_5p_-4
prediction_7_26784708_26784777_-_5p_1
prediction_4_64245379_64245443_-_5p_2
prediction_2_45132768_45132830_+_5p_5
prediction_8_33182072_33182138_-_5p_-3
prediction_4_36403060_36403126_+_5p_0
prediction_1_77625037_77625106_-_5p_-4
prediction_7_26632746_26632815_-_5p_1
prediction_14_93887691_93887761_+_5p_-2
prediction_1_109231798_109231861_+_5p_-5
prediction_1_134398487_134398542_+_5p_-5
prediction_6_29188464_29188533_+_5p_-5
prediction_3_13796506_13796582_+_5p_-2
prediction_3_13796506_13796580_+_5p_-2
prediction_8_27992845_27992908_+_5p_-2
prediction_2_37908303_37908366_-_5p_-4
prediction_17_35701572_35701645_+_5p_-2
prediction_14_93887694_93887760_+_5p_-5
prediction_4_64245377_64245441_-_5p_0
prediction_10_48417118_48417189_+_5p_-5
prediction_15_124188539_124188615_-_5p_0
prediction_2_45132768_45132829_+_5p_5
prediction_13_21447221_21447293_-_5p_-5
prediction_5_84517343_84517406_-_5p_-2
prediction_3_50557352_50557418_-_5p_0
prediction_16_25243014_25243077_-_5p_-2
mmu-mir-497_12_49575587_49575671_+_3p_-5
prediction_X_6178424_6178504_-_5p_-4
known_ssc-mir-136_1
known_ssc-mir-136_2
prediction_4_117964212_117964278_+_3p_1
prediction_10_32424164_32424229_+_5p_16
ENSSSCT00000020184_10_60644417_60644490_+_3p_16
prediction_4_131579571_131579634_-_3p_-4
known_ssc-mir-16b_2
known_ssc-mir-16b_1
prediction_1_100385836_100385893_+_3p_-5
prediction_5_14165694_14165760_+_5p_-5
prediction_17_12908247_12908324_+_3p_5
prediction_17_14131607_14131674_-_3p_-1
prediction_17_14131602_14131679_-_3p_4
prediction_17_12908250_12908319_+_3p_0
prediction_17_14131600_14131677_-_3p_6
prediction_1_99376426_99376497_-_5p_-4
prediction_1_99586097_99586168_-_5p_-4
prediction_14_38964301_38964366_-_5p_-5
prediction_3_23722597_23722673_+_5p_-5
prediction_14_38964297_38964370_-_5p_-1
prediction_18_51732532_51732595_+_3p_-5
known_ssc-mir-96_1
known_ssc-mir-96_2
prediction_3_74723736_74723808_+_5p_-5
prediction_15_100296540_100296609_+_5p_-5
prediction_15_100296540_100296607_+_5p_-5
known_ssc-mir-340_1
known_ssc-mir-340_2
known_ssc-mir-425_1
known_ssc-mir-425_2
prediction_1_47556758_47556825_+_3p_13
mml-mir-220a_2_50064122_50064233_-_3p_16
ENSSSCT00000020700_2_49930488_49930599_-_3p_16
ENSSSCT00000020796_2_50064122_50064233_-_3p_16
mml-mir-220a_2_49930488_49930599_-_3p_16
mml-mir-922_13_101111620_101111700_-_5p_-5
prediction_7_74474082_74474155_+_3p_16
known_ssc-mir-30e_1
known_ssc-mir-30e_2
prediction_8_116722771_116722839_-_5p_1
known_ssc-mir-124_1
known_ssc-mir-124_2
known_ssc-let-7j_2
known_ssc-let-7j_1
prediction_X_117042413_117042478_+_5p_9
prediction_6_11759823_11759891_+_5p_-4
prediction_8_95578421_95578481_+_3p_9
known_ssc-mir-302a*_1
known_ssc-mir-302a*_2
prediction_17_63460117_63460177_+_5p_-5
prediction_1_95733446_95733501_+_3p_12
prediction_3_41976644_41976703_+_3p_-5
prediction_16_52724623_52724681_-_5p_-3
prediction_4_99659144_99659209_-_3p_-5
prediction_2_76634212_76634269_-_5p_10
prediction_6_76724242_76724304_+_5p_-5
oan-mir-22_12_45319017_45319139_+_3p_-5
known_ssc-mir-22_1
known_ssc-mir-22_2
prediction_16_6289425_6289489_+_3p_-2
prediction_3_88105793_88105852_+_3p_-2
ENSSSCT00000021494_3_116622940_116623052_-_3p_8
prediction_3_82798530_82798600_-_5p_-4
prediction_3_82798532_82798602_-_5p_-2
mdo-mir-739_6_250391_250483_-_3p_9
ENSSSCT00000021554_X_17888883_17888983_+_3p_2
prediction_10_17354091_17354160_-_5p_5
prediction_10_17354089_17354158_-_5p_3
known_PN8_1
known_PN8_2
prediction_6_38746993_38747056_+_5p_16
prediction_6_38856812_38856875_+_5p_16
prediction_8_867083_867151_-_3p_-5
prediction_5_45031847_45031911_+_3p_16
known_PN3_2
known_PN3_1
prediction_14_5590438_5590495_+_3p_6
ENSSSCT00000020357_18_17171978_17172083_-_5p_-3
bta-mir-96_18_17171981_17172083_-_5p_-3
ENSSSCT00000021537_15_77060695_77060796_+_5p_16
prediction_9_44577273_44577333_+_3p_-4
bta-mir-2447_8_116445133_116445209_+_3p_4
known_ssc-mir-1297_2
known_ssc-mir-1297_1
prediction_1_165028452_165028513_-_3p_-4
prediction_18_53313483_53313543_+_5p_16
known_ssc-mir-196_2
known_ssc-mir-196_1
known_ssc-mir-196a-1_2
known_ssc-mir-196a-1_1
prediction_6_121755223_121755295_+_3p_16
prediction_X_76716753_76716813_-_5p_-5
prediction_X_29443063_29443131_-_3p_-4
prediction_4_121696197_121696260_-_5p_-3
known_ssc-mir-331_1
known_ssc-mir-331_2
prediction_3_113859688_113859753_+_5p_-5
prediction_1_283871940_283872004_-_5p_-3
known_PN9_1
known_PN9_2
prediction_6_122520652_122520717_-_5p_-5
known_ssc-mir-129_1
known_ssc-mir-129_2
prediction_3_12550610_12550675_-_3p_-5
prediction_8_76593438_76593497_+_3p_-4
prediction_14_35484155_35484220_+_5p_0
known_ssc-mir-455_1
known_ssc-mir-455_2
mmu-mir-2143-2_6_251367_251451_-_3p_-5
prediction_3_6920407_6920472_+_3p_-5
prediction_3_6920405_6920472_+_3p_-5
prediction_8_64120842_64120903_-_5p_-1
prediction_8_64120846_64120907_-_5p_3
prediction_14_44864855_44864933_+_3p_14
prediction_14_44864865_44864923_+_3p_4
prediction_4_19508602_19508665_-_3p_-5
known_ssc-mir-186_1
known_ssc-mir-186_2
prediction_18_9350766_9350833_-_5p_-4
prediction_1_284977794_284977864_-_5p_-3
prediction_3_104240453_104240519_-_5p_-5
known_ssc-mir-146b_1
known_ssc-mir-146b_2
ENSSSCT00000021196_8_71075759_71075854_-_3p_-5
known_ssc-mir-93b_1
known_ssc-mir-93b_2
prediction_15_56124411_56124485_+_5p_-5
ENSSSCT00000020440_17_59149581_59149648_+_5p_14
prediction_14_88964154_88964227_+_5p_-4
prediction_14_88853182_88853255_+_5p_-4
prediction_7_3124652_3124709_+_3p_16
prediction_2_37319059_37319127_-_3p_-5
known_ssc-mir-320b_2
known_ssc-mir-320b_1
prediction_14_25704856_25704915_+_3p_-5
known_ssc-mir-137_1
known_ssc-mir-137_2
known_ssc-mir-1b_1
known_ssc-mir-1b_2
prediction_3_73680577_73680638_-_3p_0
prediction_8_107374693_107374759_-_3p_-4
prediction_10_22092437_22092504_-_5p_5
prediction_12_15254010_15254071_-_5p_-4
prediction_14_109056879_109056949_+_5p_-5
prediction_15_77775900_77775971_+_5p_9
prediction_15_77961173_77961244_+_5p_9
prediction_7_105053127_105053199_+_3p_-3
prediction_2_59627576_59627638_-_5p_-1
prediction_6_118815202_118815269_+_3p_-5
known_ssc-mir-503_1
known_ssc-mir-503_2
known_PN5_1
known_PN5_2
prediction_1_64953740_64953806_+_5p_9
mmu-mir-346_14_90720812_90720910_-_3p_8
ENSSSCT00000020718_14_90595793_90595888_-_3p_1
mml-mir-346_14_90720812_90720898_-_3p_8
mml-mir-346_14_90595786_90595872_-_3p_8
mmu-mir-346_14_90595786_90595884_-_3p_8
ENSSSCT00000019864_14_90720819_90720914_-_3p_1
prediction_8_21385607_21385668_+_5p_10
prediction_15_62759434_62759489_-_5p_0
prediction_1_184272404_184272462_+_5p_-5
prediction_3_103449730_103449794_+_3p_-5
prediction_3_66337042_66337118_+_5p_-2
prediction_5_70902726_70902789_+_5p_-2
prediction_5_70902720_70902795_+_5p_4
ENSSSCT00000020586_7_27028466_27028543_+_5p_16
ENSSSCT00000020457_7_26718972_26719049_-_5p_16
prediction_3_119194447_119194513_-_5p_6
prediction_3_119194443_119194509_-_5p_2
prediction_3_119194445_119194511_-_5p_4
known_ssc-mir-383_2
known_ssc-mir-383_1
prediction_11_79375634_79375705_-_5p_4
known_ssc-mir-25_2
known_ssc-mir-25_1
prediction_14_118462278_118462337_-_5p_2
prediction_14_127334429_127334487_+_5p_1
prediction_2_91004831_91004886_-_3p_9
prediction_2_27000219_27000297_-_5p_-5
prediction_13_55905076_55905137_-_3p_-5
known_ssc-mir-378_1
known_ssc-mir-378_2
prediction_13_138885481_138885553_+_5p_-1
prediction_13_138885485_138885547_+_5p_-5
prediction_2_4607438_4607507_-_5p_-5
prediction_X_39087432_39087503_-_5p_-5
prediction_1_188846967_188847033_+_3p_-5
known_ssc-mir-100_2
known_ssc-mir-100_1
known_ssc-mir-205_1
known_ssc-mir-205_2
known_ssc-mir-34b_2
known_ssc-mir-34b_1
prediction_X_8417205_8417269_+_3p_11
hsa-mir-664_10_9823254_9823337_-_5p_2
known_ssc-mir-376a-1_2
known_ssc-mir-376a-1_1
prediction_15_102137942_102138020_-_5p_-5
prediction_11_39393311_39393373_+_5p_-4
ENSSSCT00000020005_3_3313218_3313316_+_3p_16
known_ssc-mir-27c_2
known_ssc-mir-27c_1
prediction_10_34048188_34048252_+_3p_-5
prediction_11_17567598_17567660_+_3p_-5
prediction_6_76726857_76726924_-_3p_-5
prediction_10_44538817_44538893_-_5p_2
prediction_2_127228089_127228152_-_5p_-4
prediction_8_27582934_27582999_+_5p_-5
prediction_7_674874_674931_-_5p_-3
prediction_11_11522231_11522288_+_3p_5
known_ssc-mir-20a_1
known_ssc-mir-20a_2
prediction_2_6897261_6897324_-_5p_-4
prediction_2_6897256_6897329_-_5p_1
prediction_2_6897258_6897327_-_5p_-1
prediction_2_6897254_6897327_-_5p_-1
known_ssc-mir-32_2
known_ssc-mir-32_1
known_ssc-mir-16-1_1
known_ssc-mir-16-1_2
prediction_1_225594385_225594438_-_3p_-4
prediction_18_39523988_39524055_+_5p_-5
prediction_15_49169424_49169495_-_5p_16
known_ssc-mir-92a_1
known_ssc-mir-92a_2
prediction_13_68547660_68547726_+_5p_2
prediction_1_188619228_188619293_+_5p_-1
ENSSSCT00000020890_3_35683168_35683260_-_5p_16
fru-mir-181a-1_1_280334001_280334081_+_5p_13
mmu-mir-148a_18_45214533_45214632_-_3p_-3
known_ssc-mir-30d_1
known_ssc-mir-30d_2
prediction_15_68922333_68922399_-_5p_9
prediction_15_68801727_68801793_-_5p_9
prediction_11_15222415_15222487_-_5p_-2
known_ssc-mir-98_2
known_ssc-mir-98_1
prediction_4_5111467_5111531_-_5p_16
prediction_1_149834762_149834831_-_5p_-4
prediction_7_130127325_130127389_-_3p_-5
prediction_7_129910892_129910956_+_3p_-5
ENSSSCT00000021098_15_14550873_14550955_-_5p_-3
age-mir-128_15_14550873_14550955_-_5p_-3
prediction_5_3472467_3472536_-_3p_10
prediction_10_62946855_62946919_+_5p_12
prediction_9_22342004_22342065_+_5p_13
prediction_9_22221344_22221405_-_5p_14
known_ssc-mir-15a_1
known_ssc-mir-15a_2
ssc-mir-503_X_108498664_108498773_-_3p_-5
ENSSSCT00000020752_X_108498664_108498773_-_3p_-5
prediction_6_123153252_123153326_-_3p_-5
known_ssc-mir-194_1
known_ssc-mir-194_2
prediction_8_104609839_104609902_-_3p_-5
prediction_6_22502695_22502753_+_5p_13
known_ssc-mir-34a_1
known_ssc-mir-34a_2
prediction_5_56966476_56966540_+_5p_-5
prediction_9_7243715_7243773_-_5p_7
prediction_9_7243716_7243776_-_5p_10
prediction_9_7243709_7243779_-_5p_13
prediction_9_7243712_7243780_-_5p_14
prediction_6_76724242_76724304_+_5p_4
hsa-mir-220b_2_49930500_49930587_-_3p_6
hsa-mir-220b_2_50064134_50064221_-_3p_6
prediction_3_40019637_40019698_+_5p_-5
prediction_7_127132499_127132568_-_3p_2
prediction_15_45424241_45424303_-_5p_0
prediction_15_45424243_45424305_-_5p_2
prediction_7_52007538_52007603_+_5p_-5
prediction_7_66764852_66764919_+_5p_-3
prediction_7_66651551_66651618_-_5p_-2
prediction_7_66651553_66651620_-_5p_0
ENSSSCT00000021548_14_64972230_64972305_+_3p_16
ENSSSCT00000021051_10_26149017_26149077_-_3p_1
bta-mir-23b_10_26149017_26149077_-_3p_1
prediction_15_49169424_49169495_-_5p_15
prediction_15_124077856_124077932_+_3p_14
prediction_15_124188539_124188615_-_3p_12
prediction_14_74108461_74108528_-_5p_6
prediction_14_74108455_74108526_-_5p_4
ENSSSCT00000021188_X_50243070_50243156_+_5p_-5
hsa-mir-1468_X_50243070_50243156_+_5p_-5
ENSSSCT00000020761_X_86350516_86350575_-_3p_16
ENSSSCT00000020064_X_86097370_86097429_+_3p_16
known_ssc-mir-181c_1
known_ssc-mir-181c_2
known_PN1_1
known_PN1_2
prediction_4_95182368_95182431_+_3p_15
known_ssc-mir-31_1
known_ssc-mir-31_2
prediction_2_63454832_63454895_+_5p_6
prediction_7_80136422_80136476_-_3p_10
prediction_14_63052265_63052339_-_5p_-5
prediction_1_39058214_39058275_-_3p_6
known_ssc-mir-125c_2
known_ssc-mir-125c_1
prediction_1_282328075_282328150_+_5p_-5
prediction_1_91757769_91757829_+_5p_-5
prediction_5_15078600_15078662_+_5p_-5
ENSSSCT00000020382_4_97900883_97900965_-_3p_4
prediction_1_9257824_9257888_-_3p_2
prediction_4_29510702_29510761_-_5p_13
prediction_4_29510700_29510759_-_5p_11
prediction_10_8203263_8203322_+_5p_16
prediction_8_107374691_107374757_-_3p_-4
known_ssc-mir-106a_2
known_ssc-mir-106a_1
known_ssc-mir-219-2_1
known_ssc-mir-219-2_2
prediction_3_103449731_103449795_-_5p_-5
prediction_2_20713887_20713938_-_5p_-3
prediction_9_128315695_128315756_-_3p_-5
prediction_2_120392163_120392222_-_5p_4
prediction_4_79892330_79892395_+_5p_16
prediction_6_82637033_82637086_+_5p_-5
ENSSSCT00000021314_1_280335864_280335953_+_5p_15
prediction_1_264426865_264426927_-_3p_-5
prediction_4_95182368_95182431_+_3p_16
prediction_8_27843808_27843877_-_3p_-3
prediction_8_27843809_27843880_-_3p_-4
known_ssc-mir-133a-1_2
known_ssc-mir-133a-1_1
prediction_1_69830707_69830770_-_3p_-5
prediction_6_47168089_47168155_+_3p_14
ENSSSCT00000019919_9_47573177_47573238_-_5p_-2
eca-mir-125b_9_47654244_47654332_-_5p_12
eca-mir-125b_9_47573164_47573252_-_5p_12
hsa-mir-302c_8_92257532_92257600_+_5p_1
ENSSSCT00000021153_8_92257532_92257600_+_5p_1
prediction_13_40456713_40456783_+_5p_-4
ENSSSCT00000021610_10_9750910_9750994_-_5p_12
prediction_6_47168088_47168158_+_3p_16
prediction_4_41959957_41960029_+_5p_16
prediction_5_1615642_1615709_+_3p_-3
prediction_8_108430837_108430911_+_5p_-5
prediction_3_71040117_71040182_-_5p_-4
prediction_16_68622284_68622346_-_5p_9
prediction_1_144986546_144986612_+_5p_8
prediction_1_144986548_144986608_+_5p_6
known_ssc-mir-217_1
known_ssc-mir-217_2

## Sheet: Table D 5'-end Significance 65%
Table S3. Responding probes in the experiments for the identification of the 5'-end of miRNAs
miRNA Name_Chromosome_Start-pre-miRNA_Stop-pre-miRNA_Strand_Arm-of-the-pre-miRNA_Probe-shift
ENSSSCT00000019703_18_16054348_16054429_+_3p_3
ENSSSCT00000019703_18_16054348_16054429_+_3p_4
ENSSSCT00000019711_15_73700020_73700104_-_5p_8
ENSSSCT00000019754_13_101111622_101111699_-_5p_2
ENSSSCT00000019778_17_61782653_61782764_-_3p_14
ENSSSCT00000019864_14_90720819_90720914_-_3p_-3
ENSSSCT00000019864_14_90720819_90720914_-_3p_7
ENSSSCT00000019864_14_90720819_90720914_-_5p_-1
ENSSSCT00000019864_14_90720819_90720914_-_5p_-2
ENSSSCT00000019942_13_26180000_26180077_-_5p_13
ENSSSCT00000019954_X_58683803_58683888_+_3p_6
ENSSSCT00000019954_X_58683803_58683888_+_3p_7
ENSSSCT00000019954_X_58683803_58683888_+_3p_8
ENSSSCT00000019965_14_69493245_69493336_-_3p_11
ENSSSCT00000019965_14_69493245_69493336_-_3p_8
ENSSSCT00000019986_14_80673633_80673715_+_3p_-1
ENSSSCT00000019986_14_80673633_80673715_+_5p_11
ENSSSCT00000019988_10_36311907_36311988_-_3p_13
ENSSSCT00000019988_10_36311907_36311988_-_3p_14
ENSSSCT00000019988_10_36311907_36311988_-_3p_16
ENSSSCT00000019993_7_133928634_133928758_+_3p_2
ENSSSCT00000019993_7_133928634_133928758_+_5p_-3
ENSSSCT00000020005_3_3313218_3313316_+_3p_8
ENSSSCT00000020014_7_133834347_133834429_+_5p_11
ENSSSCT00000020014_7_133834347_133834429_+_5p_12
ENSSSCT00000020015_9_67814650_67814742_-_5p_0
ENSSSCT00000020039_8_92258011_92258079_+_3p_-5
ENSSSCT00000020064_X_86097370_86097429_+_3p_14
ENSSSCT00000020082_7_120781195_120781252_+_3p_12
ENSSSCT00000020092_X_40478821_40478931_-_5p_0
ENSSSCT00000020122_7_129353742_129353824_+_5p_7
ENSSSCT00000020150_12_34201564_34201656_+_5p_16
ENSSSCT00000020184_10_60644417_60644490_+_3p_15
ENSSSCT00000020184_10_60644417_60644490_+_3p_16
ENSSSCT00000020221_4_99584644_99584723_+_5p_-5
ENSSSCT00000020236_12_49575599_49575668_+_3p_-3
ENSSSCT00000020236_12_49575599_49575668_+_3p_-4
ENSSSCT00000020265_13_55826398_55826472_-_5p_14
ENSSSCT00000020265_13_55826398_55826472_-_5p_15
ENSSSCT00000020265_13_55826398_55826472_-_5p_16
ENSSSCT00000020283_1_294347799_294347910_+_3p_10
ENSSSCT00000020289_15_130584584_130584725_+_5p_-5
ENSSSCT00000020296_2_136265608_136265674_+_3p_1
ENSSSCT00000020296_2_136265608_136265674_+_3p_2
ENSSSCT00000020330_6_39533215_39533285_+_3p_0
ENSSSCT00000020334_18_17167649_17167759_-_5p_0
ENSSSCT00000020346_16_52377039_52377118_+_3p_-1
ENSSSCT00000020346_16_52377039_52377118_+_3p_3
ENSSSCT00000020348_9_126011587_126011656_-_3p_-4
ENSSSCT00000020348_9_126011587_126011656_-_5p_3
ENSSSCT00000020352_4_5729445_5729548_+_5p_15
ENSSSCT00000020352_4_5729445_5729548_+_5p_16
ENSSSCT00000020357_18_17171978_17172083_-_5p_-3
ENSSSCT00000020357_18_17171978_17172083_-_5p_-5
ENSSSCT00000020382_4_97900883_97900965_-_3p_11
ENSSSCT00000020382_4_97900883_97900965_-_3p_12
ENSSSCT00000020385_17_64053942_64054045_-_3p_15
ENSSSCT00000020385_17_64053942_64054045_-_3p_16
ENSSSCT00000020401_1_121208269_121208364_+_3p_-2
ENSSSCT00000020409_5_29963949_29964040_+_5p_12
ENSSSCT00000020411_4_127718030_127718147_-_3p_9
ENSSSCT00000020440_17_59149581_59149648_+_5p_15
ENSSSCT00000020440_17_59149581_59149648_+_5p_16
ENSSSCT00000020445_7_103329858_103329940_-_5p_5
ENSSSCT00000020454_12_20429360_20429438_-_3p_9
ENSSSCT00000020457_7_26718972_26719049_-_5p_15
ENSSSCT00000020457_7_26718972_26719049_-_5p_16
ENSSSCT00000020476_18_5054286_5054404_-_3p_16
ENSSSCT00000020476_18_5054286_5054404_-_5p_16
ENSSSCT00000020485_7_133847437_133847512_+_3p_10
ENSSSCT00000020485_7_133847437_133847512_+_3p_8
ENSSSCT00000020485_7_133847437_133847512_+_5p_-4
ENSSSCT00000020502_9_6808358_6808426_-_3p_16
ENSSSCT00000020502_9_6808358_6808426_-_3p_9
ENSSSCT00000020515_12_33457337_33457407_-_3p_3
ENSSSCT00000020560_6_36259082_36259200_-_3p_15
ENSSSCT00000020578_6_40293229_40293320_+_5p_10
ENSSSCT00000020579_9_43358361_43358459_+_3p_3
ENSSSCT00000020579_9_43358361_43358459_+_3p_6
ENSSSCT00000020586_7_27028466_27028543_+_5p_15
ENSSSCT00000020586_7_27028466_27028543_+_5p_16
ENSSSCT00000020633_4_124680203_124680305_-_3p_-1
ENSSSCT00000020673_6_37304643_37304736_+_3p_13
ENSSSCT00000020673_6_37304643_37304736_+_3p_16
ENSSSCT00000020678_2_331298_331396_+_3p_-4
ENSSSCT00000020678_2_331298_331396_+_3p_-5
ENSSSCT00000020678_2_331298_331396_+_5p_-5
ENSSSCT00000020700_2_49930488_49930599_-_3p_14
ENSSSCT00000020706_6_83322545_83322654_-_5p_6
ENSSSCT00000020716_2_17100314_17100408_-_3p_11
ENSSSCT00000020716_2_17100314_17100408_-_3p_12
ENSSSCT00000020718_14_90595793_90595888_-_3p_-3
ENSSSCT00000020718_14_90595793_90595888_-_3p_7
ENSSSCT00000020718_14_90595793_90595888_-_5p_-1
ENSSSCT00000020718_14_90595793_90595888_-_5p_-2
ENSSSCT00000020719_17_40405237_40405340_-_3p_1
ENSSSCT00000020719_17_40405237_40405340_-_3p_2
ENSSSCT00000020719_17_40405237_40405340_-_5p_7
ENSSSCT00000020728_1_284963090_284963172_-_3p_-3
ENSSSCT00000020752_X_108498664_108498773_-_3p_-4
ENSSSCT00000020752_X_108498664_108498773_-_3p_-5
ENSSSCT00000020761_X_86350516_86350575_-_3p_14
ENSSSCT00000020794_9_13711338_13711447_-_5p_-2
ENSSSCT00000020796_2_50064122_50064233_-_3p_14
ENSSSCT00000020806_2_46561891_46561973_+_3p_5
ENSSSCT00000020806_2_46561891_46561973_+_3p_6
ENSSSCT00000020817_3_29678100_29678195_-_5p_2
ENSSSCT00000020817_3_29678100_29678195_-_5p_4
ENSSSCT00000020830_3_40637122_40637205_-_3p_-5
ENSSSCT00000020848_12_37773635_37773707_+_3p_-4
ENSSSCT00000020848_12_37773635_37773707_+_3p_-5
ENSSSCT00000020890_3_35683168_35683260_-_5p_16
ENSSSCT00000020894_X_123637722_123637821_+_3p_3
ENSSSCT00000020923_12_20259191_20259269_+_3p_9
ENSSSCT00000020936_6_39533860_39533920_+_3p_5
ENSSSCT00000020936_6_39533860_39533920_+_3p_6
ENSSSCT00000020961_10_22839185_22839295_-_3p_2
ENSSSCT00000020965_12_45599471_45599572_-_5p_-4
ENSSSCT00000020965_12_45599471_45599572_-_5p_-5
ENSSSCT00000021024_1_284509638_284509720_+_3p_-3
ENSSSCT00000021045_7_133834149_133834243_+_3p_-4
ENSSSCT00000021045_7_133834149_133834243_+_3p_3
ENSSSCT00000021054_1_227255281_227255372_-_3p_10
ENSSSCT00000021054_1_227255281_227255372_-_3p_11
ENSSSCT00000021077_14_32031344_32031452_+_5p_16
ENSSSCT00000021088_6_121824296_121824388_-_3p_12
ENSSSCT00000021088_6_121824296_121824388_-_5p_16
ENSSSCT00000021098_15_14550873_14550955_-_3p_-1
ENSSSCT00000021098_15_14550873_14550955_-_3p_-2
ENSSSCT00000021098_15_14550873_14550955_-_5p_3
ENSSSCT00000021100_4_72452796_72452901_-_3p_9
ENSSSCT00000021133_8_86931991_86932076_+_3p_16
ENSSSCT00000021144_1_210973874_210973958_-_5p_10
ENSSSCT00000021153_8_92257532_92257600_+_5p_-5
ENSSSCT00000021188_X_50243070_50243156_+_5p_2
ENSSSCT00000021188_X_50243070_50243156_+_5p_3
ENSSSCT00000021191_X_99701473_99701562_+_5p_12
ENSSSCT00000021196_8_71075759_71075854_-_3p_1
ENSSSCT00000021196_8_71075759_71075854_-_5p_4
ENSSSCT00000021200_1_267441301_267441374_-_3p_-1
ENSSSCT00000021201_5_29805694_29805785_+_5p_12
ENSSSCT00000021275_X_108481525_108481622_-_3p_16
ENSSSCT00000021279_14_52703711_52703787_+_3p_1
ENSSSCT00000021293_7_133923085_133923157_+_3p_14
ENSSSCT00000021346_3_40549758_40549841_-_3p_-5
ENSSSCT00000021374_10_36141558_36141639_+_3p_13
ENSSSCT00000021374_10_36141558_36141639_+_3p_14
ENSSSCT00000021441_X_121722372_121722453_+_5p_10
ENSSSCT00000021453_X_123383934_123384033_-_3p_3
ENSSSCT00000021468_4_97531325_97531414_+_5p_-5
ENSSSCT00000021470_4_97746790_97746879_-_5p_-5
ENSSSCT00000021475_7_111513378_111513474_+_3p_-4
ENSSSCT00000021475_7_111513378_111513474_+_3p_-5
ENSSSCT00000021491_12_45599921_45599983_-_3p_-4
ENSSSCT00000021491_12_45599921_45599983_-_3p_-5
ENSSSCT00000021494_3_116622940_116623052_-_3p_14
ENSSSCT00000021494_3_116622940_116623052_-_3p_15
ENSSSCT00000021494_3_116622940_116623052_-_3p_16
ENSSSCT00000021517_1_107486540_107486614_-_3p_16
ENSSSCT00000021518_X_111416457_111416540_+_5p_0
ENSSSCT00000021536_1_53848997_53849104_-_5p_15
ENSSSCT00000021536_1_53848997_53849104_-_5p_16
ENSSSCT00000021548_14_64972230_64972305_+_3p_14
ENSSSCT00000021548_14_64972230_64972305_+_3p_15
ENSSSCT00000021554_X_17888883_17888983_+_3p_-5
ENSSSCT00000021566_13_23336889_23336951_+_3p_-5
ENSSSCT00000021582_14_51319103_51319197_-_5p_-4
ENSSSCT00000021582_14_51319103_51319197_-_5p_-5
ENSSSCT00000021593_1_91780483_91780555_+_3p_16
age-mir-128_15_14550873_14550955_-_3p_-1
age-mir-128_15_14550873_14550955_-_3p_-2
age-mir-128_15_14550873_14550955_-_5p_3
bta-mir-129-2_2_17100314_17100408_-_3p_11
bta-mir-129-2_2_17100314_17100408_-_3p_12
bta-mir-1343_2_24490870_24490948_-_5p_-3
bta-mir-1343_2_24490870_24490948_-_5p_-4
bta-mir-138-1_13_23336869_23336966_+_3p_2
bta-mir-138-1_13_23336869_23336966_+_3p_3
bta-mir-181a-2_1_280333976_280334086_+_5p_2
bta-mir-181b-1_10_22839185_22839295_-_3p_2
bta-mir-212_12_45599903_45600014_-_3p_9
bta-mir-220b_1_294347799_294347910_+_3p_10
bta-mir-2411_4_99530700_99530777_-_3p_-4
bta-mir-2411_4_99530700_99530777_-_3p_-5
bta-mir-2447_8_116445133_116445209_+_3p_-2
bta-mir-2447_8_116445133_116445209_+_3p_-3
bta-mir-2447_8_116445133_116445209_+_3p_-4
bta-mir-2447_8_116445133_116445209_+_5p_-1
bta-mir-301b_14_51319103_51319198_-_5p_-4
bta-mir-301b_14_51319103_51319198_-_5p_-5
bta-mir-30b_4_5733577_5733665_+_3p_13
bta-mir-30b_4_5733577_5733665_+_3p_14
bta-mir-499_17_40405237_40405340_-_3p_1
bta-mir-499_17_40405237_40405340_-_3p_2
bta-mir-499_17_40405237_40405340_-_5p_7
bta-mir-760_4_127718030_127718147_-_3p_9
bta-mir-769_6_36259082_36259201_-_3p_15
bta-mir-885_13_55826398_55826472_-_5p_14
bta-mir-885_13_55826398_55826472_-_5p_16
bta-mir-96_18_17171981_17172083_-_5p_-3
bta-mir-96_18_17171981_17172083_-_5p_-5
cfa-mir-138a_13_23336889_23336951_+_3p_-5
cfa-mir-196b_18_44179804_44179862_+_3p_14
cfa-mir-196b_18_44205858_44205916_+_3p_14
cfa-mir-212_12_45599921_45599983_-_3p_-4
cfa-mir-212_12_45599921_45599983_-_3p_-5
cfa-mir-345_7_130435932_130435992_+_5p_13
cfa-mir-345_7_130435932_130435992_+_5p_15
cfa-mir-345_7_130622845_130622905_-_5p_13
cfa-mir-345_7_130622845_130622905_-_5p_15
cfa-mir-454_12_33457337_33457407_-_3p_3
cfa-mir-491_1_210973888_210973942_-_3p_-2
cfa-mir-491_1_210973888_210973942_-_3p_-3
eca-mir-1291b_5_75055818_75055874_+_3p_1
eca-mir-1905c_2_46561890_46561973_+_3p_5
eca-mir-1905c_2_46561890_46561973_+_3p_6
eca-mir-220b-2_6_171241_171323_-_3p_7
eca-mir-220b-2_7_2810099_2810181_-_5p_12
eca-mir-220b-2_7_2848581_2848663_-_5p_10
eca-mir-551a_6_43640522_43640584_-_5p_0
eca-mir-551a_6_43640522_43640584_-_5p_1
gga-mir-21_12_34201564_34201661_+_5p_16
gga-mir-22_12_45319032_45319129_+_3p_16
ggo-mir-105_X_121722372_121722453_+_5p_10
ggo-mir-124a_4_72452795_72452904_-_3p_10
ggo-mir-205_9_126011573_126011683_-_3p_-1
ggo-mir-219_7_29626545_29626655_+_3p_2
ggo-mir-219_7_29626545_29626655_+_3p_3
hsa-mir-1184_X_123383934_123384033_-_3p_3
hsa-mir-1184_X_123637722_123637821_+_3p_3
hsa-mir-1296_14_69493245_69493337_-_3p_11
hsa-mir-1296_14_69493245_69493337_-_3p_8
hsa-mir-132_12_45599471_45599572_-_5p_-4
hsa-mir-132_12_45599471_45599572_-_5p_-5
hsa-mir-1468_X_50243070_50243156_+_5p_2
hsa-mir-1468_X_50243070_50243156_+_5p_3
hsa-mir-185_14_52703707_52703789_+_3p_3
hsa-mir-190b_4_99584644_99584723_+_5p_-5
hsa-mir-193a_12_41119428_41119516_-_5p_7
hsa-mir-210_2_331287_331397_+_3p_-3
hsa-mir-210_2_331287_331397_+_3p_-4
hsa-mir-210_2_331287_331397_+_5p_0
hsa-mir-210_2_331287_331397_+_5p_1
hsa-mir-218-2_16_52396945_52397055_+_5p_3
hsa-mir-220b_2_49930500_49930587_-_3p_2
hsa-mir-220b_2_50064134_50064221_-_3p_2
hsa-mir-302c_8_92257532_92257600_+_5p_-5
hsa-mir-335_18_16506697_16506791_-_3p_10
hsa-mir-335_18_16506697_16506791_-_3p_8
hsa-mir-367_8_92258011_92258079_+_3p_-5
hsa-mir-370_7_133847437_133847512_+_3p_10
hsa-mir-370_7_133847437_133847512_+_3p_8
hsa-mir-370_7_133847437_133847512_+_5p_-4
hsa-mir-454_12_33457312_33457427_-_3p_10
hsa-mir-454_12_33457312_33457427_-_3p_3
hsa-mir-491_1_210973874_210973958_-_5p_10
hsa-mir-499_17_40405237_40405359_-_3p_1
hsa-mir-499_17_40405237_40405359_-_3p_2
hsa-mir-504_X_111416457_111416540_+_5p_0
hsa-mir-542_X_108481525_108481622_-_3p_16
hsa-mir-664_10_9823254_9823337_-_5p_8
hsa-mir-664_10_9823254_9823337_-_5p_9
hsa-mir-665_7_133923085_133923157_+_3p_14
hsa-mir-671_18_5054286_5054404_-_3p_16
hsa-mir-671_18_5054286_5054404_-_5p_16
hsa-mir-876_10_36311907_36311988_-_3p_13
hsa-mir-876_10_36311907_36311988_-_3p_14
hsa-mir-876_10_36311907_36311988_-_3p_16
hsa-mir-9-1_4_97531325_97531414_+_5p_-5
hsa-mir-9-1_4_97746790_97746879_-_5p_-5
hsa-mir-935_6_40351574_40351665_+_5p_10
hsa-mir-99b_6_39533215_39533285_+_3p_0
known_PN10_1
known_PN10_2
known_PN11_1
known_PN11_2
known_PN12_1
known_PN12_2
known_PN1_1
known_PN1_2
known_PN2_1
known_PN2_2
known_PN3_1
known_PN3_2
known_PN4_1
known_PN4_2
known_PN5_1
known_PN5_2
known_PN6_1
known_PN6_2
known_PN7_1
known_PN7_2
known_PN8_1
known_PN8_2
known_PN9_1
known_PN9_2
known_ssc-let-7a_1
known_ssc-let-7a_2
known_ssc-let-7b_1
known_ssc-let-7b_2
known_ssc-let-7c_1
known_ssc-let-7c_2
known_ssc-let-7d_1
known_ssc-let-7d_2
known_ssc-let-7e_1
known_ssc-let-7e_2
known_ssc-let-7f_1
known_ssc-let-7f_2
known_ssc-let-7g_1
known_ssc-let-7g_2
known_ssc-let-7h_1
known_ssc-let-7h_2
known_ssc-let-7i_1
known_ssc-let-7i_2
known_ssc-let-7j_1
known_ssc-let-7j_2
known_ssc-let-7k_1
known_ssc-let-7k_2
known_ssc-mir-1-2_1
known_ssc-mir-1-2_2
known_ssc-mir-100_1
known_ssc-mir-100_2
known_ssc-mir-101a_1
known_ssc-mir-101a_2
known_ssc-mir-101b_1
known_ssc-mir-101b_2
known_ssc-mir-103-2_1
known_ssc-mir-103-2_2
known_ssc-mir-103_1
known_ssc-mir-103_2
known_ssc-mir-105-1_1
known_ssc-mir-105-1_2
known_ssc-mir-105-2_1
known_ssc-mir-105-2_2
known_ssc-mir-106_1
known_ssc-mir-106_2
known_ssc-mir-106a_1
known_ssc-mir-106a_2
known_ssc-mir-106b_1
known_ssc-mir-106b_2
known_ssc-mir-107_1
known_ssc-mir-107_2
known_ssc-mir-10a_1
known_ssc-mir-10a_2
known_ssc-mir-10b_1
known_ssc-mir-10b_2
known_ssc-mir-1224-3p_1
known_ssc-mir-1224-3p_2
known_ssc-mir-122_1
known_ssc-mir-122_2
known_ssc-mir-122a_1
known_ssc-mir-122a_2
known_ssc-mir-124_1
known_ssc-mir-124_2
known_ssc-mir-124a-1_1
known_ssc-mir-124a-1_2
known_ssc-mir-124a-2_1
known_ssc-mir-124a-2_2
known_ssc-mir-124a-3_1
known_ssc-mir-124a-3_2
known_ssc-mir-124a_1
known_ssc-mir-124a_2
known_ssc-mir-125b-1_1
known_ssc-mir-125b-1_2
known_ssc-mir-125b_1
known_ssc-mir-125b_2
known_ssc-mir-125c_1
known_ssc-mir-125c_2
known_ssc-mir-126*_1
known_ssc-mir-126*_2
known_ssc-mir-126_1
known_ssc-mir-126_2
known_ssc-mir-128_1
known_ssc-mir-128_2
known_ssc-mir-128a_1
known_ssc-mir-128a_2
known_ssc-mir-1297_1
known_ssc-mir-1297_2
known_ssc-mir-129_1
known_ssc-mir-129_2
known_ssc-mir-130a_1
known_ssc-mir-130a_2
known_ssc-mir-130c_1
known_ssc-mir-130c_2
known_ssc-mir-133a-1_1
known_ssc-mir-133a-1_2
known_ssc-mir-133a_1
known_ssc-mir-133a_2
known_ssc-mir-133b_1
known_ssc-mir-133b_2
known_ssc-mir-133c_1
known_ssc-mir-133c_2
known_ssc-mir-133d_1
known_ssc-mir-133d_2
known_ssc-mir-135-1_1
known_ssc-mir-135-1_2
known_ssc-mir-135-2_1
known_ssc-mir-135-2_2
known_ssc-mir-136_1
known_ssc-mir-136_2
known_ssc-mir-137_1
known_ssc-mir-137_2
known_ssc-mir-138-1_1
known_ssc-mir-138-1_2
known_ssc-mir-138-2_1
known_ssc-mir-138-2_2
known_ssc-mir-139_1
known_ssc-mir-139_2
known_ssc-mir-140*_1
known_ssc-mir-140*_2
known_ssc-mir-140_1
known_ssc-mir-140_2
known_ssc-mir-141_1
known_ssc-mir-141_2
known_ssc-mir-142-3p_1
known_ssc-mir-142-3p_2
known_ssc-mir-142_1
known_ssc-mir-142_2
known_ssc-mir-142a_1
known_ssc-mir-142a_2
known_ssc-mir-143_1
known_ssc-mir-143_2
known_ssc-mir-144_1
known_ssc-mir-144_2
known_ssc-mir-145_1
known_ssc-mir-145_2
known_ssc-mir-146a_1
known_ssc-mir-146a_2
known_ssc-mir-146b_1
known_ssc-mir-146b_2
known_ssc-mir-148a_1
known_ssc-mir-148a_2
known_ssc-mir-152_1
known_ssc-mir-152_2
known_ssc-mir-153-1_1
known_ssc-mir-153-1_2
known_ssc-mir-153_1
known_ssc-mir-153_2
known_ssc-mir-155_1
known_ssc-mir-155_2
known_ssc-mir-15a_1
known_ssc-mir-15a_2
known_ssc-mir-15b_1
known_ssc-mir-15b_2
known_ssc-mir-15c_1
known_ssc-mir-15c_2
known_ssc-mir-16-1_1
known_ssc-mir-16-1_2
known_ssc-mir-16_1
known_ssc-mir-16_2
known_ssc-mir-16a_1
known_ssc-mir-16a_2
known_ssc-mir-16b_1
known_ssc-mir-16b_2
known_ssc-mir-16c_1
known_ssc-mir-16c_2
known_ssc-mir-17_1
known_ssc-mir-17_2
known_ssc-mir-181a_1
known_ssc-mir-181a_2
known_ssc-mir-181b-2_1
known_ssc-mir-181b-2_2
known_ssc-mir-181b_1
known_ssc-mir-181b_2
known_ssc-mir-181c_1
known_ssc-mir-181c_2
known_ssc-mir-182*_1
known_ssc-mir-182*_2
known_ssc-mir-183_1
known_ssc-mir-183_2
known_ssc-mir-184_1
known_ssc-mir-184_2
known_ssc-mir-185_1
known_ssc-mir-185_2
known_ssc-mir-186_1
known_ssc-mir-186_2
known_ssc-mir-18_1
known_ssc-mir-18_2
known_ssc-mir-18a_1
known_ssc-mir-18a_2
known_ssc-mir-18b_1
known_ssc-mir-18b_2
known_ssc-mir-190_1
known_ssc-mir-190_2
known_ssc-mir-191_1
known_ssc-mir-191_2
known_ssc-mir-192_1
known_ssc-mir-192_2
known_ssc-mir-194_1
known_ssc-mir-194_2
known_ssc-mir-196_1
known_ssc-mir-196_2
known_ssc-mir-196a-1_1
known_ssc-mir-196a-1_2
known_ssc-mir-196b_1
known_ssc-mir-196b_2
known_ssc-mir-197_1
known_ssc-mir-197_2
known_ssc-mir-199a_1
known_ssc-mir-199a_2
known_ssc-mir-199b*_1
known_ssc-mir-199b*_2
known_ssc-mir-199b_1
known_ssc-mir-199b_2
known_ssc-mir-19a_1
known_ssc-mir-19a_2
known_ssc-mir-19b-1_1
known_ssc-mir-19b-1_2
known_ssc-mir-1a_1
known_ssc-mir-1a_2
known_ssc-mir-1b_1
known_ssc-mir-1b_2
known_ssc-mir-1c_1
known_ssc-mir-1c_2
known_ssc-mir-200a_1
known_ssc-mir-200a_2
known_ssc-mir-204_1
known_ssc-mir-204_2
known_ssc-mir-204a_1
known_ssc-mir-204a_2
known_ssc-mir-204b_1
known_ssc-mir-204b_2
known_ssc-mir-205_1
known_ssc-mir-205_2
known_ssc-mir-208_1
known_ssc-mir-208_2
known_ssc-mir-20_1
known_ssc-mir-20_2
known_ssc-mir-20a_1
known_ssc-mir-20a_2
known_ssc-mir-20b_1
known_ssc-mir-20b_2
known_ssc-mir-210_1
known_ssc-mir-210_2
known_ssc-mir-211_1
known_ssc-mir-211_2
known_ssc-mir-214_1
known_ssc-mir-214_2
known_ssc-mir-215_1
known_ssc-mir-215_2
known_ssc-mir-216_1
known_ssc-mir-216_2
known_ssc-mir-217_1
known_ssc-mir-217_2
known_ssc-mir-219-2_1
known_ssc-mir-219-2_2
known_ssc-mir-21_1
known_ssc-mir-21_2
known_ssc-mir-221_1
known_ssc-mir-221_2
known_ssc-mir-224_1
known_ssc-mir-224_2
known_ssc-mir-22_1
known_ssc-mir-22_2
known_ssc-mir-22a_1
known_ssc-mir-22a_2
known_ssc-mir-22b_1
known_ssc-mir-22b_2
known_ssc-mir-23a_1
known_ssc-mir-23a_2
known_ssc-mir-23b_1
known_ssc-mir-23b_2
known_ssc-mir-24_1
known_ssc-mir-24_2
known_ssc-mir-24a_1
known_ssc-mir-24a_2
known_ssc-mir-24b_1
known_ssc-mir-24b_2
known_ssc-mir-25_1
known_ssc-mir-25_2
known_ssc-mir-26a_1
known_ssc-mir-26a_2
known_ssc-mir-26b_1
known_ssc-mir-26b_2
known_ssc-mir-27a_1
known_ssc-mir-27a_2
known_ssc-mir-27b_1
known_ssc-mir-27b_2
known_ssc-mir-27c_1
known_ssc-mir-27c_2
known_ssc-mir-27d_1
known_ssc-mir-27d_2
known_ssc-mir-27e_1
known_ssc-mir-27e_2
known_ssc-mir-29a_1
known_ssc-mir-29a_2
known_ssc-mir-29b-2_1
known_ssc-mir-29b-2_2
known_ssc-mir-29b_1
known_ssc-mir-29b_2
known_ssc-mir-29c_1
known_ssc-mir-29c_2
known_ssc-mir-302a*_1
known_ssc-mir-302a*_2
known_ssc-mir-302a_1
known_ssc-mir-302a_2
known_ssc-mir-30a_1
known_ssc-mir-30a_2
known_ssc-mir-30b_1
known_ssc-mir-30b_2
known_ssc-mir-30c-1_1
known_ssc-mir-30c-1_2
known_ssc-mir-30c_1
known_ssc-mir-30c_2
known_ssc-mir-30d_1
known_ssc-mir-30d_2
known_ssc-mir-30e_1
known_ssc-mir-30e_2
known_ssc-mir-31_1
known_ssc-mir-31_2
known_ssc-mir-320_1
known_ssc-mir-320_2
known_ssc-mir-320a_1
known_ssc-mir-320a_2
known_ssc-mir-320b_1
known_ssc-mir-320b_2
known_ssc-mir-320c_1
known_ssc-mir-320c_2
known_ssc-mir-320d_1
known_ssc-mir-320d_2
known_ssc-mir-323_1
known_ssc-mir-323_2
known_ssc-mir-324_1
known_ssc-mir-324_2
known_ssc-mir-326_1
known_ssc-mir-326_2
known_ssc-mir-32_1
known_ssc-mir-32_2
known_ssc-mir-330_1
known_ssc-mir-330_2
known_ssc-mir-331_1
known_ssc-mir-331_2
known_ssc-mir-340_1
known_ssc-mir-340_2
known_ssc-mir-34a_1
known_ssc-mir-34a_2
known_ssc-mir-34b_1
known_ssc-mir-34b_2
known_ssc-mir-352_1
known_ssc-mir-352_2
known_ssc-mir-363_1
known_ssc-mir-363_2
known_ssc-mir-365-1_1
known_ssc-mir-365-1_2
known_ssc-mir-365-2_1
known_ssc-mir-365-2_2
known_ssc-mir-374a_1
known_ssc-mir-374a_2
known_ssc-mir-375_1
known_ssc-mir-375_2
known_ssc-mir-376a-1_1
known_ssc-mir-376a-1_2
known_ssc-mir-378_1
known_ssc-mir-378_2
known_ssc-mir-382_1
known_ssc-mir-382_2
known_ssc-mir-383_1
known_ssc-mir-383_2
known_ssc-mir-411_1
known_ssc-mir-411_2
known_ssc-mir-423_1
known_ssc-mir-423_2
known_ssc-mir-425_1
known_ssc-mir-425_2
known_ssc-mir-450a_1
known_ssc-mir-450a_2
known_ssc-mir-451_1
known_ssc-mir-451_2
known_ssc-mir-455-3p_1
known_ssc-mir-455-3p_2
known_ssc-mir-455_1
known_ssc-mir-455_2
known_ssc-mir-487b_1
known_ssc-mir-487b_2
known_ssc-mir-491_1
known_ssc-mir-491_2
known_ssc-mir-497_1
known_ssc-mir-497_2
known_ssc-mir-499_1
known_ssc-mir-499_2
known_ssc-mir-503_1
known_ssc-mir-503_2
known_ssc-mir-505_1
known_ssc-mir-505_2
known_ssc-mir-592_1
known_ssc-mir-592_2
known_ssc-mir-652_1
known_ssc-mir-652_2
known_ssc-mir-739_1
known_ssc-mir-739_2
known_ssc-mir-7_1
known_ssc-mir-7_2
known_ssc-mir-891b_1
known_ssc-mir-891b_2
known_ssc-mir-9-1_1
known_ssc-mir-9-1_2
known_ssc-mir-9-2_1
known_ssc-mir-9-2_2
known_ssc-mir-9-3_1
known_ssc-mir-9-3_2
known_ssc-mir-92-1_1
known_ssc-mir-92-1_2
known_ssc-mir-92_1
known_ssc-mir-92_2
known_ssc-mir-92a_1
known_ssc-mir-92a_2
known_ssc-mir-92b_1
known_ssc-mir-92b_2
known_ssc-mir-93a_1
known_ssc-mir-93a_2
known_ssc-mir-93b_1
known_ssc-mir-93b_2
known_ssc-mir-95_1
known_ssc-mir-95_2
known_ssc-mir-96_1
known_ssc-mir-96_2
known_ssc-mir-98_1
known_ssc-mir-98_2
known_ssc-mir-99_1
known_ssc-mir-99_2
known_ssc-mir-99a_1
known_ssc-mir-99a_2
known_ssc-mir-99b_1
known_ssc-mir-99b_2
mdo-mir-139_9_6808356_6808425_-_3p_11
mdo-mir-181b_10_22839185_22839272_-_3p_2
mdo-mir-212_12_45599907_45599998_-_3p_5
mdo-mir-551a_6_43640507_43640590_-_5p_6
mdo-mir-551a_6_43640507_43640590_-_5p_7
mdo-mir-739_6_250391_250483_-_3p_1
mml-mir-220a_2_49930488_49930599_-_3p_14
mml-mir-220a_2_50064122_50064233_-_3p_14
mml-mir-346_14_90595786_90595872_-_3p_14
mml-mir-346_14_90595786_90595872_-_3p_4
mml-mir-346_14_90720812_90720898_-_3p_14
mml-mir-346_14_90720812_90720898_-_3p_4
mml-mir-922_13_101111620_101111700_-_5p_3
mmu-mir-101b_1_227255281_227255378_-_3p_10
mmu-mir-101b_1_227255281_227255378_-_3p_11
mmu-mir-148a_18_45214533_45214632_-_3p_-5
mmu-mir-208a_7_82117415_82117498_-_5p_2
mmu-mir-2133-2_6_258601_258696_-_3p_6
mmu-mir-2133-2_6_258601_258696_-_3p_7
mmu-mir-2143-2_6_251367_251451_-_3p_1
mmu-mir-2146_6_250359_250413_-_3p_0
mmu-mir-2182_6_252540_252656_+_3p_5
mmu-mir-2182_6_252540_252656_+_3p_6
mmu-mir-346_14_90595786_90595884_-_3p_14
mmu-mir-346_14_90595786_90595884_-_3p_4
mmu-mir-346_14_90720812_90720910_-_3p_14
mmu-mir-346_14_90720812_90720910_-_3p_4
mmu-mir-497_12_49575587_49575671_+_3p_-1
mmu-mir-497_12_49575587_49575671_+_3p_0
oan-mir-122_1_169284198_169284309_-_5p_14
oan-mir-122_1_169284198_169284309_-_5p_16
oan-mir-128-2_13_17766846_17766957_+_3p_3
oan-mir-129_18_18269468_18269596_+_3p_-5
oan-mir-129_18_18269468_18269596_+_3p_3
oan-mir-183_18_17172201_17172332_-_3p_0
oan-mir-183_18_17172201_17172332_-_5p_-5
oan-mir-208_7_82117406_82117517_-_5p_6
oan-mir-208_7_82117406_82117517_-_5p_7
oan-mir-222a_X_40478816_40478928_-_5p_-3
oan-mir-22_12_45319017_45319139_+_3p_2
oan-mir-22_12_45319017_45319139_+_3p_3
prediction_10_10978577_10978646_+_5p_-3
prediction_10_10978577_10978646_+_5p_-4
prediction_10_10978577_10978646_+_5p_-5
prediction_10_10978580_10978645_+_5p_-5
prediction_10_14028189_14028255_-_3p_0
prediction_10_14201584_14201656_-_5p_8
prediction_10_14201587_14201653_-_5p_5
prediction_10_14201589_14201655_-_5p_7
prediction_10_14492058_14492130_+_5p_1
prediction_10_14492058_14492130_+_5p_6
prediction_10_14492061_14492127_+_5p_3
prediction_10_22092437_22092504_-_5p_-5
prediction_10_2602805_2602869_+_5p_5
prediction_10_27574782_27574844_+_5p_-5
prediction_10_31341689_31341753_+_5p_11
prediction_10_31341689_31341753_+_5p_9
prediction_10_32424164_32424229_+_3p_16
prediction_10_32424164_32424229_+_5p_16
prediction_10_34048188_34048252_+_3p_3
prediction_10_37492762_37492837_-_5p_-5
prediction_10_37492770_37492833_-_5p_-3
prediction_10_37492770_37492833_-_5p_-5
prediction_10_4096742_4096808_+_3p_-3
prediction_10_44538817_44538893_-_5p_10
prediction_10_47302_47371_+_3p_10
prediction_10_47302_47371_+_5p_-5
prediction_10_48417118_48417189_+_5p_-5
prediction_10_48417118_48417191_+_5p_-5
prediction_10_61765139_61765213_-_5p_-4
prediction_10_61765139_61765213_-_5p_-5
prediction_10_62946855_62946919_+_5p_12
prediction_10_62946855_62946919_+_5p_15
prediction_10_7083118_7083176_+_5p_-5
prediction_10_8203263_8203322_+_5p_15
prediction_11_11522231_11522288_+_3p_9
prediction_11_15222415_15222487_-_5p_6
prediction_11_15371078_15371148_+_5p_-1
prediction_11_15485581_15485655_-_3p_9
prediction_11_15568245_15568319_-_3p_9
prediction_11_17567598_17567660_+_3p_-1
prediction_11_17567598_17567660_+_3p_-4
prediction_11_20232991_20233052_-_3p_2
prediction_11_20232991_20233052_-_3p_3
prediction_11_20232991_20233052_-_5p_-5
prediction_11_20656838_20656912_-_3p_7
prediction_11_20656842_20656910_+_5p_1
prediction_11_20656842_20656910_+_5p_2
prediction_11_20656842_20656910_+_5p_3
prediction_11_31094300_31094365_+_3p_-5
prediction_11_3776451_3776512_-_3p_-4
prediction_11_3776451_3776512_-_3p_-5
prediction_11_3776451_3776512_-_5p_9
prediction_11_39393310_39393372_-_5p_-3
prediction_11_39393311_39393373_+_3p_-5
prediction_11_39393311_39393373_+_5p_0
prediction_11_44147846_44147907_+_3p_12
prediction_11_44147846_44147907_+_3p_5
prediction_11_48896793_48896854_-_5p_-2
prediction_11_48896793_48896854_-_5p_-3
prediction_11_51838892_51838953_+_5p_-3
prediction_11_51838892_51838953_+_5p_-5
prediction_11_66560616_66560672_-_3p_-1
prediction_11_66560616_66560672_-_3p_-2
prediction_11_66560616_66560672_-_3p_-3
prediction_11_77595699_77595763_-_3p_-4
prediction_11_77595699_77595763_-_3p_-5
prediction_11_79375634_79375705_-_5p_-3
prediction_11_79375634_79375705_-_5p_-4
prediction_11_8739422_8739489_-_5p_-2
prediction_11_8739422_8739489_-_5p_-3
prediction_12_14483713_14483789_-_5p_10
prediction_12_14483713_14483789_-_5p_8
prediction_12_15254010_15254071_-_5p_-5
prediction_12_16269687_16269763_+_5p_3
prediction_12_16269687_16269763_+_5p_5
prediction_12_17392483_17392562_+_5p_5
prediction_12_17392483_17392562_+_5p_6
prediction_12_17392487_17392557_+_5p_1
prediction_12_17392487_17392557_+_5p_2
prediction_12_19382241_19382308_-_3p_5
prediction_12_19382244_19382306_-_3p_2
prediction_12_21412468_21412538_+_5p_15
prediction_12_21412468_21412538_+_5p_16
prediction_12_23210193_23210266_-_3p_1
prediction_12_23210193_23210266_-_3p_2
prediction_12_23210196_23210263_-_3p_-1
prediction_12_23210196_23210263_-_3p_-2
prediction_12_23210197_23210266_-_3p_-2
prediction_12_23210197_23210266_-_3p_-3
prediction_12_23210199_23210268_-_3p_-4
prediction_12_23210199_23210268_-_3p_-5
prediction_12_24235465_24235535_-_5p_2
prediction_12_24482490_24482563_+_5p_-5
prediction_12_28606081_28606156_-_5p_-5
prediction_12_34126013_34126084_-_5p_5
prediction_12_34544867_34544940_+_5p_-1
prediction_12_34544867_34544940_+_5p_-2
prediction_12_34544867_34544940_+_5p_-3
prediction_12_34544868_34544935_-_5p_-5
prediction_12_34544870_34544937_-_5p_-3
prediction_12_34544870_34544937_-_5p_-4
prediction_12_34544873_34544934_-_5p_-5
prediction_12_34668880_34668953_+_5p_-1
prediction_12_34668880_34668953_+_5p_-2
prediction_12_34668881_34668948_-_5p_-5
prediction_12_34668883_34668950_-_5p_-3
prediction_12_34668886_34668947_-_5p_-5
prediction_12_35219855_35219917_+_3p_-3
prediction_12_3736711_3736780_+_3p_12
prediction_12_3736711_3736780_+_3p_16
prediction_12_49070831_49070907_-_5p_-4
prediction_12_51757552_51757626_+_5p_-3
prediction_12_51757557_51757621_+_5p_-4
prediction_12_51757557_51757621_+_5p_-5
prediction_12_51786723_51786786_-_3p_2
prediction_12_51786723_51786786_-_3p_4
prediction_12_5243142_5243207_+_3p_-4
prediction_12_5243142_5243207_+_3p_-5
prediction_13_100213991_100214055_-_5p_-2
prediction_13_100213993_100214053_-_5p_-4
prediction_13_100213995_100214055_-_5p_-2
prediction_13_100213995_100214055_-_5p_-5
prediction_13_100293033_100293097_-_5p_-2
prediction_13_100293034_100293096_-_5p_-3
prediction_13_100293036_100293098_-_5p_-1
prediction_13_100293036_100293098_-_5p_-5
prediction_13_104082811_104082865_-_5p_13
prediction_13_104083430_104083490_+_3p_5
prediction_13_104483151_104483208_-_5p_-4
prediction_13_104483151_104483208_-_5p_-5
prediction_13_109090104_109090176_-_3p_7
prediction_13_109090106_109090178_-_3p_5
prediction_13_109090106_109090178_-_3p_6
prediction_13_110926088_110926161_-_3p_13
prediction_13_114404551_114404618_+_5p_-2
prediction_13_114404551_114404618_+_5p_-3
prediction_13_116731316_116731380_-_5p_-4
prediction_13_116731316_116731380_-_5p_-5
prediction_13_119803135_119803201_+_3p_14
prediction_13_119803135_119803201_+_3p_15
prediction_13_119803135_119803201_+_5p_3
prediction_13_121414942_121415016_-_3p_-3
prediction_13_121414942_121415016_-_3p_-4
prediction_13_121414942_121415016_-_3p_-5
prediction_13_121414942_121415016_-_5p_-3
prediction_13_121422750_121422826_-_5p_7
prediction_13_121422758_121422817_-_5p_-2
prediction_13_124857196_124857261_-_5p_-5
prediction_13_138885481_138885553_+_5p_-3
prediction_13_138885481_138885553_+_5p_-4
prediction_13_138885481_138885553_+_5p_-5
prediction_13_138885485_138885547_+_5p_-5
prediction_13_145000878_145000938_-_3p_-5
prediction_13_15819448_15819523_+_5p_9
prediction_13_21447221_21447293_-_5p_-3
prediction_13_23642837_23642909_+_5p_-2
prediction_13_23642837_23642909_+_5p_-3
prediction_13_23688038_23688100_-_5p_2
prediction_13_23688038_23688100_-_5p_3
prediction_13_23726565_23726637_+_5p_-2
prediction_13_23726565_23726637_+_5p_-3
prediction_13_32714106_32714163_-_5p_-5
prediction_13_40037950_40038026_-_3p_-1
prediction_13_40456713_40456783_+_5p_0
prediction_13_4470494_4470557_+_5p_12
prediction_13_4470494_4470557_+_5p_13
prediction_13_4470494_4470557_+_5p_14
prediction_13_5574230_5574291_+_3p_7
prediction_13_5574230_5574291_+_3p_8
prediction_13_55905076_55905137_-_3p_-3
prediction_13_55905076_55905137_-_3p_-5
prediction_13_60423429_60423503_+_5p_-4
prediction_13_60423429_60423503_+_5p_-5
prediction_13_60423429_60423503_-_5p_-5
prediction_13_60423432_60423502_+_5p_-5
prediction_13_62875726_62875790_-_5p_-3
prediction_13_67880150_67880207_-_3p_-5
prediction_13_67897811_67897866_-_3p_7
prediction_13_67897811_67897866_-_3p_9
prediction_13_68547660_68547726_+_5p_-2
prediction_13_69700174_69700230_+_3p_8
prediction_13_6986698_6986758_-_3p_5
prediction_13_73227672_73227745_-_5p_-4
prediction_13_73713407_73713482_+_3p_-4
prediction_13_8322305_8322376_-_3p_-4
prediction_13_8322305_8322376_-_3p_-5
prediction_13_85697061_85697122_+_5p_-3
prediction_13_86059764_86059836_+_3p_2
prediction_13_86059768_86059830_+_3p_-4
prediction_13_86059768_86059830_+_3p_-5
prediction_13_86059773_86059827_+_3p_-4
prediction_13_86906440_86906511_-_5p_4
prediction_13_86906440_86906511_-_5p_5
prediction_13_89530240_89530311_+_5p_-4
prediction_13_89530240_89530311_+_5p_-5
prediction_13_98792875_98792943_-_3p_-4
prediction_13_98792875_98792943_-_3p_-5
prediction_13_98792877_98792945_-_3p_-5
prediction_14_10005401_10005466_+_5p_-3
prediction_14_100224204_100224268_-_5p_-2
prediction_14_100224204_100224268_-_5p_-4
prediction_14_109056879_109056949_+_5p_-5
prediction_14_109056880_109056950_-_5p_-4
prediction_14_109056880_109056950_-_5p_-5
prediction_14_110219096_110219158_-_5p_-5
prediction_14_11036731_11036802_+_3p_-5
prediction_14_11036731_11036802_+_3p_3
prediction_14_112346226_112346296_+_5p_-4
prediction_14_112346226_112346296_+_5p_-5
prediction_14_11542637_11542693_-_3p_-5
prediction_14_115875435_115875495_+_5p_0
prediction_14_115875435_115875495_+_5p_1
prediction_14_115875435_115875495_+_5p_2
prediction_14_116064495_116064567_+_5p_-5
prediction_14_116064500_116064562_+_5p_-4
prediction_14_116064500_116064562_+_5p_-5
prediction_14_117100414_117100485_-_3p_5
prediction_14_117100414_117100485_-_3p_6
prediction_14_117658500_117658557_-_3p_10
prediction_14_117870616_117870673_-_3p_10
prediction_14_118462278_118462337_-_5p_0
prediction_14_127334429_127334487_+_5p_9
prediction_14_141839457_141839534_-_3p_12
prediction_14_141839457_141839534_-_3p_16
prediction_14_141839457_141839534_-_5p_-5
prediction_14_141839463_141839528_-_3p_10
prediction_14_141839463_141839528_-_3p_11
prediction_14_20082091_20082160_-_3p_-3
prediction_14_20082091_20082160_-_3p_-4
prediction_14_20082091_20082160_-_3p_-5
prediction_14_20829550_20829621_-_5p_-5
prediction_14_22049279_22049352_+_5p_-3
prediction_14_22049279_22049352_+_5p_-4
prediction_14_22049279_22049352_+_5p_-5
prediction_14_22673716_22673777_+_3p_12
prediction_14_24422263_24422320_+_5p_-2
prediction_14_25704856_25704915_+_3p_-4
prediction_14_25704856_25704915_+_3p_-5
prediction_14_32866526_32866594_-_5p_-3
prediction_14_32866526_32866594_-_5p_3
prediction_14_32910229_32910299_+_5p_3
prediction_14_32910229_32910299_+_5p_4
prediction_14_35098322_35098381_-_5p_11
prediction_14_35098322_35098381_-_5p_12
prediction_14_35484155_35484220_+_5p_-1
prediction_14_35484158_35484217_-_5p_-3
prediction_14_35484158_35484217_-_5p_-4
prediction_14_35753233_35753295_+_3p_9
prediction_14_44864855_44864933_+_3p_16
prediction_14_44864865_44864923_+_3p_10
prediction_14_44864865_44864923_+_3p_11
prediction_14_50823024_50823089_+_3p_-1
prediction_14_50823024_50823089_+_3p_0
prediction_14_51473985_51474046_-_3p_-5
prediction_14_51473985_51474046_-_3p_4
prediction_14_5590438_5590495_+_3p_8
prediction_14_5590438_5590495_+_3p_9
prediction_14_59435670_59435729_-_3p_15
prediction_14_59435670_59435729_-_3p_16
prediction_14_60186737_60186809_+_5p_-5
prediction_14_61690864_61690920_+_3p_-5
prediction_14_61832252_61832319_+_3p_3
prediction_14_61832258_61832313_+_3p_-3
prediction_14_62081641_62081708_-_3p_0
prediction_14_62081641_62081708_-_3p_1
prediction_14_63052265_63052339_-_5p_-5
prediction_14_64526906_64526964_-_5p_5
prediction_14_64526906_64526964_-_5p_9
prediction_14_65766924_65766981_-_5p_-5
prediction_14_67847633_67847703_+_5p_0
prediction_14_71887759_71887817_+_5p_15
prediction_14_71958331_71958389_-_5p_15
prediction_14_74099115_74099184_-_5p_-5
prediction_14_74196068_74196141_-_5p_-2
prediction_14_74196070_74196143_-_3p_7
prediction_14_74196070_74196143_-_5p_-4
prediction_14_74196070_74196143_-_5p_0
prediction_14_74223641_74223709_-_5p_-1
prediction_14_74223646_74223708_-_5p_-2
prediction_14_74283239_74283302_-_5p_-3
prediction_14_74642364_74642424_-_5p_-4
prediction_14_74642364_74642424_-_5p_-5
prediction_14_80989543_80989614_+_3p_-1
prediction_14_88853182_88853255_+_5p_-3
prediction_14_88964154_88964227_+_5p_-3
prediction_14_92906394_92906464_-_3p_6
prediction_14_92906394_92906464_-_3p_7
prediction_14_92906399_92906459_-_3p_1
prediction_14_92906399_92906459_-_3p_2
prediction_14_92906399_92906459_-_5p_-3
prediction_14_92906399_92906459_-_5p_-4
prediction_14_92906399_92906459_-_5p_-5
prediction_14_93887691_93887761_+_5p_-3
prediction_14_93887691_93887761_+_5p_-5
prediction_14_93887694_93887760_+_5p_-4
prediction_14_93887694_93887760_+_5p_-5
prediction_14_94188229_94188307_-_5p_-5
prediction_14_94422507_94422579_-_3p_10
prediction_14_94422507_94422579_-_3p_5
prediction_14_94422511_94422575_-_3p_6
prediction_14_94422512_94422574_-_3p_0
prediction_14_94422512_94422574_-_3p_5
prediction_14_94422514_94422576_-_3p_-2
prediction_14_94422514_94422576_-_3p_3
prediction_14_99928815_99928881_-_3p_-4
prediction_14_99928815_99928881_-_3p_-5
prediction_15_100197859_100197931_-_3p_11
prediction_15_100197861_100197933_-_3p_6
prediction_15_100197861_100197933_-_3p_9
prediction_15_100197866_100197925_-_3p_1
prediction_15_100197866_100197925_-_3p_4
prediction_15_101485057_101485121_-_3p_15
prediction_15_101485057_101485121_-_3p_16
prediction_15_111009634_111009690_-_5p_14
prediction_15_119119064_119119124_-_5p_4
prediction_15_119119064_119119124_-_5p_9
prediction_15_123810260_123810325_-_3p_2
prediction_15_123810260_123810325_-_3p_3
prediction_15_124077856_124077932_+_3p_7
prediction_15_124077856_124077932_+_5p_-3
prediction_15_124077856_124077932_+_5p_-5
prediction_15_124188539_124188615_-_3p_5
prediction_15_124188539_124188615_-_5p_-1
prediction_15_124188539_124188615_-_5p_-3
prediction_15_126958503_126958572_+_3p_7
prediction_15_13223998_13224063_-_5p_4
prediction_15_133858489_133858548_-_5p_0
prediction_15_14179501_14179567_+_5p_-5
prediction_15_14326287_14326343_+_5p_8
prediction_15_14390446_14390503_-_3p_-5
prediction_15_14390446_14390503_-_3p_1
prediction_15_14393477_14393541_-_3p_9
prediction_15_14393606_14393670_-_3p_11
prediction_15_14393606_14393670_-_3p_12
prediction_15_14393606_14393670_-_3p_7
prediction_15_14393608_14393672_-_3p_10
prediction_15_14393608_14393672_-_3p_5
prediction_15_14393608_14393672_-_3p_9
prediction_15_14393608_14393672_-_5p_-5
prediction_15_24459766_24459824_-_3p_7
prediction_15_45424235_45424297_-_3p_3
prediction_15_45424235_45424308_+_5p_10
prediction_15_45424235_45424308_+_5p_11
prediction_15_45424240_45424302_+_5p_5
prediction_15_45424240_45424302_+_5p_6
prediction_15_45424241_45424303_-_5p_-2
prediction_15_45424241_45424303_-_5p_-3
prediction_15_45424243_45424305_-_5p_0
prediction_15_45679740_45679807_-_5p_-5
prediction_15_45679746_45679809_-_5p_-3
prediction_15_45679746_45679809_-_5p_-5
prediction_15_5404212_5404287_-_5p_-2
prediction_15_56124411_56124485_+_5p_-3
prediction_15_56124411_56124485_+_5p_-4
prediction_15_56124411_56124485_+_5p_-5
prediction_15_57823777_57823831_-_3p_10
prediction_15_58768573_58768631_-_5p_1
prediction_15_58768573_58768631_-_5p_2
prediction_15_62759434_62759489_-_5p_3
prediction_15_68801727_68801793_-_5p_14
prediction_15_68801727_68801793_-_5p_15
prediction_15_68922333_68922399_-_5p_14
prediction_15_68922333_68922399_-_5p_15
prediction_15_73046967_73047039_-_5p_-3
prediction_15_73046970_73047036_-_5p_-4
prediction_15_73046970_73047036_-_5p_-5
prediction_15_73111418_73111495_-_5p_4
prediction_15_73111418_73111495_-_5p_5
prediction_15_73221914_73221991_-_5p_4
prediction_15_73221914_73221991_-_5p_5
prediction_15_77775900_77775971_+_5p_6
prediction_15_77961173_77961244_+_5p_6
prediction_15_8402472_8402541_-_5p_1
prediction_15_8402474_8402543_-_5p_3
prediction_15_8402476_8402545_-_5p_5
prediction_15_9728621_9728682_-_5p_2
prediction_15_99648151_99648221_+_5p_-1
prediction_15_99648151_99648221_+_5p_-2
prediction_15_99648154_99648216_+_5p_-4
prediction_15_99648154_99648216_+_5p_-5
prediction_15_99648154_99648216_-_5p_-4
prediction_15_99648157_99648215_+_5p_-4
prediction_15_99648157_99648215_+_5p_-5
prediction_16_12865001_12865075_-_5p_-5
prediction_16_15898940_15899012_+_5p_-2
prediction_16_15898940_15899012_+_5p_-3
prediction_16_22941236_22941304_-_5p_-3
prediction_16_22941236_22941304_-_5p_-5
prediction_16_22941241_22941303_-_5p_-4
prediction_16_22941241_22941303_-_5p_-5
prediction_16_25243007_25243080_-_5p_0
prediction_16_25243014_25243077_-_5p_-3
prediction_16_25243014_25243077_-_5p_-5
prediction_16_34897772_34897832_-_3p_-1
prediction_16_37791644_37791716_+_5p_5
prediction_16_37791644_37791716_+_5p_6
prediction_16_37791649_37791711_+_5p_0
prediction_16_37791649_37791711_+_5p_1
prediction_16_37962747_37962819_-_5p_3
prediction_16_37962747_37962819_-_5p_4
prediction_16_37962749_37962821_-_5p_5
prediction_16_37962749_37962821_-_5p_6
prediction_16_37962754_37962816_-_5p_0
prediction_16_37962754_37962816_-_5p_1
prediction_16_471636_471701_-_3p_2
prediction_16_52724623_52724681_-_5p_-3
prediction_16_5725808_5725875_-_5p_0
prediction_16_63629178_63629244_+_3p_4
prediction_16_6383782_6383843_-_3p_-2
prediction_16_65588757_65588822_+_3p_2
prediction_16_65588757_65588822_+_3p_3
prediction_16_65588757_65588822_+_3p_4
prediction_16_65588757_65588822_+_5p_-5
prediction_16_68622284_68622346_-_5p_1
prediction_16_72466390_72466457_+_5p_-5
prediction_16_72991545_72991607_+_3p_-5
prediction_17_11100800_11100873_-_5p_6
prediction_17_11100805_11100872_-_5p_5
prediction_17_11433788_11433858_-_5p_0
prediction_17_11539461_11539531_+_5p_0
prediction_17_11734364_11734436_-_5p_-3
prediction_17_11734364_11734436_-_5p_8
prediction_17_11734367_11734433_-_5p_5
prediction_17_11833477_11833549_-_5p_-3
prediction_17_11833477_11833549_-_5p_8
prediction_17_11833480_11833546_-_5p_5
prediction_17_12008819_12008883_-_5p_-1
prediction_17_12008819_12008883_-_5p_-3
prediction_17_12008821_12008885_-_5p_-5
prediction_17_12908247_12908324_+_3p_10
prediction_17_12908247_12908324_+_3p_13
prediction_17_12908250_12908319_+_3p_5
prediction_17_12908250_12908319_+_3p_8
prediction_17_14131600_14131677_-_3p_11
prediction_17_14131600_14131677_-_3p_14
prediction_17_14131602_14131679_-_3p_12
prediction_17_14131602_14131679_-_3p_9
prediction_17_14131607_14131674_-_3p_4
prediction_17_14131607_14131674_-_3p_7
prediction_17_14971838_14971897_+_3p_-5
prediction_17_16864611_16864671_+_5p_11
prediction_17_27406548_27406604_-_3p_-1
prediction_17_27406548_27406604_-_3p_1
prediction_17_27406548_27406604_-_5p_-5
prediction_17_35701572_35701645_+_5p_-3
prediction_17_35701572_35701645_+_5p_-5
prediction_17_40609367_40609426_-_5p_4
prediction_17_43412112_43412175_-_5p_-2
prediction_17_43412112_43412175_-_5p_-3
prediction_17_44473228_44473286_-_3p_1
prediction_17_47170291_47170358_+_5p_-4
prediction_17_47170291_47170358_+_5p_-5
prediction_17_47728369_47728442_+_3p_8
prediction_17_47728369_47728442_+_3p_9
prediction_17_51004408_51004467_+_5p_15
prediction_17_53580253_53580330_-_5p_-3
prediction_17_53580253_53580330_-_5p_-5
prediction_17_54534512_54534572_-_3p_-1
prediction_17_54534512_54534572_-_3p_0
prediction_17_54534514_54534574_-_3p_-2
prediction_17_54534514_54534574_-_3p_-3
prediction_17_59629191_59629259_+_5p_-3
prediction_17_60928797_60928857_-_3p_4
prediction_17_60928797_60928857_-_5p_2
prediction_17_60928797_60928857_-_5p_3
prediction_17_60928797_60928857_-_5p_4
prediction_17_62821482_62821542_+_5p_4
prediction_17_63095930_63095990_-_5p_-5
prediction_17_63095930_63095990_-_5p_4
prediction_17_63460117_63460177_+_5p_2
prediction_17_63460117_63460177_+_5p_3
prediction_17_8679166_8679224_-_3p_-1
prediction_17_8679166_8679224_-_3p_-2
prediction_17_8679168_8679226_-_3p_-3
prediction_17_8679168_8679226_-_3p_-4
prediction_18_10000358_10000429_+_5p_-3
prediction_18_10000358_10000429_+_5p_-5
prediction_18_15370023_15370086_-_5p_-1
prediction_18_19087455_19087531_+_5p_0
prediction_18_19087458_19087528_+_5p_-3
prediction_18_19087458_19087528_+_5p_-5
prediction_18_39523988_39524055_+_5p_2
prediction_18_39523988_39524055_+_5p_3
prediction_18_43752156_43752226_-_5p_1
prediction_18_43752163_43752223_-_5p_-2
prediction_18_47440864_47440937_+_3p_-1
prediction_18_47826973_47827040_+_5p_-4
prediction_18_47826973_47827040_+_5p_-5
prediction_18_51732532_51732595_+_3p_1
prediction_18_53313483_53313543_+_5p_15
prediction_18_53313483_53313543_+_5p_16
prediction_18_6969297_6969373_-_5p_-3
prediction_18_6969297_6969373_-_5p_-5
prediction_18_6969302_6969364_-_5p_-4
prediction_18_6969302_6969364_-_5p_-5
prediction_18_7417127_7417193_-_5p_-2
prediction_18_7417127_7417193_-_5p_-3
prediction_18_7417127_7417193_-_5p_-4
prediction_18_7775574_7775649_-_5p_-3
prediction_18_7775574_7775649_-_5p_-4
prediction_18_8420144_8420218_-_3p_13
prediction_18_8450421_8450483_+_5p_-3
prediction_18_8450421_8450483_+_5p_13
prediction_18_9350766_9350833_-_5p_-5
prediction_1_102795811_102795876_-_5p_-2
prediction_1_109231798_109231861_+_5p_-4
prediction_1_109857723_109857787_+_5p_-4
prediction_1_109857723_109857787_+_5p_-5
prediction_1_134970769_134970829_+_3p_12
prediction_1_136805425_136805497_+_5p_1
prediction_1_136805429_136805493_+_5p_-3
prediction_1_136805434_136805488_+_5p_-3
prediction_1_137210662_137210741_-_5p_-5
prediction_1_144986546_144986612_+_5p_16
prediction_1_144986548_144986608_+_5p_14
prediction_1_146333652_146333723_-_5p_12
prediction_1_147052552_147052611_+_3p_3
prediction_1_149834762_149834831_-_5p_-4
prediction_1_149834762_149834831_-_5p_-5
prediction_1_162553648_162553716_-_5p_-5
prediction_1_165028452_165028513_-_3p_-1
prediction_1_165028452_165028513_-_3p_-2
prediction_1_170436697_170436759_-_5p_11
prediction_1_174861120_174861178_+_5p_14
prediction_1_174861120_174861178_+_5p_16
prediction_1_183180604_183180668_-_5p_0
prediction_1_184272404_184272462_+_5p_-3
prediction_1_187583640_187583700_+_3p_-5
prediction_1_188619228_188619293_+_5p_0
prediction_1_188846967_188847033_+_3p_-3
prediction_1_191689912_191689974_+_3p_-4
prediction_1_191689912_191689974_+_3p_-5
prediction_1_20142383_20142440_+_3p_3
prediction_1_203136132_203136189_+_3p_1
prediction_1_203136132_203136189_+_3p_2
prediction_1_203136132_203136189_+_3p_3
prediction_1_203342980_203343041_+_3p_16
prediction_1_213857704_213857770_+_3p_-2
prediction_1_213857704_213857770_+_3p_-4
prediction_1_217754999_217755061_-_3p_7
prediction_1_217754999_217755061_-_3p_9
prediction_1_225594385_225594438_-_3p_-2
prediction_1_225594385_225594438_-_3p_0
prediction_1_225594563_225594623_-_5p_10
prediction_1_225594563_225594623_-_5p_9
prediction_1_228235098_228235159_+_5p_-2
prediction_1_228235098_228235159_+_5p_-3
prediction_1_228272654_228272717_-_3p_-5
prediction_1_242406078_242406145_-_5p_-4
prediction_1_242406078_242406145_-_5p_-5
prediction_1_242876043_242876102_-_5p_3
prediction_1_242876043_242876102_-_5p_4
prediction_1_242876043_242876102_-_5p_5
prediction_1_243997243_243997312_+_5p_-1
prediction_1_243997243_243997312_+_5p_6
prediction_1_246861659_246861716_-_3p_-4
prediction_1_246861659_246861716_-_3p_-5
prediction_1_247695261_247695328_-_5p_-4
prediction_1_247695261_247695328_-_5p_-5
prediction_1_249721522_249721588_+_3p_-1
prediction_1_249721522_249721588_+_3p_-3
prediction_1_26235160_26235219_+_3p_-1
prediction_1_26235160_26235219_+_3p_0
prediction_1_264426865_264426927_-_3p_3
prediction_1_266006296_266006360_+_3p_-5
prediction_1_267595589_267595648_-_5p_-3
prediction_1_267595589_267595648_-_5p_-5
prediction_1_267848155_267848222_-_3p_16
prediction_1_271942761_271942829_+_3p_9
prediction_1_27225704_27225771_+_5p_-5
prediction_1_274143573_274143630_-_3p_4
prediction_1_282328075_282328150_+_5p_-3
prediction_1_283871940_283872004_-_5p_-1
prediction_1_284977794_284977864_-_5p_-4
prediction_1_284977794_284977864_-_5p_-5
prediction_1_287606164_287606239_-_5p_-5
prediction_1_290036466_290036534_-_5p_-3
prediction_1_290036466_290036534_-_5p_-5
prediction_1_29851747_29851812_-_5p_5
prediction_1_32826078_32826140_-_3p_-4
prediction_1_32826078_32826140_-_3p_-5
prediction_1_39058214_39058275_-_3p_12
prediction_1_45199812_45199871_-_3p_-4
prediction_1_45199812_45199871_-_3p_-5
prediction_1_45199813_45199882_-_3p_-2
prediction_1_45199813_45199882_-_3p_-3
prediction_1_45199813_45199882_-_3p_-5
prediction_1_45199814_45199873_-_3p_-3
prediction_1_45199814_45199873_-_3p_-4
prediction_1_45199814_45199873_-_3p_-5
prediction_1_46508703_46508763_+_5p_6
prediction_1_47556758_47556825_+_3p_15
prediction_1_47556758_47556825_+_3p_16
prediction_1_50360147_50360209_+_5p_-5
prediction_1_5548377_5548440_-_5p_-1
prediction_1_5548377_5548440_-_5p_4
prediction_1_5548381_5548444_-_5p_-3
prediction_1_60041454_60041518_+_5p_-5
prediction_1_62777260_62777330_-_5p_-4
prediction_1_62777260_62777330_-_5p_-5
prediction_1_64953740_64953806_+_5p_4
prediction_1_69830707_69830770_-_3p_-3
prediction_1_69830707_69830770_-_3p_-5
prediction_1_69830707_69830770_-_5p_-4
prediction_1_69830707_69830770_-_5p_-5
prediction_1_75759797_75759867_+_5p_-5
prediction_1_76358043_76358113_+_5p_-3
prediction_1_76358043_76358113_+_5p_-5
prediction_1_76814270_76814341_-_5p_-5
prediction_1_77625034_77625109_+_5p_-5
prediction_1_77625037_77625106_-_5p_-5
prediction_1_77709386_77709457_+_5p_1
prediction_1_77709389_77709454_+_5p_-2
prediction_1_77709389_77709454_+_5p_-3
prediction_1_82766901_82766969_+_3p_2
prediction_1_82766901_82766969_+_3p_4
prediction_1_83478103_83478171_+_5p_-5
prediction_1_8650868_8650940_+_5p_4
prediction_1_87072837_87072900_+_5p_-3
prediction_1_87072837_87072900_+_5p_-4
prediction_1_8796460_8796529_-_5p_4
prediction_1_8796461_8796532_+_3p_-3
prediction_1_8796461_8796532_+_3p_-4
prediction_1_8796461_8796532_+_3p_3
prediction_1_8796468_8796529_-_5p_4
prediction_1_91757769_91757829_+_5p_-4
prediction_1_91757769_91757829_+_5p_-5
prediction_1_9257824_9257888_-_3p_3
prediction_1_9257824_9257888_-_5p_-5
prediction_1_93701054_93701120_+_5p_-5
prediction_1_95087325_95087384_-_5p_-4
prediction_1_95087325_95087384_-_5p_-5
prediction_2_104945625_104945696_+_3p_-4
prediction_2_104945625_104945696_+_3p_-5
prediction_2_104945625_104945696_+_5p_-5
prediction_2_105059090_105059154_+_5p_-3
prediction_2_105059892_105059956_+_5p_-3
prediction_2_106350061_106350119_+_5p_7
prediction_2_106350061_106350119_+_5p_8
prediction_2_108628142_108628204_-_5p_-3
prediction_2_115494604_115494673_-_3p_-1
prediction_2_115494604_115494673_-_3p_0
prediction_2_115494604_115494673_-_3p_1
prediction_2_120392163_120392222_-_3p_15
prediction_2_120392163_120392222_-_3p_16
prediction_2_120392163_120392222_-_5p_12
prediction_2_120465078_120465134_+_5p_9
prediction_2_123220328_123220393_-_5p_-3
prediction_2_127228089_127228152_-_5p_-5
prediction_2_12972059_12972118_-_5p_15
prediction_2_12972059_12972118_-_5p_16
prediction_2_133711858_133711931_-_5p_-2
prediction_2_133711858_133711931_-_5p_-4
prediction_2_133711862_133711927_-_5p_1
prediction_2_138866978_138867042_+_3p_2
prediction_2_138918708_138918772_-_3p_0
prediction_2_14133202_14133266_-_5p_-5
prediction_2_16111114_16111185_+_3p_10
prediction_2_18185332_18185403_+_5p_-3
prediction_2_18185335_18185400_+_5p_-4
prediction_2_18185335_18185400_+_5p_-5
prediction_2_20713887_20713938_-_5p_4
prediction_2_20713887_20713938_-_5p_5
prediction_2_37319059_37319127_-_3p_-4
prediction_2_37319059_37319127_-_3p_-5
prediction_2_37319061_37319125_-_5p_-5
prediction_2_37908303_37908366_-_5p_-5
prediction_2_45132768_45132829_+_5p_-2
prediction_2_45132768_45132829_+_5p_-3
prediction_2_45132768_45132830_+_5p_-2
prediction_2_45132768_45132830_+_5p_-3
prediction_2_45368965_45369034_-_5p_-5
prediction_2_4607438_4607507_-_5p_-5
prediction_2_49023394_49023462_+_3p_-3
prediction_2_49023394_49023462_+_3p_-4
prediction_2_49023396_49023462_+_3p_-3
prediction_2_49023396_49023462_+_3p_-4
prediction_2_51459799_51459862_-_3p_-1
prediction_2_51459801_51459868_+_3p_1
prediction_2_55860712_55860777_+_3p_-4
prediction_2_56012600_56012666_-_3p_-5
prediction_2_56012600_56012666_-_5p_-1
prediction_2_56012600_56012666_-_5p_-2
prediction_2_63153815_63153886_-_3p_-2
prediction_2_63153815_63153886_-_3p_-5
prediction_2_63454832_63454895_+_5p_3
prediction_2_63700909_63700976_-_3p_-3
prediction_2_6885250_6885310_+_3p_-3
prediction_2_6885250_6885310_+_3p_-4
prediction_2_68952152_68952215_+_5p_10
prediction_2_68952152_68952215_+_5p_11
prediction_2_68952152_68952215_+_5p_12
prediction_2_6897254_6897327_-_5p_-4
prediction_2_6897258_6897327_-_5p_-4
prediction_2_6897261_6897324_-_5p_-3
prediction_2_6897261_6897324_-_5p_-5
prediction_2_69766543_69766614_-_5p_-3
prediction_2_70129837_70129905_+_5p_-3
prediction_2_70129837_70129905_+_5p_-4
prediction_2_74117797_74117857_-_3p_14
prediction_2_74117797_74117857_-_3p_15
prediction_2_74117797_74117857_-_3p_16
prediction_2_74255200_74255262_+_3p_-4
prediction_2_74255200_74255262_+_3p_-5
prediction_2_76634212_76634269_-_5p_4
prediction_2_76634212_76634269_-_5p_6
prediction_2_78200597_78200652_+_5p_2
prediction_2_78200597_78200652_+_5p_3
prediction_2_78442574_78442645_-_5p_-2
prediction_2_78442718_78442780_+_3p_-4
prediction_2_90416879_90416946_+_5p_-5
prediction_2_90416879_90416948_+_5p_-5
prediction_2_91004831_91004886_-_3p_11
prediction_2_91004831_91004886_-_3p_15
prediction_2_91596372_91596450_+_5p_-5
prediction_2_91629223_91629278_+_3p_15
prediction_2_91629223_91629278_+_3p_16
prediction_2_9860928_9860997_+_5p_-4
prediction_2_9860928_9860997_+_5p_-5
prediction_3_103449730_103449794_+_3p_-4
prediction_3_103449730_103449794_+_3p_-5
prediction_3_104240453_104240519_-_5p_-5
prediction_3_104971545_104971609_-_3p_-5
prediction_3_105371909_105371966_-_3p_13
prediction_3_105371909_105371975_-_3p_13
prediction_3_10575880_10575953_-_5p_-5
prediction_3_113574142_113574213_-_3p_-4
prediction_3_113574143_113574212_-_5p_-4
prediction_3_113610312_113610374_-_3p_-4
prediction_3_113610312_113610378_-_3p_-4
prediction_3_113610312_113610378_-_3p_-5
prediction_3_113859688_113859753_+_5p_-1
prediction_3_113859688_113859753_+_5p_-3
prediction_3_115062979_115063053_+_3p_5
prediction_3_117032570_117032635_+_5p_-3
prediction_3_117032575_117032634_-_5p_-4
prediction_3_117032575_117032634_-_5p_-5
prediction_3_117907143_117907198_+_3p_-4
prediction_3_119194443_119194509_-_5p_10
prediction_3_119194445_119194511_-_5p_12
prediction_3_119194447_119194513_-_5p_14
prediction_3_122788248_122788318_+_3p_10
prediction_3_13796508_13796578_-_5p_3
prediction_3_13796510_13796578_+_5p_-3
prediction_3_16736253_16736318_+_5p_-5
prediction_3_18071381_18071449_-_5p_-5
prediction_3_21770037_21770099_+_5p_0
prediction_3_21770037_21770099_+_5p_3
prediction_3_3466163_3466238_-_5p_-4
prediction_3_35095378_35095441_+_3p_-5
prediction_3_35095378_35095441_+_3p_1
prediction_3_35368742_35368805_+_3p_-5
prediction_3_35368742_35368805_+_3p_1
prediction_3_3603941_3604016_+_5p_-5
prediction_3_37589526_37589600_+_5p_5
prediction_3_37589526_37589600_+_5p_6
prediction_3_40019637_40019698_+_5p_1
prediction_3_40990747_40990811_-_3p_-1
prediction_3_40990747_40990811_-_3p_-2
prediction_3_41976644_41976703_+_3p_-3
prediction_3_41976644_41976703_+_3p_-5
prediction_3_43312207_43312268_-_3p_-2
prediction_3_43312207_43312268_-_3p_-3
prediction_3_43312207_43312268_-_3p_-4
prediction_3_50557350_50557416_-_5p_-3
prediction_3_50557350_50557416_-_5p_-5
prediction_3_50557352_50557418_-_5p_-1
prediction_3_50557352_50557418_-_5p_-3
prediction_3_51136884_51136940_+_3p_-5
prediction_3_51912675_51912746_-_5p_-2
prediction_3_51912675_51912746_-_5p_-4
prediction_3_51912675_51912746_-_5p_-5
prediction_3_51912678_51912743_-_5p_-5
prediction_3_51912680_51912745_-_5p_-3
prediction_3_51912680_51912745_-_5p_-5
prediction_3_53860492_53860555_-_5p_-5
prediction_3_53860493_53860554_-_5p_-4
prediction_3_53860493_53860554_-_5p_-5
prediction_3_53860495_53860556_-_5p_-4
prediction_3_53860495_53860556_-_5p_-5
prediction_3_65092217_65092277_-_5p_16
prediction_3_66047358_66047435_-_5p_-4
prediction_3_66047358_66047435_-_5p_-5
prediction_3_66337042_66337118_+_5p_-3
prediction_3_68219883_68219946_-_5p_0
prediction_3_68219883_68219946_-_5p_2
prediction_3_68219888_68219945_-_5p_-1
prediction_3_68219888_68219945_-_5p_1
prediction_3_6920405_6920472_+_3p_-4
prediction_3_6920405_6920472_+_3p_-5
prediction_3_6920407_6920472_+_3p_-4
prediction_3_6920407_6920472_+_3p_-5
prediction_3_7191420_7191478_-_5p_-4
prediction_3_7432171_7432229_-_5p_-4
prediction_3_74723736_74723808_+_5p_2
prediction_3_74723736_74723808_+_5p_3
prediction_3_78047342_78047394_-_3p_-4
prediction_3_78047342_78047394_-_3p_-5
prediction_3_82798530_82798600_-_5p_-1
prediction_3_82798530_82798600_-_5p_-3
prediction_3_82798532_82798602_-_5p_-1
prediction_3_82798532_82798602_-_5p_1
prediction_3_82798533_82798603_+_5p_-3
prediction_3_82798533_82798603_+_5p_-5
prediction_3_85635682_85635739_+_3p_-5
prediction_3_88105793_88105852_+_3p_-2
prediction_3_8934027_8934092_+_3p_-1
prediction_3_8934027_8934092_+_3p_-2
prediction_3_90187119_90187179_+_5p_-4
prediction_3_90187119_90187179_+_5p_-5
prediction_3_92924250_92924314_+_5p_-3
prediction_3_94477472_94477543_+_5p_-4
prediction_3_94477472_94477543_+_5p_-5
prediction_3_9468573_9468632_+_5p_-4
prediction_3_9468573_9468632_+_5p_-5
prediction_3_99384375_99384446_+_3p_-3
prediction_3_99384375_99384446_+_3p_-4
prediction_3_99384375_99384446_+_5p_6
prediction_3_99384375_99384446_+_5p_8
prediction_3_99384375_99384446_+_5p_9
prediction_4_105822278_105822341_+_5p_-4
prediction_4_11115760_11115836_+_5p_16
prediction_4_112488430_112488489_+_3p_8
prediction_4_11347281_11347346_+_3p_7
prediction_4_11347281_11347346_+_3p_8
prediction_4_11347284_11347343_+_3p_3
prediction_4_11347284_11347343_+_3p_4
prediction_4_11347284_11347343_+_3p_5
prediction_4_121696197_121696260_-_5p_-2
prediction_4_121696197_121696260_-_5p_-3
prediction_4_122479288_122479354_+_5p_-4
prediction_4_131579571_131579634_-_3p_-4
prediction_4_131579571_131579634_-_3p_-5
prediction_4_135179770_135179837_+_5p_-3
prediction_4_14700135_14700204_+_3p_10
prediction_4_14700135_14700204_+_3p_7
prediction_4_15864993_15865053_-_5p_-4
prediction_4_15864993_15865053_-_5p_-5
prediction_4_16984106_16984165_+_5p_-4
prediction_4_17906412_17906482_+_5p_-5
prediction_4_18552196_18552256_-_3p_13
prediction_4_18552196_18552256_-_3p_14
prediction_4_21445610_21445679_-_5p_16
prediction_4_23997874_23997939_-_3p_0
prediction_4_29510700_29510759_-_5p_11
prediction_4_29510700_29510759_-_5p_12
prediction_4_29510702_29510761_-_5p_13
prediction_4_29510702_29510761_-_5p_14
prediction_4_35175498_35175573_-_5p_-4
prediction_4_35175498_35175573_-_5p_-5
prediction_4_36403060_36403126_+_5p_-1
prediction_4_36403060_36403126_+_5p_-3
prediction_4_36403060_36403128_+_5p_-1
prediction_4_36403060_36403128_+_5p_-3
prediction_4_38894906_38894966_+_3p_14
prediction_4_41959957_41960029_+_5p_10
prediction_4_41959957_41960029_+_5p_9
prediction_4_433654_433721_+_5p_-2
prediction_4_48988749_48988807_-_5p_-4
prediction_4_48988749_48988807_-_5p_-5
prediction_4_49562615_49562675_-_3p_-4
prediction_4_49562615_49562675_-_3p_-5
prediction_4_49573115_49573184_-_5p_-4
prediction_4_49573115_49573184_-_5p_-5
prediction_4_49573116_49573183_-_5p_-4
prediction_4_49573116_49573183_-_5p_-5
prediction_4_5111467_5111531_-_5p_8
prediction_4_57750569_57750648_-_5p_-1
prediction_4_57750573_57750644_-_5p_-5
prediction_4_63275551_63275609_-_3p_-4
prediction_4_63275551_63275609_-_3p_-5
prediction_4_63275555_63275613_-_3p_-1
prediction_4_64245377_64245441_-_5p_-1
prediction_4_64245377_64245441_-_5p_-3
prediction_4_64245379_64245443_-_3p_-5
prediction_4_64245379_64245443_-_5p_-5
prediction_4_69095321_69095391_-_5p_-5
prediction_4_69095321_69095391_-_5p_2
prediction_4_71226777_71226841_-_5p_2
prediction_4_75504899_75504969_-_5p_0
prediction_4_75504899_75504969_-_5p_1
prediction_4_75504899_75504969_-_5p_2
prediction_4_79892330_79892395_+_5p_11
prediction_4_84709385_84709453_+_5p_0
prediction_4_84709385_84709453_+_5p_2
prediction_4_86748345_86748419_-_5p_-2
prediction_4_86748346_86748418_-_5p_-3
prediction_4_86748346_86748418_-_5p_-4
prediction_4_86748348_86748416_-_5p_-5
prediction_4_92547600_92547660_-_3p_15
prediction_4_92547600_92547660_-_3p_16
prediction_4_95182368_95182431_+_3p_7
prediction_4_9554192_9554260_-_5p_-1
prediction_4_9554192_9554260_-_5p_-2
prediction_4_96747055_96747119_-_3p_14
prediction_4_98411653_98411720_+_3p_2
prediction_4_98411653_98411720_+_3p_3
prediction_4_98498304_98498376_+_5p_-4
prediction_4_98498304_98498376_+_5p_-5
prediction_4_98498304_98498378_+_5p_-4
prediction_4_98498304_98498378_+_5p_-5
prediction_4_98498310_98498372_+_5p_-5
prediction_5_12086358_12086423_-_5p_4
prediction_5_12086360_12086425_-_5p_6
prediction_5_12271848_12271902_+_5p_-2
prediction_5_14165691_14165761_-_3p_-2
prediction_5_14165694_14165760_+_5p_-4
prediction_5_14165694_14165760_+_5p_-5
prediction_5_15078600_15078662_+_5p_-3
prediction_5_15744260_15744325_+_5p_-4
prediction_5_15744260_15744325_+_5p_-5
prediction_5_1615642_1615709_+_3p_-1
prediction_5_17349754_17349814_-_5p_14
prediction_5_17349754_17349814_-_5p_16
prediction_5_20696811_20696888_+_5p_-2
prediction_5_20696811_20696888_+_5p_0
prediction_5_23405047_23405118_+_3p_-1
prediction_5_23511368_23511440_+_3p_-1
prediction_5_24024533_24024591_-_3p_11
prediction_5_24024533_24024591_-_3p_12
prediction_5_24024533_24024591_-_3p_13
prediction_5_24024533_24024591_-_5p_-4
prediction_5_29429047_29429114_+_5p_-4
prediction_5_31459211_31459277_-_3p_-3
prediction_5_31459211_31459277_-_3p_-4
prediction_5_31459211_31459277_-_5p_-1
prediction_5_31459211_31459277_-_5p_-3
prediction_5_3355304_3355365_+_5p_1
prediction_5_4401223_4401280_+_3p_-3
prediction_5_4401223_4401280_+_3p_0
prediction_5_45031847_45031911_+_3p_13
prediction_5_45031847_45031911_+_3p_14
prediction_5_46644860_46644933_+_5p_-3
prediction_5_46644860_46644933_+_5p_-5
prediction_5_47634415_47634485_-_5p_-4
prediction_5_47634415_47634485_-_5p_-5
prediction_5_47634418_47634488_+_5p_-5
prediction_5_49347852_49347925_-_3p_-1
prediction_5_51141402_51141470_-_5p_-5
prediction_5_56509313_56509385_+_3p_3
prediction_5_56576894_56576966_+_3p_3
prediction_5_56966474_56966540_+_3p_-1
prediction_5_56966476_56966540_+_3p_-1
prediction_5_56966476_56966540_+_5p_-5
prediction_5_5766452_5766520_+_5p_-2
prediction_5_59234307_59234371_+_5p_-5
prediction_5_59255364_59255424_+_3p_15
prediction_5_59255364_59255424_+_3p_16
prediction_5_64913760_64913825_-_3p_3
prediction_5_64913760_64913825_-_3p_4
prediction_5_65447567_65447637_+_3p_-5
prediction_5_70495854_70495923_-_5p_-3
prediction_5_70495854_70495923_-_5p_-4
prediction_5_70495854_70495923_-_5p_-5
prediction_5_70902726_70902789_-_5p_-2
prediction_5_70902726_70902789_-_5p_-4
prediction_5_75093795_75093866_+_3p_-1
prediction_5_75093795_75093866_+_3p_-2
prediction_5_79878316_79878380_+_5p_0
prediction_5_79878316_79878380_+_5p_1
prediction_5_84517338_84517407_-_5p_-2
prediction_5_84517338_84517407_-_5p_-4
prediction_5_84517343_84517406_-_5p_-3
prediction_5_84517343_84517406_-_5p_-5
prediction_5_8723226_8723292_-_5p_2
prediction_5_8723226_8723292_-_5p_3
prediction_5_92143451_92143526_+_5p_-4
prediction_5_92143451_92143526_+_5p_-5
prediction_5_93536362_93536419_+_5p_-4
prediction_5_93536362_93536419_+_5p_-5
prediction_5_93677146_93677203_+_5p_-4
prediction_5_93677146_93677203_+_5p_-5
prediction_5_94180236_94180295_-_3p_-4
prediction_5_94180236_94180295_-_3p_-5
prediction_6_100309961_100310020_-_3p_2
prediction_6_100309961_100310020_-_3p_3
prediction_6_100396732_100396794_+_5p_-2
prediction_6_100396733_100396795_+_5p_-3
prediction_6_102617170_102617224_-_3p_10
prediction_6_102617170_102617224_-_3p_9
prediction_6_105029685_105029757_+_5p_-3
prediction_6_105029685_105029757_+_5p_-5
prediction_6_116276_116346_+_3p_12
prediction_6_116937926_116937990_-_3p_0
prediction_6_116937926_116937990_-_3p_1
prediction_6_11759822_11759890_-_5p_-5
prediction_6_11759823_11759891_+_3p_-5
prediction_6_118815202_118815269_+_3p_-3
prediction_6_118815202_118815269_+_3p_-4
prediction_6_119761655_119761718_+_5p_10
prediction_6_120173944_120174005_+_3p_3
prediction_6_121529229_121529290_-_3p_-5
prediction_6_121755223_121755295_+_3p_10
prediction_6_121755223_121755295_+_3p_9
prediction_6_122520652_122520717_-_5p_-4
prediction_6_122520652_122520717_-_5p_-5
prediction_6_123153252_123153326_-_3p_-2
prediction_6_13395614_13395682_+_5p_-3
prediction_6_13395614_13395682_+_5p_-5
prediction_6_19931648_19931715_-_3p_-5
prediction_6_22502695_22502753_+_3p_15
prediction_6_22502695_22502753_+_3p_16
prediction_6_22502695_22502753_+_5p_16
prediction_6_22502695_22502753_+_5p_6
prediction_6_22818982_22819040_+_3p_-4
prediction_6_22818982_22819040_+_3p_-5
prediction_6_24573357_24573422_-_3p_11
prediction_6_24573357_24573422_-_3p_12
prediction_6_24573357_24573422_-_3p_13
prediction_6_28139587_28139645_-_5p_2
prediction_6_28257443_28257508_-_5p_-4
prediction_6_28257443_28257508_-_5p_-5
prediction_6_30405200_30405270_+_5p_-2
prediction_6_30405200_30405270_+_5p_0
prediction_6_31783506_31783570_-_5p_-4
prediction_6_31783506_31783570_-_5p_-5
prediction_6_38746988_38747062_-_5p_14
prediction_6_38746988_38747062_-_5p_15
prediction_6_38746993_38747056_+_5p_16
prediction_6_38856807_38856881_-_5p_14
prediction_6_38856807_38856881_-_5p_15
prediction_6_38856812_38856875_+_5p_16
prediction_6_41110293_41110361_-_3p_-1
prediction_6_41110293_41110361_-_3p_1
prediction_6_41110293_41110361_-_3p_2
prediction_6_41110295_41110363_-_3p_-3
prediction_6_43017882_43017950_+_5p_-5
prediction_6_4662927_4662996_+_3p_1
prediction_6_47168088_47168158_+_3p_12
prediction_6_47168088_47168158_+_3p_13
prediction_6_47168089_47168155_+_3p_9
prediction_6_47168089_47168159_-_5p_-1
prediction_6_511127_511195_+_5p_3
prediction_6_52132126_52132197_-_5p_-5
prediction_6_55912247_55912317_+_3p_-3
prediction_6_55912250_55912316_+_3p_-4
prediction_6_56820715_56820783_+_5p_-4
prediction_6_56820715_56820783_+_5p_-5
prediction_6_56820716_56820784_-_3p_-4
prediction_6_56820716_56820784_-_3p_-5
prediction_6_57461485_57461557_-_5p_-4
prediction_6_57461485_57461557_-_5p_-5
prediction_6_58115097_58115157_+_3p_15
prediction_6_58115097_58115157_+_3p_16
prediction_6_58411266_58411337_-_5p_3
prediction_6_58411266_58411337_-_5p_5
prediction_6_62621148_62621214_-_3p_-4
prediction_6_62621148_62621214_-_3p_-5
prediction_6_66625018_66625094_-_5p_14
prediction_6_72818515_72818583_-_5p_-5
prediction_6_75709608_75709661_+_3p_-5
prediction_6_76723583_76723659_+_5p_14
prediction_6_76724242_76724304_+_5p_12
prediction_6_76726857_76726924_-_3p_-5
prediction_6_79167862_79167928_-_5p_-5
prediction_6_81969628_81969686_+_5p_-4
prediction_6_81969628_81969686_+_5p_-5
prediction_6_82565847_82565915_-_3p_-4
prediction_6_82565847_82565915_-_3p_-5
prediction_6_82565847_82565915_-_5p_-4
prediction_6_82565853_82565909_-_5p_-4
prediction_6_82565853_82565909_-_5p_-5
prediction_6_82637033_82637086_+_5p_-3
prediction_6_867574_867647_+_5p_-3
prediction_6_867574_867647_-_5p_-2
prediction_6_867574_867647_-_5p_-4
prediction_6_867577_867644_+_5p_-5
prediction_6_87871756_87871826_-_5p_-3
prediction_6_87871756_87871826_-_5p_-5
prediction_6_87871757_87871827_+_5p_-1
prediction_6_87871758_87871828_-_5p_-1
prediction_6_87871758_87871828_-_5p_-3
prediction_6_87871760_87871824_+_5p_-4
prediction_6_916808_916869_-_3p_3
prediction_6_916808_916869_-_3p_4
prediction_6_916808_916869_-_3p_5
prediction_6_93665078_93665135_+_3p_10
prediction_6_93665078_93665135_+_3p_11
prediction_6_94737182_94737239_+_5p_2
prediction_6_9699163_9699228_+_3p_-3
prediction_7_10120539_10120606_-_5p_10
prediction_7_10120539_10120606_-_5p_8
prediction_7_10120539_10120606_-_5p_9
prediction_7_10120542_10120603_-_3p_-4
prediction_7_10120542_10120603_-_3p_-5
prediction_7_10120542_10120603_-_5p_5
prediction_7_10120542_10120603_-_5p_6
prediction_7_10120542_10120603_-_5p_7
prediction_7_103260951_103261025_+_3p_1
prediction_7_103260953_103261025_+_3p_1
prediction_7_103260959_103261019_+_3p_-5
prediction_7_103620286_103620360_-_5p_-2
prediction_7_103620291_103620359_-_5p_-3
prediction_7_104202020_104202090_-_5p_-5
prediction_7_104418347_104418417_+_5p_-5
prediction_7_105005739_105005804_-_5p_-3
prediction_7_105005739_105005804_-_5p_-4
prediction_7_105005742_105005801_-_5p_-2
prediction_7_105005742_105005801_-_5p_0
prediction_7_105053127_105053199_+_3p_-4
prediction_7_105053127_105053199_+_3p_-5
prediction_7_114962274_114962333_-_3p_2
prediction_7_119600761_119600823_+_3p_-2
prediction_7_119600761_119600823_+_3p_-4
prediction_7_119600761_119600823_+_5p_-5
prediction_7_127132499_127132568_-_3p_-2
prediction_7_127132499_127132568_-_3p_2
prediction_7_129304040_129304114_-_5p_-3
prediction_7_129910892_129910956_+_3p_-5
prediction_7_130127325_130127389_-_3p_-5
prediction_7_14298404_14298465_-_5p_-2
prediction_7_14298404_14298465_-_5p_0
prediction_7_16149596_16149664_-_5p_-5
prediction_7_17801007_17801070_-_3p_10
prediction_7_17801007_17801070_-_3p_4
prediction_7_17801009_17801072_-_3p_2
prediction_7_17801009_17801072_-_3p_8
prediction_7_24491625_24491703_+_3p_4
prediction_7_25589219_25589293_+_3p_-3
prediction_7_25589219_25589293_+_3p_-4
prediction_7_26632744_26632813_-_5p_-2
prediction_7_26632744_26632813_-_5p_-4
prediction_7_26632746_26632815_-_5p_-2
prediction_7_26632746_26632815_-_5p_0
prediction_7_26784706_26784775_-_5p_-2
prediction_7_26784706_26784775_-_5p_-4
prediction_7_26784708_26784777_-_5p_-2
prediction_7_26784708_26784777_-_5p_0
prediction_7_27114681_27114750_+_5p_-3
prediction_7_27114681_27114750_+_5p_-5
prediction_7_3124652_3124709_+_3p_14
prediction_7_36127891_36127960_+_3p_-5
prediction_7_36940775_36940840_-_5p_-3
prediction_7_36940775_36940840_-_5p_-5
prediction_7_37330450_37330515_-_5p_-5
prediction_7_37330452_37330517_-_5p_-3
prediction_7_37330452_37330517_-_5p_-5
prediction_7_37733852_37733913_-_5p_15
prediction_7_37733852_37733913_-_5p_16
prediction_7_3857768_3857832_-_5p_2
prediction_7_41912865_41912927_-_3p_-2
prediction_7_41972359_41972422_-_5p_-4
prediction_7_41972359_41972422_-_5p_-5
prediction_7_45621881_45621949_+_5p_-4
prediction_7_45621881_45621949_+_5p_-5
prediction_7_56020910_56020968_+_5p_-4
prediction_7_56020910_56020968_+_5p_-5
prediction_7_56058171_56058236_-_5p_-5
prediction_7_59621777_59621852_-_5p_-5
prediction_7_66208782_66208841_-_3p_-4
prediction_7_66208782_66208841_-_3p_-5
prediction_7_66651551_66651618_-_5p_-4
prediction_7_66651551_66651618_-_5p_-5
prediction_7_66651553_66651620_-_5p_-4
prediction_7_66651553_66651620_-_5p_-5
prediction_7_66764852_66764919_+_5p_-4
prediction_7_66764852_66764919_+_5p_-5
prediction_7_68411759_68411829_+_3p_-2
prediction_7_70873146_70873218_+_5p_-5
prediction_7_74055795_74055865_+_3p_12
prediction_7_74055795_74055865_+_5p_-3
prediction_7_74055795_74055865_+_5p_-4
prediction_7_74055795_74055865_+_5p_-5
prediction_7_74055795_74055867_+_3p_14
prediction_7_74474082_74474155_+_3p_14
prediction_7_74474082_74474155_+_3p_16
prediction_7_80548894_80548957_-_3p_-3
prediction_7_80548894_80548957_-_3p_-4
prediction_7_80897887_80897954_+_5p_-5
prediction_7_80897892_80897949_+_5p_-5
prediction_7_80897892_80897949_+_5p_1
prediction_7_83078911_83078976_+_5p_-4
prediction_7_84918647_84918711_+_5p_-3
prediction_7_84918647_84918711_+_5p_-5
prediction_7_86652673_86652733_-_3p_-1
prediction_7_86652673_86652733_-_3p_0
prediction_7_86652673_86652733_-_3p_1
prediction_7_88174800_88174854_+_5p_10
prediction_7_88174800_88174854_+_5p_9
prediction_7_91732076_91732132_+_5p_-5
prediction_7_93186234_93186301_+_5p_-4
prediction_7_93186234_93186301_+_5p_-5
prediction_7_98478017_98478075_-_5p_4
prediction_8_104609832_104609905_-_5p_1
prediction_8_104609832_104609905_-_5p_2
prediction_8_104609837_104609900_-_5p_-3
prediction_8_104609837_104609900_-_5p_-4
prediction_8_104609839_104609902_-_3p_3
prediction_8_104609839_104609902_-_5p_-1
prediction_8_104609839_104609902_-_5p_-2
prediction_8_104758591_104758648_-_3p_-5
prediction_8_107374691_107374757_-_3p_-4
prediction_8_107374691_107374757_-_3p_-5
prediction_8_107374693_107374759_-_3p_-4
prediction_8_107374693_107374759_-_3p_-5
prediction_8_108430837_108430911_+_5p_-1
prediction_8_108430837_108430911_+_5p_-5
prediction_8_111997436_111997496_-_5p_0
prediction_8_116722771_116722839_-_5p_-2
prediction_8_116722771_116722839_-_5p_-3
prediction_8_117536846_117536903_-_5p_2
prediction_8_117536848_117536905_-_5p_4
prediction_8_117825592_117825652_-_5p_10
prediction_8_117825592_117825652_-_5p_11
prediction_8_13375547_13375616_-_3p_15
prediction_8_13375547_13375616_-_3p_16
prediction_8_21385607_21385668_+_5p_13
prediction_8_26929228_26929300_-_5p_-4
prediction_8_26929231_26929297_-_5p_-4
prediction_8_26929231_26929297_-_5p_-5
prediction_8_26929233_26929299_-_5p_-4
prediction_8_26929233_26929299_-_5p_-5
prediction_8_27582934_27582999_+_5p_-5
prediction_8_27843808_27843877_-_3p_-2
prediction_8_27843808_27843877_-_3p_-3
prediction_8_27843808_27843877_-_5p_-4
prediction_8_27843808_27843877_-_5p_-5
prediction_8_27843809_27843880_-_3p_-3
prediction_8_27843809_27843880_-_3p_-4
prediction_8_27992845_27992908_+_5p_-3
prediction_8_31598789_31598858_-_3p_-5
prediction_8_33182072_33182138_-_5p_-4
prediction_8_34188286_34188348_+_3p_11
prediction_8_34562385_34562444_+_3p_13
prediction_8_35307724_35307794_-_5p_-1
prediction_8_35307729_35307789_-_5p_-4
prediction_8_35307729_35307789_-_5p_-5
prediction_8_35307731_35307787_-_5p_-5
prediction_8_35307733_35307789_-_5p_-4
prediction_8_35307733_35307789_-_5p_-5
prediction_8_37871241_37871311_-_5p_3
prediction_8_37871241_37871311_-_5p_5
prediction_8_37871246_37871310_-_5p_2
[truncated: 122 more rows]

## Sheet: Table E 5'-end Significance 58%
Table ST3. Responding probes in the experiments for the identification of the 5'-end of miRNAs
miRNA Name_Chromosome_Start-pre-miRNA_Stop-pre-miRNA_Strand_Arm-of-the-pre-miRNA_Probe-shift
ENSSSCT00000019919_9_47573177_47573238_-_5p_-1
ENSSSCT00000019919_9_47573177_47573238_-_5p_0
ENSSSCT00000019919_9_47573177_47573238_-_5p_1
ENSSSCT00000020113_12_45319038_45319123_+_3p_13
ENSSSCT00000020217_7_29626545_29626654_+_3p_1
ENSSSCT00000020217_7_29626545_29626654_+_3p_2
ENSSSCT00000020217_7_29626545_29626654_+_3p_3
ENSSSCT00000020238_7_63697110_63697262_-_3p_1
ENSSSCT00000020238_7_63697110_63697262_-_3p_4
ENSSSCT00000020741_6_45615061_45615125_+_3p_14
ENSSSCT00000020912_9_47702717_47702798_-_5p_13
ENSSSCT00000020912_9_47702717_47702798_-_5p_9
ENSSSCT00000021051_10_26149017_26149077_-_3p_0
ENSSSCT00000021051_10_26149017_26149077_-_3p_1
ENSSSCT00000021314_1_280335864_280335953_+_5p_11
ENSSSCT00000021314_1_280335864_280335953_+_5p_12
ENSSSCT00000021314_1_280335864_280335953_+_5p_15
ENSSSCT00000021434_13_130664293_130664374_+_5p_8
ENSSSCT00000021434_13_130664293_130664374_+_5p_9
ENSSSCT00000021537_15_77060695_77060796_+_5p_14
ENSSSCT00000021537_15_77060695_77060796_+_5p_15
ENSSSCT00000021537_15_77060695_77060796_+_5p_16
ENSSSCT00000021610_10_9750910_9750994_-_5p_14
ENSSSCT00000021610_10_9750910_9750994_-_5p_15
bta-mir-23b_10_26149017_26149077_-_3p_0
bta-mir-23b_10_26149017_26149077_-_3p_1
bta-mir-2483_X_100547915_100547995_-_5p_10
bta-mir-2483_X_100547915_100547995_-_5p_9
cfa-mir-22_12_45319052_45319112_+_3p_-1
dre-mir-92a-1_11_60973153_60973238_+_3p_0
eca-mir-125b_9_47573164_47573252_-_5p_14
eca-mir-125b_9_47654244_47654332_-_5p_14
eca-mir-769_6_36259103_36259182_-_3p_-2
eca-mir-769_6_36259103_36259182_-_3p_3
ggo-mir-23a_2_56861158_56861231_-_3p_6
ggo-mir-23a_2_56861158_56861231_-_3p_7
ggo-mir-99a_13_130664293_130664374_+_5p_8
ggo-mir-99a_13_130664293_130664374_+_5p_9
hsa-mir-181b-2_1_280335864_280335953_+_5p_11
hsa-mir-181b-2_1_280335864_280335953_+_5p_12
hsa-mir-181b-2_1_280335864_280335953_+_5p_15
mmu-mir-2140_6_250418_250472_-_3p_-5
mmu-mir-2144_6_250938_251009_-_3p_4
mmu-mir-2144_6_250938_251009_-_3p_5
mmu-mir-685_7_84990474_84990583_+_5p_11
oan-mir-100_9_47702717_47702798_-_5p_9
oan-mir-208_7_82117406_82117517_-_3p_0
prediction_10_1214017_1214068_+_5p_-1
prediction_10_1214017_1214068_+_5p_12
prediction_10_1347056_1347119_+_3p_14
prediction_10_1347056_1347119_+_3p_15
prediction_10_1347056_1347119_+_3p_8
prediction_10_1461106_1461164_+_5p_15
prediction_10_61765141_61765215_-_5p_-3
prediction_10_61765141_61765215_-_5p_-4
prediction_10_61765141_61765215_-_5p_-5
prediction_11_10552862_10552920_-_3p_10
prediction_11_49786985_49787044_-_5p_-3
prediction_11_49786985_49787044_-_5p_-4
prediction_12_12927873_12927940_+_5p_-1
prediction_12_12927873_12927940_+_5p_-2
prediction_12_38319735_38319807_+_5p_-5
prediction_12_38319738_38319804_+_5p_-4
prediction_12_50934352_50934423_+_5p_-3
prediction_12_50934352_50934423_+_5p_-4
prediction_12_50934352_50934423_+_5p_-5
prediction_12_51048254_51048325_+_5p_-3
prediction_13_101923385_101923448_-_5p_-3
prediction_13_101923385_101923448_-_5p_-4
prediction_13_101923385_101923448_-_5p_-5
prediction_13_101923389_101923448_-_5p_-3
prediction_13_101923389_101923448_-_5p_-4
prediction_13_101923389_101923448_-_5p_-5
prediction_13_104082811_104082865_-_3p_3
prediction_13_104798802_104798869_-_3p_1
prediction_13_38492736_38492795_-_3p_7
prediction_13_60423431_60423501_-_5p_-4
prediction_13_60423431_60423501_-_5p_-5
prediction_14_118326581_118326649_-_3p_10
prediction_14_118326581_118326649_-_3p_3
prediction_14_118326581_118326649_-_3p_8
prediction_14_118411980_118412048_+_3p_10
prediction_14_118411980_118412048_+_3p_3
prediction_14_118411980_118412048_+_3p_8
prediction_14_21804679_21804751_-_5p_1
prediction_14_21804681_21804753_-_5p_3
prediction_14_38964301_38964366_-_5p_-3
prediction_14_74108455_74108526_-_5p_-1
prediction_14_74108455_74108526_-_5p_2
prediction_14_74108455_74108526_-_5p_4
prediction_14_74108461_74108528_-_5p_4
prediction_14_74108461_74108528_-_5p_6
prediction_14_74283236_74283305_-_5p_-5
prediction_14_74283236_74283305_-_5p_0
prediction_15_102137942_102138020_-_5p_-3
prediction_15_102137942_102138020_-_5p_-4
prediction_15_102137942_102138020_-_5p_-5
prediction_15_120842712_120842780_+_3p_-1
prediction_15_120842712_120842780_+_3p_-3
prediction_15_120842712_120842780_+_3p_-4
prediction_15_123923041_123923099_+_5p_9
prediction_15_45992399_45992475_-_5p_-3
prediction_15_45992399_45992475_-_5p_-4
prediction_15_45992399_45992475_-_5p_-5
prediction_15_49169424_49169495_-_5p_11
prediction_15_49169424_49169495_-_5p_8
prediction_15_49169424_49169495_-_5p_9
prediction_15_53410691_53410756_-_5p_2
prediction_15_53410691_53410756_-_5p_4
prediction_15_53410693_53410758_-_5p_4
prediction_15_53410693_53410758_-_5p_6
prediction_15_53410693_53410758_-_5p_7
prediction_16_68474541_68474601_+_5p_1
prediction_16_68474541_68474601_+_5p_3
prediction_16_68474541_68474601_+_5p_4
prediction_17_11369635_11369703_-_3p_-2
prediction_18_12026446_12026500_-_3p_-2
prediction_18_12026446_12026500_-_3p_-3
prediction_18_12026446_12026500_-_3p_-5
prediction_18_19087461_19087525_+_5p_-2
prediction_18_19087461_19087525_+_5p_-5
prediction_1_100385836_100385893_+_3p_-2
prediction_1_100385836_100385893_+_3p_-5
prediction_1_161454224_161454283_-_5p_7
prediction_1_161454224_161454283_-_5p_9
prediction_1_161520978_161521037_-_5p_7
prediction_1_161520978_161521037_-_5p_9
prediction_1_163939720_163939787_+_5p_-3
prediction_1_183180599_183180669_-_5p_-5
prediction_1_183180599_183180669_-_5p_1
prediction_1_183180601_183180671_-_5p_-3
prediction_1_183180601_183180671_-_5p_3
prediction_1_187583640_187583700_+_5p_3
prediction_1_187974497_187974559_+_5p_-3
prediction_1_230202271_230202332_-_3p_-3
prediction_1_245536575_245536645_+_3p_1
prediction_1_270536219_270536281_-_3p_1
prediction_1_95733446_95733501_+_3p_5
prediction_1_95733446_95733501_+_3p_6
prediction_1_95733446_95733501_+_3p_7
prediction_2_105059087_105059157_+_5p_0
prediction_2_105059889_105059959_+_5p_0
prediction_2_127541820_127541874_+_5p_10
prediction_2_127541820_127541874_+_5p_11
prediction_2_127541820_127541874_+_5p_12
prediction_2_45368971_45369032_-_5p_-3
prediction_2_59627576_59627636_+_5p_1
prediction_2_59627576_59627636_+_5p_2
prediction_2_59627576_59627638_-_5p_4
prediction_2_63592179_63592232_+_3p_-2
prediction_2_63592179_63592232_+_3p_0
prediction_2_66954087_66954151_+_5p_-5
prediction_2_6897256_6897329_-_5p_-2
prediction_2_6897256_6897329_-_5p_-3
prediction_2_6897256_6897329_-_5p_0
prediction_2_90416882_90416945_+_5p_0
prediction_3_104392561_104392629_+_5p_-3
prediction_3_104392561_104392629_+_5p_-4
prediction_3_10575886_10575947_-_5p_-3
prediction_3_12550610_12550675_-_3p_-4
prediction_3_12550610_12550675_-_3p_-5
prediction_3_13796506_13796580_+_5p_-3
prediction_3_13796506_13796580_+_5p_-5
prediction_3_13796506_13796582_+_5p_-3
prediction_3_41035254_41035320_+_3p_1
prediction_3_41035254_41035320_+_3p_2
prediction_3_69853301_69853358_-_5p_7
prediction_3_94477472_94477543_+_3p_-1
prediction_3_94477472_94477543_+_3p_-4
prediction_4_117964212_117964278_+_3p_-2
prediction_4_117964212_117964278_+_3p_-3
prediction_4_122479283_122479357_-_5p_-4
prediction_4_122479283_122479357_-_5p_-5
prediction_4_122479286_122479354_-_5p_-1
prediction_4_19508602_19508665_-_3p_1
prediction_4_19508602_19508665_-_3p_2
prediction_4_53073009_53073074_-_3p_3
prediction_4_57750575_57750646_-_5p_-3
prediction_4_72352574_72352642_+_5p_10
prediction_4_72352574_72352642_+_5p_14
prediction_4_7744932_7744990_+_3p_-2
prediction_4_7744932_7744990_+_3p_3
prediction_4_98667652_98667714_+_5p_-1
prediction_5_20586016_20586081_-_5p_-1
prediction_5_20586016_20586081_-_5p_0
prediction_5_20586016_20586081_-_5p_1
prediction_5_20586017_20586080_-_5p_-1
prediction_5_20586017_20586080_-_5p_-2
prediction_5_20586017_20586080_-_5p_0
prediction_5_3472467_3472536_-_3p_9
prediction_5_70902720_70902795_+_5p_8
prediction_5_84640892_84640963_+_5p_3
prediction_5_91342599_91342669_-_3p_-5
prediction_6_105029688_105029754_+_5p_-3
prediction_6_11759823_11759891_+_5p_-3
prediction_6_120174500_120174560_+_3p_7
prediction_6_29188464_29188533_+_5p_-3
prediction_6_29188464_29188533_+_5p_-4
prediction_6_31701852_31701920_+_3p_13
prediction_6_57577173_57577243_+_5p_-2
prediction_6_57577173_57577243_+_5p_-5
prediction_7_105005742_105005801_-_3p_2
prediction_7_49629581_49629652_+_5p_-4
prediction_7_49629581_49629652_+_5p_-5
prediction_7_52007538_52007603_+_5p_-1
prediction_7_52007538_52007603_+_5p_0
prediction_7_6185956_6186018_-_3p_11
prediction_7_6185956_6186018_-_3p_14
prediction_7_6185956_6186018_-_3p_15
prediction_7_6185956_6186018_-_3p_16
prediction_7_80136422_80136476_-_3p_9
prediction_7_80897884_80897957_-_5p_4
prediction_8_109002383_109002443_-_3p_1
prediction_8_109002383_109002443_-_3p_7
prediction_8_26929230_26929302_-_5p_-2
prediction_8_29373598_29373658_-_3p_-1
prediction_8_29373598_29373658_-_5p_-4
prediction_8_867083_867151_-_3p_0
prediction_9_101707007_101707070_-_5p_3
prediction_9_10346721_10346793_+_5p_-4
prediction_9_109044654_109044721_+_5p_-3
prediction_9_128315695_128315756_-_3p_-1
prediction_9_128315695_128315756_-_3p_-3
prediction_9_128315695_128315756_-_3p_-5
prediction_9_41220956_41221028_+_5p_-1
prediction_9_7042621_7042681_-_3p_-3
prediction_9_7042621_7042681_-_3p_-5
prediction_9_70638416_70638474_+_5p_16
prediction_9_71879411_71879475_+_5p_4
prediction_X_115373839_115373896_-_5p_15
prediction_X_12111301_12111375_+_5p_-3
prediction_X_12111301_12111375_+_5p_-4
prediction_X_15459204_15459271_+_5p_-2
prediction_X_15459204_15459271_+_5p_0
prediction_X_15459207_15459270_+_5p_-3
prediction_X_15459207_15459270_+_5p_-5
prediction_X_99152807_99152872_-_5p_-5
ssc-mir-210_2_331305_331381_+_5p_7
ssc-mir-210_2_331305_331381_+_5p_8
ssc-mir-210_2_331305_331381_+_5p_9
