# Supplementary material for: Tissue-Specific Expression and Regulatory Networks of Pig MicroRNAome
Source: PLoS One. 2014 Apr 3;9(4):e89755. doi: 10.1371/journal.pone.0089755 (PMC3974652; doi:10.1371/journal.pone.0089755)
Supplement: Table S7 — Interaction network. (XLS) [file pone.0089755.s007.xls]

## Sheet: Table-S7.sif
Table S7. Interaction networks indicating node 1, node 2 and interacion type (pp = protein protein derived and mi = miRNA/target)
node 1	interaction	node 2
MARCH2
SEPT1	pp	SEPT1
SEPT1	pp	SEPT6
SEPT1	pp	TOLLIP
SEPT2	pp	SEPT6
SEPT2	pp	DAZAP2
SEPT2	pp	ISG15
SEPT8
SEP15	mi	ENSSSCT00000020382_4_97900883_97900965_-_3p
SEP15	mi	ENSSSCT00000021054_1_227255281_227255372_-_3p_2
SEP15	mi	ENSSSCT00000021054_1_227255281_227255372_-_3p_3
SEP15	mi	mmu-mir-101b_1_227255281_227255378_-_3p_2
SEP15	mi	mmu-mir-101b_1_227255281_227255378_-_3p_3
1700112E06Rik	mi	antisense-ssc-mir-739_6_250392_250483_-_NA
AARS2	mi	prediction_12_12927873_12927940_+_5p
AATF	pp	MAPT
AATF	pp	PAWR
AATF	pp	RBL2
ABCC2	pp	Rdx
ABCC2	pp	SLC9A3R1
ABCC8
ABCE1	pp	RNASEL
ABCF3	pp	ACIN1
ABCF3	pp	C11orf59
ABCF3	pp	DNALI1
ABCG5	pp	ABCG8
ABCG5	mi	cfa-mir-138a_13_23336889_23336951_+_3p
ABCG5	mi	ENSSSCT00000021566_13_23336889_23336951_+_3p
ABCG5	mi	prediction_11_31094300_31094365_+_3p
ABCG5	mi	prediction_14_110219096_110219158_-_5p
ABI1	pp	ABL1
ABI1	pp	ENAH
ABI1	pp	EPS8
ABI1	pp	NCK1
ABI2	pp	ABL1
ABI2	pp	IFT20
ABI2	pp	TRIM32
ABL1	pp	ABI1
ABL1	pp	ABI2
ABL1	pp	ABL1
ABL1	pp	BCAR1
ABL1	pp	CAT
ABL1	pp	CRKL
ABL1	pp	DOK1
ABL1	pp	EVL
ABL1	pp	GPX1
ABL1	pp	GRB10
ABL1	pp	GRB2
ABL1	pp	HCK
ABL1	pp	INPPL1
ABL1	pp	JAK1
ABL1	pp	NCK1
ABL1	pp	NTRK1
ABL1	pp	PAG1
ABL1	pp	RAD9A
ABL1	pp	RFX1
ABL1	pp	SHC1
ABL1	pp	SHE
ABL1	pp	SPTA1
ABL1	pp	SRC
ABL1	pp	VAV1
ABL1	pp	YTHDC1
ABLIM1	pp	HOOK2
ABLIM1	pp	VIM
ABTB2	pp	CUL3
ABTB2	pp	DNTT
ABTB2	pp	EEF1A1
ABTB2	pp	RBX1
ACADM
ACAN	pp	FBLN2
ACAP1
ACAT1
ACCN1	pp	ACCN3
ACCN3	pp	GOPC
ACCS	pp	ACCS
ACTA2	pp	CCT4
ACTA2	pp	CCT5
ACTB	pp	ACTB
ACTB	pp	CCT2
ACTB	pp	Cct5
ACTB	pp	CCT5
ACTB	pp	Cct6a
ACTB	pp	CFL2
ACTB	pp	DSTN
ACTB	pp	NCALD
ACTB	pp	NCF1
ACTB	pp	NCF2
ACTB	pp	RAC1
ACTB	pp	RAC2
ACTB	pp	SSH2
ACTL6A	pp	EWSR1
ACTL6A	pp	KAT5
ACTL6A	pp	RUVBL1
ACTL6A	pp	TRRAP
ACTL6B
ACTR1A	pp	NUMA1
ACTR3	pp	ARPC1B
ACTR3	pp	ARPC3
ACTR3	pp	ARPC4
ACTR3	pp	CTTN
ACTR3	mi	ENSSSCT00000020485_7_133847437_133847512_+_3p
ACTR3	mi	hsa-mir-370_7_133847437_133847512_+_3p
ACTR3B	pp	ARPC1A
ACTR3B	pp	ARPC1B
ACTR3B	pp	ARPC3
ACTR3B	pp	ARPC4
ACTR3B	pp	ARPC5
ACTR3B	pp	CDK4
ACTR3B	pp	KIAA1967
ACVR2A	pp	BMP6
ACVR2A	pp	INHA
ACVR2A	pp	INHBA
ACVR2A	pp	MAGI2
ACVR2A	pp	SYNJ2BP
ACVR2B	pp	BMP6
ACVR2B	pp	MSTN
ACY1	pp	ACY1
ACY1	pp	TTC1
ADA	pp	ADORA2A
ADA	pp	DRD1
ADA	pp	NR3C1
ADAM10	mi	cfa-mir-138a_13_23336889_23336951_+_3p
ADAM10	mi	ENSSSCT00000021566_13_23336889_23336951_+_3p
ADAM10	pp	GRB2
ADAM10	pp	MAD2L1
ADAM15	pp	GRB2
ADAM15	pp	HCK
ADAM15	pp	MAD2L1
ADAM15	pp	SH3GL2
ADAM15	pp	SNX9
ADAM22
ADAM8
ADAMTSL4	pp	DLK2
ADAMTSL4	pp	KRTAP4-12
ADAP1	pp	CSNK1A1
ADAP1	pp	NCL
ADAP1	pp	PRKD1
ADAR	pp	XPO1
ADCK2	mi	ssc-mir-16_11_17603121_17603199_+_NA
ADD1	pp	CALM1
ADD1	pp	HDAC1
ADD1	pp	ID2
ADD1	pp	ID3
ADD1	pp	SIN3A
ADD1	pp	SMARCA4
ADD1	pp	SMARCC1
ADH5	pp	ADH5
ADH5	pp	CHD3
ADNP2
ADORA2A	pp	ADORA2A
ADORA2A	pp	DRD2
ADPRHL2	mi	ENSSSCT00000021054_1_227255281_227255372_-_3p_2
ADPRHL2	mi	ENSSSCT00000021054_1_227255281_227255372_-_3p_3
ADPRHL2	mi	mmu-mir-101b_1_227255281_227255378_-_3p_2
ADPRHL2	mi	mmu-mir-101b_1_227255281_227255378_-_3p_3
ADRB1	pp	GIPC1
ADRB2	pp	ADRB2
ADRB2	pp	ADRBK1
ADRB2	pp	AKAP12
ADRB2	pp	GRB2
ADRB2	pp	SLC9A3R1
ADRB2	pp	SLC9A3R2
ADRB2	pp	SRC
ADRB3	pp	SRC
ADRBK1	pp	GNA15
ADRBK1	pp	PDC
ADRBK1	pp	PDCL
ADRBK1	pp	PRKCB
ADRBK1	pp	RHO
ADRBK1	pp	SNCB
ADRBK1	pp	SNCG
ADRBK1	pp	SRC
ADRBK2	pp	CXCR4
ADRM1	pp	PSMD2
ADRM1	pp	PSMD4
ADRM1	pp	UCHL5
ADSS	mi	antisense-ssc-mir-144_12_42820921_42820986_-_NA
ADSSL1	mi	prediction_6_47168088_47168158_+_3p
AES	pp	AES
AES	pp	HMGB1
AES	pp	PTRH2
AES	pp	RELA
AFF1
AFF4	pp	CDK9
AFP
AGA	pp	AGA
AGER
AGFG1	pp	EPS15
AGFG2	pp	EPS15
AGPAT4	mi	ssc-mir-23b-longer/ssc-isomir-23b_10_26149010_26149089_-_NA
AGPS	pp	GNPAT
AGRP
AGT	pp	EWSR1
AGTR1A	mi	prediction_2_127541820_127541874_+_5p
AGTR1A	mi	prediction_6_22502695_22502753_+_5p
AGTR1A	mi	ssc-mir-181a-shorter/ssc-isomir-181a_10_22839352_22839455_-_NA
AGTR2	pp	AGTRAP
AGTRAP	pp	AGTRAP
AGTRAP	pp	GNB2L1
AHCY
AHSA2
AIFM1	pp	SETDB1
AIG1	mi	ENSSSCT00000020150_12_34201564_34201656_+_5p
AIG1	mi	gga-mir-21_12_34201564_34201661_+_5p
AIMP1
AIMP2	pp	AIMP2
AIMP2	pp	C19orf57
AIMP2	pp	DARS2
AIMP2	pp	HSPA4
AIMP2	pp	IARS
AIMP2	pp	KARS
AIMP2	pp	LNX1
AIMP2	pp	PARK2
AIMP2	pp	QARS
AIMP2	pp	STUB1
AK2
AKAP12	pp	PRKAR2A
AKAP13	mi	ENSSSCT00000020296_2_136265608_136265674_+_3p
AKAP13	pp	ESR1
AKAP13	mi	prediction_6_47168088_47168158_+_3p
AKAP13	pp	RHOA
AKAP13	pp	RXRB
AKAP13	mi	ssc-mir-378_2_136265603_136265682_+_NA
AKAP2	pp	PRKAR2A
AKAP5	pp	Gria1
AKAP5	pp	PRKAR2B
AKAP6	pp	PDE4A
AKAP8	pp	DDX5
AKAP8	pp	MCM2
AKAP8	pp	PRKAR2A
AKAP8L	pp	EMD
AKAP8L	pp	RNF43
AKAP9	pp	CALM1
AKAP9	pp	CSNK1E
AKAP9	pp	FNBP1
AKAP9	pp	PKN1
AKAP9	pp	PRKAR2A
AKAP9	pp	TRIP10
AKIRIN2	pp	LNX1
AKT1	pp	Akt2
AKT1	pp	AKTIP
AKT1	pp	ARHGAP29
AKT1	pp	BAD
AKT1	pp	CDKN1B
AKT1	pp	CHUK
AKT1	pp	GSK3B
AKT1	pp	ILK
AKT1	pp	IMPDH2
AKT1	pp	KRT10
AKT1	pp	KTN1
AKT1	pp	MAPK14
AKT1	pp	MAPK8IP1
AKT1	pp	MTCP1
AKT1	pp	NPM1
AKT1	pp	NR4A1
AKT1	pp	PAK1
AKT1	pp	PAK6
AKT1	pp	PDPK1
AKT1	pp	PIAS2
AKT1	pp	PKN2
AKT1	pp	SMARCB1
AKT1	pp	SMARCC1
AKT1	pp	SMARCC2
AKT1	pp	STUB1
AKT1	pp	TCL1B
AKT1	pp	TSC1
AKT1	pp	TSC2
AKT1	pp	YWHAZ
AKT2	pp	APPL1
AKT2	pp	CHUK
AKT2	pp	MTCP1
AKT2	pp	SH3RF1
AKT2	pp	TCL1B
AKTIP	pp	MARCH5
AKTIP	pp	AKT1
AKTIP	pp	ASS1
AKTIP	pp	DZIP3
AKTIP	pp	GTF3C1
AKTIP	pp	HDLBP
AKTIP	pp	IARS
AKTIP	pp	PDS5A
AKTIP	pp	POLA2
AKTIP	pp	TIMM50
ALB	pp	FCGRT
ALCAM	pp	CD6
ALDH1A1	pp	ALDH1A1
ALDH2	pp	C14orf1
ALDH2	pp	CRMP1
ALDH2	pp	HSPD1
ALDH2	pp	HSPE1
ALDH2	pp	IGSF21
ALDH2	pp	UNC119
ALDH5A1
ALDH7A1
ALG8	mi	ENSSSCT00000020382_4_97900883_97900965_-_3p
ALOX12	pp	LMNA
ALS2CR12
AMBP	pp	ALB
AMBP	pp	AMBP
AMBP	pp	CD79A
AMBP	pp	FN1
AMBRA1	pp	ATG3
AMBRA1	pp	ATG4B
AMBRA1	pp	CUL4A
AMBRA1	pp	CUL4B
AMBRA1	pp	DDB1
AMBRA1	pp	MAP1B
AMD1	pp	AMD1
AMIGO1	pp	AMIGO1
AMIGO1	pp	AMIGO2
AMIGO2	pp	AMIGO1
AMIGO2	pp	AMIGO2
AMOT	pp	AMOTL1
AMOT	pp	BAG3
AMOT	pp	FOXK1
AMOT	pp	FOXK2
AMOT	pp	LIN7A
AMOT	pp	LIN7C
AMOT	pp	LONP2
AMOT	pp	MPDZ
AMOT	pp	SCLT1
AMOT	pp	USP11
AMOT	pp	YAP1
ANAPC2	pp	ANAPC5
ANAPC2	pp	CREBBP
ANAPC5	pp	FZR1
ANAPC5	pp	PABPC1
ANAPC5	pp	ZBTB16
ANK3	pp	KCNC1
ANK3	mi	prediction_6_47168088_47168158_+_3p
ANKHD1	mi	prediction_1_191689912_191689974_+_3p
ANKHD1	mi	prediction_5_93536362_93536419_+_5p
ANKHD1	mi	prediction_5_93677146_93677203_+_5p
ANKHD1	mi	prediction_9_4004042_4004108_+_3p
ANKRA2
ANKRD12	mi	prediction_9_37494321_37494385_-_3p
ANKRD24	pp	C1orf103
ANKRD24	pp	EEF1A1
ANKRD24	pp	UNC119
ANKRD32	mi	ssc-mir-16_11_17603121_17603199_+_NA
ANKRD55
ANKRD6	pp	CSNK1E
ANKRD6	pp	GSK3B
ANP32B
ANP32E
ANXA1	pp	S100A11
ANXA11	pp	PDCD6
ANXA11	pp	PLSCR1
ANXA11	pp	S100A6
ANXA2	pp	CTSB
ANXA2	pp	PLAT
ANXA2	pp	STAT6
ANXA7	pp	SRI
AOX1	mi	antisense-ssc-mir-144_12_42820921_42820986_-_NA
AP1B1	pp	AP1M1
AP1B1	pp	AP2M1
AP1B1	pp	ARF1
Ap1b1
AP1M1	pp	FXR2
AP1M1	pp	ZBTB8A
AP1S2
AP2B1	pp	AP1M1
AP2B1	pp	AP1M2
AP2B1	pp	AP2M1
AP2B1	pp	ARRB2
AP2B1	pp	BUB1B
AP2B1	pp	FAM46C
AP2B1	pp	LDLRAP1
AP2B1	pp	MEA1
AP2B1	pp	MLH1
AP2B1	pp	NECAP2
AP2B1	pp	TERF2IP
AP2B1	pp	THAP1
AP2M1	pp	FXR2
AP2M1	pp	MED4
AP2M1	pp	TBC1D5
AP2M1	pp	ZBTB8A
Ap2m1
AP2S1
AP3B1	pp	ARF5
AP3B1	pp	ARF6
AP3D1
AP3S1	pp	IRS1
AP4E1	pp	AP4S1
AP4M1	pp	AP4E1
APBA1	pp	APP
APBA1	pp	CCS
APBA2	pp	APP
APBA2	pp	NECAB3
APBA2	pp	RELA
APBB1	pp	APLP1
APBB1	pp	APLP2
APBB1	pp	APP
APBB1	pp	EVL
APBB1	pp	HDAC1
APBB1IP
APBB2	pp	APP
APBB3	pp	APLP1
APBB3	pp	APLP2
APBB3	pp	APP
APBB3	mi	prediction_2_12972059_12972118_-_5p
APCS	pp	APCS
APCS	pp	FCGR3B
APEH	pp	APEH
APEX1	pp	HIF1A
APEX1	pp	TCF21
APEX1	pp	XRCC5
APH1A	pp	NCSTN
APH1A	pp	PSEN1
APH1A	pp	PSEN2
APH1A	pp	PSENEN
APIP	pp	APIP
APIP	pp	LNX1
APIP	pp	NUDT18
APLP2	mi	prediction_9_37494321_37494385_-_3p
APOA1	mi	antisense-ssc-mir-144_12_42820921_42820986_-_NA
APOA1	pp	APOA1
APOA1	pp	APOC1
APOA1	pp	LCAT
APOA1	pp	PLTP
APOA1	mi	ssc-mir-185_14_52703712_52703787_+_NA
APOA1BP	pp	APOA1
APOA2	mi	ENSSSCT00000020296_2_136265608_136265674_+_3p
APOA2	pp	PLTP
APOA2	mi	ssc-mir-378_2_136265603_136265682_+_NA
APOB	pp	HSP90B1
APOB	pp	LIPC
APOB	pp	PPIB
APOE	pp	PLTP
APOF	pp	APOA1
APOF	pp	APOA2
APP	pp	ACHE
APP	pp	APBA1
APP	pp	APBA2
APP	pp	APBB1
APP	pp	CAV1
APP	pp	COL25A1
APP	pp	FBLN1
APP	pp	HSD17B10
APP	pp	SHC1
APP	pp	SNCB
APPL1	pp	AKT2
APPL1	pp	HDAC1
APPL1	pp	HDAC2
APPL1	pp	MTA2
APPL1	pp	RBBP4
APPL1	pp	RBBP7
APPL1	pp	RUVBL2
AQP1	pp	KRTAP4-12
AQP1	pp	MDFI
AQP1	pp	TRIP6
AQP3	pp	CAV1
AQP5	pp	MDFI
ARAP3	mi	ENSSSCT00000020330_6_39533215_39533285_+_3p
ARAP3	mi	hsa-mir-99b_6_39533215_39533285_+_3p
ARAP3	mi	prediction_9_37494321_37494385_-_3p
ARF1	pp	AP4E1
ARF1	pp	AP4M1
ARF1	pp	ARF1
ARF1	pp	ARFIP1
ARF1	pp	CHRM3
ARF1	pp	COPB1
ARF1	pp	COPE
ARF1	pp	EEF1G
ARF1	pp	KDELR1
ARF1	pp	WBP11
ARF5	pp	ARFIP1
ARF6	pp	CHRM3
ARF6	pp	DHPS
ARF6	pp	DYNC1H1
ARF6	pp	EIF6
ARF6	pp	EXOC5
ARF6	pp	IQGAP1
ARF6	pp	KIAA0368
ARF6	pp	LRPPRC
ARF6	pp	PIP5K1C
ARF6	pp	YARS
ARFGEF1	pp	ARFGEF2
ARFGEF2	pp	ARFGEF1
ARFGEF2	pp	Itch
ARFGEF2	pp	PRKAR2A
ARG1
ARHGAP1	pp	ARHGAP1
ARHGAP1	pp	CDC42
ARHGAP1	pp	RAC1
ARHGAP1	pp	RHOA
ARHGAP10	pp	CDC42
ARHGAP10	pp	RHOA
ARHGAP26	pp	CDC42
ARHGAP26	pp	RHOA
ARHGAP9
ARHGDIA	pp	ACTL6A
ARHGDIA	pp	ARHGDIA
ARHGDIA	pp	BID
ARHGDIA	pp	CASP10
ARHGDIA	pp	CASP8
ARHGDIA	pp	CDC42
ARHGDIA	pp	CDKN1B
ARHGDIA	pp	DHX9
ARHGDIA	pp	EWSR1
ARHGDIA	pp	FADD
ARHGDIA	pp	FASLG
ARHGDIA	pp	FEN1
ARHGDIA	pp	HNRNPA3
ARHGDIA	pp	JUP
ARHGDIA	pp	MAPK8
ARHGDIA	pp	MSN
ARHGDIA	pp	RAC1
ARHGDIA	pp	RAC2
ARHGDIA	pp	RDX
ARHGDIA	pp	RHOA
ARHGDIA	pp	RHOG
ARHGDIA	pp	RHOH
ARHGDIA	pp	TNFRSF1A
ARHGDIB	pp	VAV1
ARHGEF1	pp	ARHGEF1
ARHGEF1	pp	GNA13
ARHGEF1	pp	HRAS
ARHGEF1	pp	RAP1A
ARHGEF1	pp	RHOA
ARHGEF11	pp	PLXNB2
ARHGEF11	pp	RHOA
ARHGEF12	pp	ARHGEF12
ARHGEF12	pp	GNA13
ARHGEF12	pp	PLXNB2
ARHGEF15	pp	MOBKL3
ARHGEF18	pp	GNB1
ARHGEF2	pp	RAC1
ARHGEF2	pp	RHOA
ARHGEF2	pp	YWHAQ
ARHGEF4	pp	RAC1
ARHGEF4	pp	RHOA
ARHGEF9	pp	GPHN
ARID1A	pp	CUL2
ARID1A	pp	PBRM1
ARID1A	pp	SMARCC1
ARID1A	pp	SMARCC2
ARID1B	pp	CUL2
ARID1B	pp	RBX1
ARID1B	pp	SMARCA4
ARID1B	pp	SMARCC1
ARID1B	pp	SMARCC2
ARID1B	pp	TCEB1
ARID4A	pp	ARID4B
ARID4B	pp	HDAC1
ARID4B	pp	HDAC2
Arid4b	mi	prediction_1_191689912_191689974_+_3p
ARID4B	mi	prediction_1_191689912_191689974_+_3p
ARID4B	pp	SAP130
ARID4B	pp	SIN3A
ARID4B	pp	SUDS3
ARIH2	pp	ARAP1
ARIH2	pp	DLST
ARIH2	pp	EEF1A1
ARIH2	pp	EEF1G
ARIH2	pp	ENSA
ARIH2	pp	IL4R
ARIH2	pp	KAT5
ARIH2	pp	RPL8
ARIH2	pp	SCAMP2
ARIH2	pp	SGCE
ARIH2	pp	SLC1A6
ARIH2	pp	WDR91
ARL1	pp	GCC2
ARL1	pp	GOLGA1
ARL2	pp	PDE6D
ARL2	pp	PPP2CA
ARL2	pp	PPP2CB
ARL2	pp	PPP2R5D
ARL2	pp	TBCD
ARL3	pp	C1orf103
ARL3	pp	PDE6D
ARL3	pp	UBR1
ARL3	pp	UNC119
ARL4D	pp	EPRS
ARL4D	pp	MAPK8IP3
ARL4D	pp	NDRG1
ARL4D	pp	UBR1
ARL4D	pp	UNC119
ARL5A	pp	CBX5
ARL6IP1	pp	FBXW7
ARL6IP1	pp	INPP5K
ARMC7	pp	KCTD13
ARMCX3	pp	CLTC
ARNTL	pp	CRY1
ARNTL	pp	HIF1A
ARNTL	pp	NPAS2
ARNTL2
ARPC1B	pp	PAK1
ARPC3	pp	ARAP1
ARPC3	pp	ARPC4
ARPC3	pp	PRMT1
ARPC3	pp	RPS4X
ARPC3	pp	WAS
ARPC3	pp	WASF1
ARPC4	mi	ENSSSCT00000020382_4_97900883_97900965_-_3p
ARPC5	pp	ARPC4
ARPP21
ARR3	pp	AP1B1
ARR3	pp	AP3B2
ARR3	pp	GNMT
ARR3	pp	RHO
ARR3	pp	RNASE6
ARR3	pp	SRC
ARRB2	pp	AP2B1
ARRB2	pp	AP3B1
ARRB2	pp	ARF6
ARRB2	pp	DDX27
ARRB2	pp	ITCH
ARRB2	pp	MAP3K5
ARRB2	pp	MAPK3
ARRB2	pp	MED8
ARRB2	pp	MRPL43
ARRB2	pp	MRPL44
ARRB2	pp	NOLC1
ARRB2	pp	PES1
ARRB2	pp	RAB5C
ARRB2	pp	SMARCC2
ARRB2	pp	TCOF1
ARSE
ASB6	pp	RNF7
ASCC3	pp	RELA
ASF1A	pp	CHAF1A
ASF1A	pp	CHAF1B
ASF1A	mi	prediction_14_74642364_74642424_-_5p
ASF1A	mi	prediction_15_68801727_68801793_-_5p
ASF1A	mi	prediction_15_68922333_68922399_-_5p
ASF1B	pp	CDAN1
ASF1B	pp	CHAF1A
ASF1B	pp	CHAF1B
ASF1B	pp	DOK2
ASF1B	pp	IPO4
ASF1B	pp	MRPS7
ASF1B	pp	NFKBIL2
ASF1B	pp	PSPH
ASF1B	pp	RBBP4
ASF1B	pp	RPL31
ASF1B	pp	RPS3A
ASF1B	pp	UBXN1
ASGR1	pp	LASS2
ASNA1	mi	ENSSSCT00000020382_4_97900883_97900965_-_3p
ASS1	pp	ASS1
ATF4	pp	CREBBP
ATF4	pp	GTF2B
ATF4	mi	prediction_6_47168088_47168158_+_3p
ATF4	pp	TBP
ATF4	pp	TREX2
ATF4	pp	TRIM24
ATF4	pp	TTR
ATF6	pp	ATF6
ATF6	pp	ATF6B
ATF6	pp	YY1
ATF7IP	pp	ERCC2
ATG16L1	pp	AGPS
ATG16L1	pp	ATG5
ATG16L1	pp	CCT2
ATG16L1	pp	CCT7
ATG2A	pp	ATG2B
ATG2A	pp	DNAJC7
ATG2A	pp	PHB2
ATG2A	pp	WDR45
ATG3	pp	ATG16L1
ATG3	pp	ATG4B
ATG3	pp	ATG5
ATG3	pp	ATG7
ATG3	pp	GABARAP
ATG3	pp	KRT85
ATG3	pp	MAP1B
ATG3	pp	OBSL1
ATG3	pp	TECPR1
ATG4B	pp	ANXA1
ATG4B	pp	GABARAP
ATG4B	pp	GABARAPL1
ATG5	pp	ATG16L1
ATG5	pp	IMPDH2
ATG5	pp	TECPR1
ATG5	pp	TKT
ATG7	pp	ATG3
ATG7	pp	GABARAP
ATG7	pp	GABARAPL1
ATG7	pp	MAP1LC3C
ATIC	pp	HNRPDL
ATIC	pp	JAK1
ATIC	pp	NDUFAF1
ATIC	pp	RADIL
ATIC	pp	STOM
ATL2	mi	ENSSSCT00000020794_9_13711338_13711447_-_5p
ATL2	mi	ENSSSCT00000021054_1_227255281_227255372_-_3p_2
ATL2	mi	ENSSSCT00000021054_1_227255281_227255372_-_3p_3
ATL2	mi	mmu-mir-101b_1_227255281_227255378_-_3p_2
ATL2	mi	mmu-mir-101b_1_227255281_227255378_-_3p_3
ATL2	mi	prediction_1_95733446_95733501_+_3p
ATL2	mi	prediction_15_14390446_14390503_-_3p
ATL2	mi	prediction_4_41959957_41960029_+_5p
ATL2	mi	prediction_5_65447567_65447637_+_3p
ATL2	mi	prediction_6_100309961_100310020_-_3p
ATL2	mi	prediction_7_56020910_56020968_+_5p
ATN1	pp	CTNND2
ATN1	pp	ITCH
ATN1	pp	MAGI2
ATN1	pp	RERE
ATN1	pp	VIM
ATP1B1	pp	C1orf103
ATP1B3
ATP2B2	pp	DLG2
ATP2B4	pp	DLG2
ATP5F1
ATP5G2	mi	prediction_2_78442718_78442780_+_3p
ATP5G2	mi	prediction_5_93536362_93536419_+_5p
ATP5G2	mi	prediction_5_93677146_93677203_+_5p
ATP5J2	pp	ARL8B
ATP5J2	pp	CCDC137
ATP5J2	pp	CRELD1
ATP5J2	pp	FBP1
ATP5J2	pp	LPP
ATP5J2	pp	PRPF4
ATP5J2	pp	RPLP1
ATP5J2	pp	ZFPL1
ATP6
ATP6AP1	pp	HBA1
ATP6AP2	pp	REN
ATP6V0C	pp	LASS2
ATP6V1E1	pp	ALDOB
ATP6V1F
ATP7A
ATP9A	mi	ENSSSCT00000019703_18_16054348_16054429_+_3p
ATR	pp	ABL1
ATR	pp	AP1B1
ATR	pp	AP2A2
ATR	pp	ARHGEF1
ATR	pp	ATR
ATR	pp	BRCA2
ATR	pp	E4F1
ATR	pp	HDAC1
ATR	pp	HDAC2
ATR	pp	MCM2
ATR	pp	MRE11A
ATR	pp	MSH2
ATR	pp	MSH6
ATR	pp	MTA2
ATR	pp	NBN
ATR	pp	POLD1
ATR	pp	PPP2R2A
ATR	pp	PTS
ATR	pp	RAD17
ATR	pp	TOPBP1
ATR	pp	XPC
ATRNL1
ATRX	pp	H3F3A
ATRX	pp	MUS81
ATXN2	pp	CD247
ATXN3	pp	HDAC3
ATXN3	pp	KCTD10
ATXN3	pp	NCOR1
ATXN3	pp	OTUB2
ATXN3	pp	VCP
ATXN7	pp	CRX
ATXN7	pp	PSMC1
ATXN7	pp	PSMD2
ATXN7	pp	PSMD7
ATXN7	pp	SUPT3H
ATXN7	pp	TRRAP
ATXN7	pp	USP22
AUH	pp	AUH
AUP1	pp	ITGA1
AURKB	pp	AURKB
AURKB	pp	INCENP
AURKB	pp	NSUN2
AVEN	pp	BCL2
AVPR1B
AVPR2	pp	ARRB2
AVPR2	pp	MAPK3
AXL	pp	GRB2
AXL	pp	PIK3R2
AXL	pp	SRC
AXL	pp	TENC1
AZI1
AZI2
B3GALT1
B3GAT3	pp	B3GAT3
B4GALT5	mi	ssc-mir-16_11_17603121_17603199_+_NA
B4GALT6
BACH1	pp	BACH1
BACH1	pp	HDAC1
BACH1	pp	MAFG
BACH1	pp	NCOR1
BACH1	pp	PATZ1
BACH1	pp	RBCK1
BAD	pp	BCL2
BAD	pp	BCL2A1
BAD	pp	BCL2L2
BAD	pp	EWSR1
BAD	pp	SFN
BAD	pp	YWHAB
BAD	pp	YWHAH
BAD	pp	YWHAQ
BAG1	pp	BCL2
BAG1	pp	HSPA4
BAG1	pp	HSPA8
BAG1	pp	MAPT
BAG1	pp	NR3C1
BAG1	pp	PPP1R15A
BAG1	pp	STUB1
BAG3	pp	DAZAP2
BAG3	pp	HSPA8
BAG5
BAIAP3
BANF1	pp	ACIN1
BANF1	pp	ACTL6A
BANF1	pp	ATP5J
BANF1	pp	BANF1
BANF1	pp	BCL7C
BANF1	pp	CD2BP2
BANF1	pp	CHAF1B
BANF1	pp	DDB1
BANF1	pp	DPY30
BANF1	pp	EHMT2
BANF1	pp	HDAC1
BANF1	pp	HDAC2
BANF1	pp	HMGA1
BANF1	pp	HNRNPC
BANF1	pp	HNRNPD
BANF1	pp	LMNA
BANF1	pp	MDC1
BANF1	pp	MTA2
BANF1	pp	NUMA1
BANF1	pp	PARP1
BANF1	pp	RBBP7
BANF1	pp	SMARCC2
BANF1	pp	SMARCE1
BANF1	pp	SMOC2
BANF1	pp	SNRPD3
BANF1	pp	SUB1
BANF1	pp	TRA2B
BANF1	pp	TUFM
BANF1	pp	XPC
BANP	pp	NFKB1
BANP	pp	RELA
BAP1	pp	ASXL1
BAP1	pp	ASXL2
BAP1	pp	FOXK1
BAP1	pp	FOXK2
BAP1	pp	HAT1
BAP1	pp	HCFC1
BAP1	pp	HSPA2
BAP1	pp	IPO4
BAP1	pp	IPO5
BAP1	pp	PPM1G
BAP1	pp	RBBP7
BAP1	pp	UBE2O
BAT4
BAT5	pp	GPRC5C
BAT5	pp	IFITM1
BAT5	pp	RNF5
BAT5	pp	SAFB
BAT5	pp	SPAG7
BAT5	pp	TMEM147
BATF	pp	IFI35
BAZ1A	pp	BAZ1B
BAZ1A	pp	SATB1
BAZ1A	pp	SMARCA5
BAZ1B	pp	ACTL6A
BAZ1B	pp	ARID1A
BAZ1B	pp	CHAF1B
BAZ1B	pp	ESR1
BAZ1B	pp	MYO1C
BAZ1B	pp	SF3B1
BAZ1B	pp	SMARCA5
BAZ1B	pp	SMARCB1
BAZ1B	pp	SMARCC1
BAZ1B	pp	SMARCC2
BAZ1B	pp	SMARCD1
BAZ1B	pp	SMARCE1
BAZ2A	pp	SMARCA5
BBS2
BBS5	mi	ssc-mir-142_12_32630403_32630482_-_NA
BCAM
BCAP29	pp	BCAP31
BCAP31	pp	BCAP31
BCAP31	pp	BCL2
BCAP31	pp	CASP8
BCAP31	pp	MYH10
BCAR1	pp	ABL1
BCAR1	pp	CD2AP
BCAR1	pp	CRK
BCAR1	pp	CRKL
BCAR1	pp	DOCK1
BCAR1	pp	EFS
BCAR1	pp	FYN
BCAR1	pp	HCK
BCAR1	pp	HSPA5
BCAR1	pp	INPPL1
BCAR1	pp	NCK1
BCAR1	pp	PPP1R15A
BCAR1	pp	PXN
BCAR1	pp	RAPGEF1
BCAR1	pp	SRC
BCAR1	pp	TNS1
BCAR1	pp	VCL
BCAR1	pp	VPS11
BCAR1	pp	YWHAZ
BCAR3	pp	BCAR1
BCAR3	pp	IARS
BCAR3	pp	IMPDH2
BCAR3	pp	PABPC1
BCAR3	pp	TARS
BCAT2	pp	BCAT2
BCCIP	pp	CDK2
BCKDHA
BCL2	pp	BID
BCL2	pp	BNIP3
BCL2	pp	BNIP3L
BCL2	pp	BNIPL
BCL2	pp	CASP8
BCL2	pp	HRK
BCL2	pp	IRS1
BCL2	pp	ITPR1
BCL2	pp	MYC
BCL2	pp	NR4A1
BCL2	pp	PIN1
BCL2	pp	PPP2CA
BCL2	pp	PPP2R5A
BCL2	pp	PSEN1
BCL2	pp	RAD9A
BCL2	pp	SERPINB8
BCL2	pp	SOD1
BCL2A1	pp	BAD
BCL2A1	pp	HRK
BCL2L10	pp	BCL2
BCL2L10	pp	BCL2L10
BCL2L14
BCL2L2	pp	BAD
BCL2L2	pp	BID
BCL2L2	pp	HRK
BCL3	pp	CYLD
BCL3	pp	FOS
BCL3	pp	GTF2A1
BCL3	pp	GTF2B
BCL3	pp	KAT5
BCL3	pp	NCOA1
BCL3	pp	NCOA6
BCL3	pp	NFKB1
BCL3	pp	PIR
BCL3	pp	RELB
BCL3	pp	TBP
BCL7C	pp	ACTB
BCL7C	pp	ACTL6A
BCL7C	pp	ARID1A
BCL7C	pp	BCL7C
BCL7C	pp	BRD7
BCL7C	pp	DPF2
BCL7C	pp	SMARCA4
BCL7C	pp	SMARCB1
BCL7C	pp	SMARCC1
BCL7C	pp	SMARCD1
BCL7C	pp	SMARCE1
BDKRB1
BDNF	pp	NTRK2
BEST1	pp	PPP2CA
BET1L	mi	ENSSSCT00000021054_1_227255281_227255372_-_3p_2
BET1L	mi	ENSSSCT00000021054_1_227255281_227255372_-_3p_3
BET1L	mi	mmu-mir-101b_1_227255281_227255378_-_3p_2
BET1L	mi	mmu-mir-101b_1_227255281_227255378_-_3p_3
BET1L	pp	STX5
BET1L	pp	YKT6
BEX1
BHLHE40	pp	BRD7
BHLHE40	pp	CHD3
BHLHE40	pp	SETDB1
BHLHE40	pp	VIM
BHMT	pp	BHMT
BID	pp	BCL2
BID	pp	BCL2A1
BID	pp	BID
BID	pp	CASP10
BID	pp	CASP8
BID	pp	FADD
BID	pp	FASLG
BID	pp	MAPK8
BID	pp	TNFRSF1A
BIN1	pp	BIN1
BIN1	pp	RFX3
BIN1	pp	XRCC5
BIN3	pp	ERH
BIRC2	pp	ADRM1
BIRC2	pp	BIRC2
BIRC2	pp	CASP3
BIRC2	pp	CASP7
BIRC2	pp	DIABLO
BIRC2	pp	GSPT1
BIRC2	pp	HTRA2
BIRC2	pp	JUP
BIRC2	pp	TRAF1
BLMH	pp	APP
BLMH	pp	BLMH
BLMH	pp	RPL11
BLMH	pp	RPL29
BLMH	pp	TRIO
BLNK	pp	BTK
BLNK	pp	CD79A
BLNK	pp	GRB2
BLNK	pp	MAP4K1
BLNK	pp	NCK1
BLNK	pp	VAV1
BLOC1S2	pp	BLOC1S3
BLOC1S2	pp	PLDN
BLOC1S3	pp	BLOC1S2
BLOC1S3	pp	PLDN
BLZF1	pp	GORASP2
BLZF1	mi	prediction_14_110219096_110219158_-_5p
BLZF1	pp	ZZZ3
BMI1	pp	BMI1
BMI1	pp	C1orf103
BMI1	pp	KAT5
BMI1	pp	PHC2
BMI1	pp	RING1
BMI1	pp	ZBTB16
BMP1	pp	CHRD
BMP2	pp	BMPR1B
BMP2	pp	MGP
BMP4	pp	BMPR1B
BMP7	pp	ACVR2A
BMP7	pp	ACVR2B
BMP7	pp	BMP7
BMP7	pp	BMPR1B
BMPR1B	pp	Arhgef6
BMPR1B	pp	BMPR1B
BMPR1B	pp	Fbxw5
BMPR1B	pp	Ilkap
BMPR1B	pp	Rab38
BMX	pp	CAV1
BMX	pp	PAK1
BMX	pp	RUFY1
BMX	pp	RUFY2
BMX	pp	SRC
BMX	pp	STAT3
BNIP1	pp	BCL2
BNIP3	pp	BNIP3
BNIP3	pp	BNIP3L
BNIP3	pp	HDAC1
BNIP3	pp	TMEM11
BNIP3L	pp	BNIP3L
BNIP3L	pp	EWSR1
BNIP3L	pp	TMEM11
BNIPL	pp	ARHGAP1
BNIPL	pp	BCL2
BNIPL	pp	BNIPL
BNIPL	pp	CDC42
BNIPL	pp	GFER
BNIPL	pp	MIF
BOC	pp	C1orf103
BOC	pp	CDH1
BOC	pp	CTNNB1
BOK	pp	BCL2A1
BOLA1
BPTF	pp	HIST1H3A
BPTF	pp	MAZ
BPTF	pp	RBBP4
BPTF	pp	RBBP7
BRAP	mi	ENSSSCT00000021054_1_227255281_227255372_-_3p_2
BRAP	mi	ENSSSCT00000021054_1_227255281_227255372_-_3p_3
BRAP	mi	mmu-mir-101b_1_227255281_227255378_-_3p_2
BRAP	mi	mmu-mir-101b_1_227255281_227255378_-_3p_3
BRAP	mi	prediction_6_47168088_47168158_+_3p
BRCA2	pp	AURKB
BRCA2	pp	BCCIP
BRCA2	pp	BRE
BRCA2	pp	BUB1B
BRCA2	pp	C11orf30
BRCA2	pp	KAT2B
BRCA2	pp	MCPH1
BRCA2	mi	prediction_4_9554192_9554260_-_5p
BRCA2	pp	SKP2
BRCA2	pp	SMAD2
BRCA2	pp	SMAD3
BRCA2	pp	STAT5A
BRCA2	pp	USP11
BRD2	pp	BRD2
BRD2	pp	E2F1
BRD2	pp	TBP
BRD3
BRD4	pp	CCNT2
BRD4	pp	CDK9
BRD4	pp	HIST2H3C
BRD4	pp	MED14
BRD4	pp	MED17
BRD4	pp	RFC2
BRD4	pp	RFC3
BRD4	pp	RFC4
BRD4	pp	RFC5
BRD4	pp	SIPA1
BRD7	pp	HNRNPUL1
BRD7	pp	MYC
BRD7	pp	SMARCA4
BRD7	pp	SMARCC1
BRD8	pp	C20orf20
BRE	pp	ATG2A
BRE	pp	C19orf62
BRE	pp	DHRS7B
BRE	pp	FAM175A
BRE	pp	FAM175B
BRE	pp	FAS
BRE	pp	LRPPRC
BRE	pp	MMS19
BRE	pp	PHB
BRE	pp	SHMT2
BRE	pp	SSR3
BRE	pp	TNFRSF1A
BRF2	pp	ABCD3
BRF2	pp	AIFM1
BRF2	pp	COPG
BRF2	pp	DPM1
BRF2	pp	GCN1L1
BRF2	pp	IPO4
BRF2	pp	NOC2L
BRF2	pp	PTPLAD1
BRF2	pp	SF3B1
BRF2	pp	SMAP1
BRF2	pp	SMPD4
BRF2	pp	TBP
BRF2	pp	TMEM33
BRF2	pp	XPO6
BRF2	pp	XPO7
BRMS1	pp	C1orf103
BRMS1	pp	EEF1A1
BRMS1	pp	NFKB1
BRMS1	pp	RELA
BRMS1L
BRP44	pp	RPLP1
BRP44L
BRPF1	pp	PBXIP1
BRPF3
BRWD2	mi	antisense-ssc-mir-739_6_250392_250483_-_NA
BSCL2	pp	USE1
BST1	pp	BST1
BTAF1	pp	GTF2H4
BTAF1	pp	TBP
BTBD10	pp	DLG5
BTBD12	pp	C20orf11
BTBD12	pp	C20orf94
BTBD12	pp	DCAF10
BTBD12	pp	EME1
BTBD12	pp	ERCC1
BTBD12	pp	LRRC1
BTBD12	pp	MSH2
BTBD12	pp	MSH3
BTBD12	pp	MUS81
BTBD12	pp	PGAM5
BTBD12	pp	PLK1
BTBD12	pp	TERF2
BTBD12	pp	TERF2IP
BTBD12	pp	TEX10
BTF3	pp	CSNK2B
BTF3	pp	POLR2B
BTG2	pp	CNOT1
BTG2	pp	CNOT6L
BTG2	pp	CNOT8
BTG2	pp	PRMT1
BTG4
BTK	pp	BLNK
BTK	pp	BTK
BTK	pp	CAV1
BTK	pp	CBLB
BTK	pp	EWSR1
BTK	pp	FYN
BTK	pp	HCK
BTK	mi	mmu-mir-148a_18_45214533_45214632_-_3p
BTK	pp	PLCG2
BTK	pp	PRKCB
BTK	pp	PRKD1
BTK	pp	VAV1
BTK	pp	WAS
BTRC	pp	ATF4
BTRC	pp	BTRC
BTRC	pp	COPS4
BTRC	pp	CTNNB1
BTRC	pp	CUL1
BTRC	pp	EPOR
BTRC	pp	GHR
BTRC	pp	GPRASP2
BTRC	pp	HIVEP1
BTRC	pp	HIVEP2
BTRC	pp	JUP
BTRC	pp	KEAP1
BTRC	pp	NFKBIA
BTRC	pp	NFKBIB
BTRC	pp	NRD1
BTRC	pp	NUDC
BTRC	pp	PER1
BTRC	pp	PRKACA
BTRC	pp	RELA
BTRC	pp	SKP1
BTRC	pp	SMAD4
BTRC	pp	TP63
BTRC	pp	TRIM9
BTRC	pp	TUBGCP2
BTRC	pp	UBA1
BTRC	pp	UBE2D3
BTRC	pp	USP47
BTRC	pp	WEE1
BUB1B	pp	CDC20
BUB1B	pp	HDAC1
BUB1B	pp	MAD2L1
BUB1B	pp	PARP1
BYSL	pp	TRIM37
BZRAP1	pp	TSPO
BZW1	pp	BZW2
BZW1	pp	EDEM1
BZW1	pp	KDELR1
BZW1	pp	PSTPIP1
C10orf82
C10orf88	pp	CLTC
C11orf1	pp	SETDB1
C11orf17	pp	NEDD8
C11orf17	pp	PRKACA
C11orf17	pp	RELA
C11orf17	pp	SENP8
C11orf17	pp	SIRT1
C11orf30	pp	BRCA2
C11orf30	pp	KIAA1967
C11ORF30	mi	prediction_14_74099115_74099184_-_5p
C11ORF31	mi	prediction_4_9554192_9554260_-_5p
C11orf54
C11orf58
C11orf59	pp	EEF1A1
C12ORF10
C12orf11	pp	ZNF655
C13orf18
C13ORF27	mi	ENSSSCT00000020485_7_133847437_133847512_+_3p
C13ORF27	mi	hsa-mir-370_7_133847437_133847512_+_3p
C14orf102
C14ORF147	mi	prediction_6_47168088_47168158_+_3p
C14orf147
C14orf166
C15ORF61	mi	prediction_6_47168088_47168158_+_3p
C16ORF59	mi	ssc-mir-16_11_17603121_17603199_+_NA
C16orf59
C16orf70
C18orf22
C18ORF25	mi	ENSSSCT00000019703_18_16054348_16054429_+_3p
C18orf25
C18orf8
C19orf43
C19orf57	pp	C19orf57
C19ORF57	mi	ENSSSCT00000021054_1_227255281_227255372_-_3p_2
C19ORF57	mi	ENSSSCT00000021054_1_227255281_227255372_-_3p_3
C19ORF57	mi	mmu-mir-101b_1_227255281_227255378_-_3p_2
C19ORF57	mi	mmu-mir-101b_1_227255281_227255378_-_3p_3
C19ORF6	mi	prediction_5_93536362_93536419_+_5p
C19ORF6	mi	prediction_5_93677146_93677203_+_5p
C19orf62	pp	ARF4
C19orf62	pp	ATAD1
C19orf62	pp	BRE
C19orf62	pp	CBARA1
C19orf62	pp	CXorf26
C19orf62	pp	DIS3
C19orf62	pp	FAM175A
C19orf62	pp	FAM175B
C19orf62	pp	GMPS
C19orf62	pp	GPT2
C19orf62	pp	MELK
C19orf62	pp	MRPL53
C19ORF62	mi	oan-mir-183_18_17172201_17172332_-_3p
C19orf62	pp	PARK7
C19orf62	pp	PDHA1
C19orf62	pp	PLK1
C19orf62	pp	PRDX5
C19orf62	pp	PRKAG1
C19orf62	pp	PSMA4
C19orf62	pp	PYCRL
C19orf62	pp	SFXN4
C19orf62	pp	SHMT2
C19orf62	pp	TNKS
C19orf62	pp	UBXN1
C19orf62	pp	VPS4A
C19orf62	pp	VPS4B
C1D	pp	TSNAX
C1GALT1C1	pp	LGALS3
C1orf107
C1orf128
C1ORF151
C1ORF26	mi	prediction_9_37494321_37494385_-_3p
C1orf55
C1QA	pp	C1R
C1QA	pp	C1S
C1QA	pp	DCN
C1QA	pp	FN1
C1QBP	pp	PRKCD
C1QBP	pp	PRKD1
C1QC	mi	ssc-mir-101_1_227255282_227255372_-_NA
C1QTNF5	pp	C1QTNF5
C1QTNF5	mi	ENSSSCT00000020485_7_133847437_133847512_+_3p
C1QTNF5	mi	hsa-mir-370_7_133847437_133847512_+_3p
C1QTNF5	mi	prediction_X_121322517_121322575_+_3p
C1R	pp	C1R
C1R	pp	C1S
C1R	pp	SERPING1
C1S	pp	C1R
C20orf20	pp	BRD8
C20orf24	pp	ABCD3
C20orf24	pp	AIFM1
C20orf24	pp	DYNC1H1
C20orf24	pp	GCN1L1
C20orf24	pp	PTPLAD1
C20orf24	pp	RFXANK
C20orf24	pp	SLC25A12
C20orf24	pp	SSR3
C20orf24	pp	SSR4
C20orf24	pp	SURF4
C20orf24	pp	XPO7
C20orf27	pp	RALYL
C20orf4	pp	EAPP
C20orf72
C20orf94	pp	BTBD12
C20orf94	pp	COPS7A
C20orf94	pp	CUL1
C20orf94	pp	FBXW4
C20orf94	pp	RNF20
C20orf94	pp	RNH1
C20orf94	pp	STK4
C21orf91
C22ORF30	mi	ssc-mir-29a-shorter/ssc-isomir-29a_18_16054752_16054837_+_NA
C22ORF30	mi	ssc-mir-29c_9_127174326_127174413_+_NA
C2orf51
C3orf15	pp	MYCBP
C3orf15	pp	PRKAR2B
C4BPA	pp	APCS
C5	pp	C7
C5	mi	cfa-mir-212_12_45599921_45599983_-_3p
C5	mi	ENSSSCT00000021491_12_45599921_45599983_-_3p
C5AR1	pp	C5
C5AR1	pp	GNAI2
C5AR1	pp	GNAI3
C5H12ORF32	mi	prediction_12_12927873_12927940_+_5p
C6ORF106	mi	ENSSSCT00000020485_7_133847437_133847512_+_3p
C6ORF106	mi	hsa-mir-370_7_133847437_133847512_+_3p
C6ORF168
C6ORF203
C6orf204
C7ORF23	mi	ENSSSCT00000020382_4_97900883_97900965_-_3p
C7orf26
C7orf43	pp	C7orf43
C7orf43	pp	TMEM50A
C7orf50
C8orf33	pp	GIT1
C8orf41	pp	HSPA4
C8orf41	pp	PIH1D1
C8orf41	pp	RUVBL1
C8orf41	pp	RUVBL2
C8orf41	pp	TELO2
C9orf25	pp	PDE6D
C9orf25	pp	POLA2
C9orf82	pp	XRCC4
CA11
CA12	pp	CA12
CA4
CA8	pp	ITPR1
CA8	pp	LRCH4
CA9	pp	CDH1
CA9	pp	CTNNA1
CA9	pp	CTNNB1
CABIN1	pp	AP1B1
CABIN1	pp	DNM1
CABIN1	pp	H3F3A
CABIN1	pp	MEF2D
CABIN1	pp	SIN3A
CABLES1
CABP1	pp	CACNA1A
CABP1	pp	CACNA1C
CABP1	pp	GRK5
CABP1	pp	ITPR1
CACNA1C	pp	CABP1
CACNA1C	pp	SRI
CACNA1E	pp	EFHC1
CACNA1F
CACNB3	pp	CACNA1C
CACYBP	pp	SKP1
CAD
CALB1	pp	IMPA1
CALB1	pp	RANBP9
CALCOCO1	pp	HIST1H3A
CALM1	pp	AKAP9
CALM1	pp	CAMK2G
CALM1	pp	GRK4
CALM1	pp	GRK5
CALM1	pp	IQGAP1
CALM1	pp	MAPT
CALM1	pp	SYT1
CALM1	pp	TCF3
CALM1	pp	TCF4
CALR	pp	APOB
CALR	pp	APP
CALR	pp	F5
CALR	pp	PDIA3
CALR	pp	PLAT
CALR	pp	SLC2A1
CALR	pp	TF
CALU	pp	APCS
CAMK2B
CAMK2D	pp	RPS18
CAMK2G	pp	RRAD
CAMK2G	pp	SMAD2
CAMK2G	pp	SMAD4
CAMKK2	pp	ATG4B
CAMKK2	pp	CALM1
CAMKK2	pp	ESYT2
CAMKK2	pp	GCN1L1
CAMKK2	pp	MAPK14
CAMKK2	pp	OBSL1
CAMKK2	pp	PRKAG1
CAMKK2	pp	SMC3
CAMKK2	pp	XPOT
CAND2	pp	CNOT3
CAP1	pp	CAP1
CAP1	pp	CAP2
CAP2	pp	CAP1
CAPN2	pp	BCL2
CAPN2	pp	BID
CAPN3
CAPZA2
CAPZB	pp	BCCIP
CAPZB	pp	MRPL20
CARD10
CARD6	pp	NA
CARD6	pp	NOD1
CASC5
CASP1	pp	BCAP31
CASP1	pp	CASP1
CASP1	pp	EGFR
CASP1	pp	IL18
CASP1	pp	NA
CASP1	pp	NOD2
CASP10	pp	CASP1
CASP10	pp	CASP10
CASP10	pp	CASP2
CASP10	pp	CASP3
CASP10	pp	CASP7
CASP10	pp	CASP8
CASP10	pp	DEDD
CASP10	pp	DEDD2
CASP10	pp	FADD
CASP10	pp	FASLG
CASP10	pp	TNFRSF1A
CASP10	pp	TRAF1
CASP2	pp	BCL2
CASP2	pp	BID
CASP2	pp	CASP2
CASP2	pp	LRDD
CASP2	pp	NOL3
CASP3	pp	BCL2
CASP3	pp	BID
CASP3	pp	BMX
CASP3	pp	CASP2
CASP3	pp	CASP3
CASP3	pp	CTTN
CASP3	pp	GRIPAP1
CASP3	pp	HCLS1
CASP3	pp	HSPD1
CASP3	pp	HSPE1
CASP3	pp	PARG
CASP3	pp	SRP72
CASP5
CASP7	pp	CASP2
CASP7	pp	TNFRSF1A
CASP8	pp	BCAP31
CASP8	pp	BCL2
CASP8	pp	BID
CASP8	pp	BIRC2
CASP8	pp	CASP1
CASP8	pp	CASP10
CASP8	pp	CASP2
CASP8	pp	CASP3
CASP8	pp	CASP7
CASP8	pp	CASP8
CASP8	pp	CHD3
CASP8	pp	DEDD
CASP8	pp	DEDD2
CASP8	pp	FADD
CASP8	pp	FASLG
CASP8	pp	IFT57
CASP8	pp	NOL3
CASP8	pp	NR1H4
CASP8	pp	TNFAIP3
CASP8	pp	TNFRSF1A
CASP8	pp	TRADD
CASP8	pp	TRAF1
CASP8	pp	VIM
CASP8AP2	pp	CASP8
CASP8AP2	pp	CASP8AP2
CASP8AP2	pp	FADD
CASP8AP2	pp	FAS
CASQ2
CAT	pp	ABL1
CAT	pp	CAT
CAT	pp	PEX5
CAV1	pp	ADRBK1
CAV1	pp	AQP3
CAV1	pp	BTK
CAV1	pp	CAV2
CAV1	pp	CSK
CAV1	pp	EDNRB
CAV1	pp	FLOT2
CAV1	pp	GJA1
CAV1	pp	GRK5
CAV1	pp	NEU3
CAV1	pp	NOS1
CAV1	pp	NTRK1
CAV1	pp	PDGFRB
CAV1	pp	S1PR1
CAV1	pp	SCP2
CAV1	pp	SMAD2
CAV1	pp	SRC
CAV1	pp	TRADD
CAV2	pp	CAV1
CAV2	pp	NCK1
CAV2	pp	SRC
CAV2	mi	ssc-mir-101_1_227255282_227255372_-_NA
CBFA2T3	pp	HDAC1
CBFA2T3	pp	HDAC3
CBFA2T3	pp	NCOR1
CBFA2T3	pp	PRKAR2A
CBFA2T3	pp	RUNX1T1
CBFA2T3	pp	TCF3
Cbl	pp	F2RL1
CBLB	pp	CRKL
CBLB	pp	CRY1
CBLB	pp	EGFR
CBLB	pp	GORASP2
CBLB	pp	GRB2
CBLB	pp	PLCG2
CBLB	pp	SHC1
CBLB	pp	SORBS3
CBLB	pp	SYK
CBLB	pp	VAV1
CBLC	pp	CRK
CBLC	pp	EGFR
CBLC	pp	FYN
CBLN3	mi	ENSSSCT00000020382_4_97900883_97900965_-_3p
CBS	pp	CBS
CBS	pp	FXR2
CBS	pp	VTA1
CBX5	pp	ARL5A
CBX5	pp	ATRX
CBX5	pp	CBX5
CBX5	pp	CHAF1A
CBX5	pp	DNMT3B
CBX5	pp	HDAC5
CBX5	pp	HDAC9
CBX5	pp	HDLBP
CBX5	pp	HIST1H3A
CBX5	pp	MECP2
CBX5	pp	SETDB1
CBX5	pp	SMARCA4
CBX5	pp	TBP
CBX7	pp	BMI1
CBX7	pp	HDAC2
CBX7	pp	HIST1H3A
CBX7	pp	PHC2
CBX7	pp	RING1
CBY1	pp	CTNNB1
CCBL2
CCBP2	pp	CCL14
CCBP2	pp	CCL5
CCBP2	pp	CCL8
CCDC106	pp	ATF4
CCDC106	pp	C14orf1
CCDC106	pp	C1orf103
CCDC106	pp	C7orf64
CCDC106	pp	COPS6
CCDC106	pp	CRMP1
CCDC106	pp	EEF1G
CCDC106	pp	KAT5
CCDC106	pp	SETDB1
CCDC109B	pp	ZBTB16
CCDC11
CCDC112
CCDC113	pp	GIT1
CCDC113	pp	PFN2
CCDC130	pp	EEF1A1
CCDC130	pp	ZBTB16
CCDC136	mi	ssc-mir-142_12_32630403_32630482_-_NA
CCDC138	mi	ENSSSCT00000020296_2_136265608_136265674_+_3p
CCDC138	mi	mmu-mir-148a_18_45214533_45214632_-_3p
CCDC138	mi	ssc-mir-378_2_136265603_136265682_+_NA
CCDC33	pp	ZBTB8A
CCDC42
CCDC47	pp	TOM1L1
CCDC67
CCDC86	pp	DLST
CCK	pp	CCKBR
CCL22	pp	CCR4
CCL25
CCL3L1	pp	CCR3
CCL5	pp	CCR3
CCL5	pp	SDC1
CCNB1IP1	pp	CCNB1IP1
CCNB2
CCNB3	pp	CDK2
CCNDBP1	pp	DAPK1
CCNDBP1	pp	SIRT6
CCNE1	pp	CDK2
CCNE1	pp	CDKN1B
CCNE1	pp	CUL3
CCNE1	pp	RBL2
CCNE1	pp	SF3B1
CCNE1	pp	SKP2
CCNE1	pp	SMARCA4
CCNE1	pp	SMARCB1
CCNE1	pp	SMARCC1
CCNE2	pp	CDK2
CCNH	pp	ESR1
CCNH	pp	MNAT1
CCNH	pp	PSMA1
CCNH	pp	RADIL
CCNL1
CCNT2	pp	CDK9
CCR3	pp	CCL5
CCR3	pp	FGR
CCR3	pp	HCK
CCR4	pp	ADRBK1
CCR4	pp	ADRBK2
CCR4	pp	CCL5
CCR4	pp	CNOT8
CCR6	pp	CCL20
CCS	pp	APBA1
CCS	pp	CCS
CCS	pp	SOD1
CCT2	pp	CCNE1
CCT5	pp	TBC1D17
CCT5	pp	THEG
CCT7	pp	CRMP1
CCT7	pp	EEF1G
CCT7	pp	KAT5
CD151	pp	CD46
CD151	pp	ITGA3
CD151	pp	ITGB1
CD163	pp	CSNK2B
CD1D	pp	B2M
CD1D	pp	CALR
CD1D	pp	P4HTM
CD1D	pp	PTPRC
CD2	pp	CD2AP
CD2	pp	CD2BP2
CD2	pp	CD48
CD2	pp	CD5
CD2	pp	CD53
CD2	pp	CD58
CD2	pp	FYN
CD2	pp	ITK
CD2	pp	LGALS1
CD2	pp	PSTPIP1
CD2	pp	PTPRC
CD209	pp	CD209
CD24	pp	FGR
CD24	pp	SELP
CD244
CD247	pp	JAK3
CD2AP	pp	CD2AP
CD2AP	pp	CDH3
CD2AP	pp	PTK2B
CD2BP2	pp	CD2
CD2BP2	pp	EWSR1
CD2BP2	pp	P4HB
CD2BP2	pp	PRPF6
CD2BP2	pp	SNRNP200
CD2BP2	pp	SNRPG
CD34	pp	ATF5
CD34	pp	CREM
CD34	pp	CRKL
CD36	pp	CD9
CD36	pp	FYN
CD36	pp	HSD11B1
CD36	pp	ITGB1
CD36	pp	ITGB3
CD36	pp	LDLR
CD3D	pp	UBA52
CD3D	pp	VCP
CD3EAP	pp	POLR1D
CD3EAP	pp	POLR1E
CD3EAP	pp	TBP
CD3G
CD4	pp	BTRC
CD4	pp	CD81
CD4	pp	CXCR4
CD4	pp	EPS15
CD4	pp	IL16
CD4	pp	KCNAB2
CD4	pp	PIP
CD4	pp	SPG21
CD4	pp	SYK
CD4	pp	UNC119
CD40	pp	CALR
CD40	pp	ERP44
CD40	pp	RFC5
CD40	pp	SGK1
CD40	pp	SLC39A7
CD40	pp	UGGT1
CD40	pp	XRCC5
CD40LG	pp	APOA1
CD40LG	pp	RNF128
CD46	pp	CD151
CD46	pp	CD9
CD46	pp	ITGB1
CD46	pp	MSN
CD47	pp	BNIP3
CD47	mi	ENSSSCT00000020485_7_133847437_133847512_+_3p
CD47	mi	hsa-mir-370_7_133847437_133847512_+_3p
CD47	pp	ITGB1
CD47	mi	prediction_4_9554192_9554260_-_5p
CD5	pp	CD6
CD55	pp	CD55
CD59
CD63	pp	CD9
CD63	pp	ITGB1
CD72	pp	BLNK
CD74	pp	CD74
CD74	pp	MIF
CD79A	pp	AMBP
CD79A	pp	BLNK
CD79A	pp	SYK
CD81	pp	CD46
CD81	pp	CD81
CD81	pp	CD9
CD81	pp	DLG5
CD81	pp	IFITM1
CD81	pp	ITGB1
CD81	pp	TSPAN4
CD81	pp	ZBTB16
CD84	pp	CD84
CD84	pp	SH2D1B
CD86
CD8B
CD9	pp	CD46
CD9	pp	CD53
CD9	pp	ITGB1
CD9	pp	SERPINH1
CD9	pp	TSPAN4
CDC20	pp	ANAPC2
CDC20	pp	ANAPC5
CDC20	pp	BUB1B
CDC20	pp	CCDC59
CDC20	pp	CDC20
CDC20	pp	CDC23
CDC20	pp	CREBBP
CDC20	pp	FZR1
CDC20	pp	HDAC1
CDC20	pp	HDAC2
CDC20	pp	KRT33A
CDC20	pp	KRT85
CDC20	pp	MAD2L1
CDC20	pp	SPATC1
CDC20	pp	YARS2
CDC25C	pp	MAPK14
CDC25C	pp	MAPK3
CDC25C	pp	PCNA
CDC25C	pp	PIN1
CDC25C	pp	YWHAB
CDC37	pp	CDK4
CDC37	pp	SRC
CDC40
CDC42	pp	ARHGAP1
CDC42	pp	ARHGAP29
CDC42	pp	ARHGDIA
CDC42	pp	ARHGEF11
CDC42	pp	ARRB2
CDC42	pp	BNIPL
CDC42	pp	C14orf1
CDC42	pp	C1orf103
CDC42	pp	CDC42
CDC42	pp	CDC42EP2
CDC42	pp	CDC42EP3
CDC42	pp	CDC42EP4
CDC42	pp	CDC42EP5
CDC42	pp	COX1
CDC42	pp	CSN2
CDC42	pp	EEF1G
CDC42	pp	ERRFI1
CDC42	pp	FMNL2
CDC42	pp	HERC2
CDC42	pp	IQGAP1
CDC42	pp	KAT5
CDC42	pp	KIAA2026
CDC42	pp	MAP3K11
CDC42	pp	MAP3K4
CDC42	pp	MCF2
CDC42	pp	MCM3AP
CDC42	pp	MUC12
CDC42	pp	MYO9A
CDC42	pp	PAK1
CDC42	pp	PAK2
CDC42	pp	PAK3
CDC42	pp	PAK6
CDC42	pp	PDE6D
CDC42	pp	PLEKHG2
CDC42	pp	RAC1
CDC42	pp	Rock1
CDC42	pp	RPL22
CDC42	pp	RPL23
CDC42	pp	S100A9
CDC42	pp	SH3D19
CDC42	pp	ST13
CDC42	pp	SYNE1
CDC42	pp	UBR1
CDC42	pp	UNC119
CDC42	pp	VAV1
CDC42	pp	VRK2
CDC42	pp	WAS
CDC42EP2	pp	SEPT6
CDC42EP2	pp	CDC42
CDC42EP3	pp	SEPT6
CDC42EP3	pp	CDC42
CDC42EP3	pp	CDC42EP3
CDC42EP5	pp	Sept6
CDC42EP5	pp	CDC42
CDC5L	pp	BCAS2
CDC5L	pp	BZW1
CDC5L	pp	CWC15
CDC5L	pp	DYNC1H1
CDC5L	pp	GCN1L1
CDC5L	pp	HSPA8
CDC5L	pp	PPM1D
CDC5L	pp	RBM16
CDC5L	pp	RBMX
CDC5L	pp	RPL12
CDC5L	pp	RPS16
CDC5L	pp	SF3B1
CDC5L	pp	SF3B4
CDC5L	pp	SFPQ
CDC5L	pp	SNRPA1
CDC5L	pp	SNRPD2
CDC5L	pp	SNRPD3
CDC5L	pp	SRRM1
CDC7	pp	CHAF1A
CDC7	pp	DBF4
CDC7	pp	MCM2
CDC7	pp	MCM5
CDC7	pp	ORC1L
CDC7	pp	ORC6L
CDCA2
CDCA3	pp	CUL1
CDCA3	pp	SKP1
CDCA3	pp	WEE1
CDCA4	pp	KAT2B
CDCA4	pp	SUPT7L
CDCA4	pp	XPO1
CDCA5	pp	PDS5A
CDCA5	pp	SMC3
CDCA7L
CDH1	pp	CDC23
CDH1	pp	CDC26
CDH1	pp	CDH1
CDH1	pp	CDH3
CDH1	pp	CREBBP
CDH1	pp	CSE1L
CDH1	pp	CTNNA1
CDH1	pp	CTNNB1
CDH1	pp	EGFR
CDH1	pp	FYN
CDH1	pp	GNA13
CDH1	pp	HDAC1
CDH1	pp	HDAC2
CDH1	pp	IQGAP1
CDH1	pp	JUP
CDH1	pp	PSEN1
CDH1	pp	SRC
CDH1	pp	VCL
CDH15
CDH3	pp	CDH1
CDH3	pp	CDH3
CDH3	pp	CTNNA1
CDH3	pp	CTNNB1
CDH3	pp	JUP
CDH8	pp	CTNNB1
CDH8	mi	prediction_12_12927873_12927940_+_5p
CDK10	pp	ETS2
CDK19	pp	RB1CC1
CDK2	pp	CCNE1
CDK2	pp	CDC5L
CDK2	pp	CDK15
CDK2	pp	CDKN1B
CDK2	pp	CDKN3
CDK2	pp	CHAF1A
CDK2	pp	EPB41
CDK2	pp	FAM113A
CDK2	pp	FEN1
CDK2	pp	MYBL2
CDK2	pp	NEDD8
CDK2	pp	ORC1L
CDK2	pp	PCNA
CDK2	pp	RADIL
CDK2	pp	RBL2
CDK2	pp	RBM4
CDK2	pp	SKP2
CDK2	pp	SORT1
CDK2	pp	UBE2M
CDK4	pp	CDC37
CDK4	pp	CDKN1B
CDK4	pp	CDKN2C
CDK4	pp	PCNA
CDK4	pp	SETDB1
CDK4	pp	SMC3
CDK4	pp	UBXN1
CDK4	pp	VTA1
CDK5R1	pp	CDK5RAP2
CDK5R1	pp	CDK5RAP3
CDK5R1	pp	CTNNB1
CDK5R2
CDK5RAP2	pp	C14orf1
CDK5RAP2	pp	C7orf64
CDK5RAP2	pp	CDK5R1
CDK5RAP2	pp	CRMP1
CDK5RAP2	pp	EEF1G
CDK5RAP2	pp	KAT5
CDK5RAP2	pp	ZNF259
CDK5RAP3	pp	ARL1
CDK5RAP3	pp	CDK5R1
CDK5RAP3	pp	CRMP1
CDK5RAP3	pp	KIAA0776
CDK9	pp	AFF4
CDK9	pp	BRD4
CDK9	pp	CCDC87
CDK9	pp	CCNT2
CDK9	pp	CCT4
CDK9	pp	CCT5
CDK9	pp	CCT8
CDK9	pp	CDK9
CDK9	pp	CSNK2B
CDK9	pp	CUL1
CDK9	pp	DDX5
CDK9	pp	EXOSC5
CDK9	pp	FKBP5
CDK9	pp	HNRNPA1
CDK9	pp	HNRNPA2B1
CDK9	pp	HNRNPD
CDK9	pp	HNRNPH1
CDK9	pp	HNRNPU
CDK9	pp	HSPA2
CDK9	pp	HSPA5
CDK9	pp	HSPD1
CDK9	pp	IGF2BP2
CDK9	pp	KIAA1967
CDK9	pp	LARP7
CDK9	pp	MYBL2
CDK9	pp	RBM39
CDK9	pp	RELA
CDK9	pp	RFC4
CDK9	pp	RPS4X
CDK9	pp	RUVBL1
CDK9	pp	RUVBL2
CDK9	pp	SART3
CDK9	pp	SKP1
CDK9	pp	SKP2
CDK9	pp	SUPT5H
CDK9	pp	SYNCRIP
CDK9	pp	TRIP12
CDK9	pp	YBX1
CDKL5	pp	CDKL5
CDKL5	pp	MECP2
CDKN1B	pp	AKT1
CDKN1B	pp	CCNE1
CDKN1B	pp	CDK2
CDKN1B	pp	CDK4
CDKN1B	pp	CUL4A
CDKN1B	pp	GRB2
CDKN1B	pp	RNF123
CDKN1B	pp	SKP2
CDKN1B	pp	TSC1
CDKN1B	pp	TSC2
CDKN1B	pp	XPO1
CDKN1B	pp	YWHAQ
CDKN1C	pp	PCNA
CDKN1C	pp	SKP2
CDKN2C	pp	APLP1
CDKN2C	pp	C1orf103
CDKN2C	pp	C7orf64
CDKN2C	pp	CDK4
CDKN2C	pp	COPS6
CDKN2C	pp	DRAP1
CDKN2C	pp	QPCTL
CDKN2C	pp	UNC119
CDKN3	pp	CDK2
CDT1	pp	ANAPC5
CDT1	pp	BAZ1B
CDT1	pp	CCNE1
CDT1	pp	CDC20
CDT1	pp	CDC23
CDT1	pp	CDK2
CDT1	pp	CDK4
CDT1	pp	CUL1
CDT1	pp	DDB1
CDT1	pp	E2F1
CDT1	pp	FZR1
CDT1	pp	GMNN
CDT1	pp	MCM6
CDT1	pp	NPM1
CDT1	pp	PCNA
CDT1	pp	SKP2
CDT1	pp	SMARCA5
[truncated: 11,716 more rows]
